# Supplementary material
Source: publisher site journal article supplement (https://www.dovepress.com/article/302221)
Supplement: Supplementary file 1 [file get_supplementary_file.php]

Supplementary table legends

**Supplementary materials**

Table S1: Potential binding genes of periplocin acquired from PharmMapper database.

| Pharma Model | |  | Uniplot |
| --- | --- | --- | --- |
| 1p49_v |  |  | STS_HUMAN |
| 1q8m_v |  |  | Q9NP99 |
| 1j96_v |  |  | AK1C2_HUMAN |
| 1okl_v |  |  | CAH2_HUMAN |
| 1q33_v |  |  | Q9BW91 |
| 2cgw_v |  |  | CHK1_HUMAN |
| 2b3k_v |  |  | AMPM1_HUMAN |
| 1e7e_v |  |  | ALBU_HUMAN |
| 1m9z_v |  |  | TGFR2_HUMAN |
| 1smd_v |  |  | P04745 |
| 1z68_v |  |  | SEPR_HUMAN |
| 1t63_v |  |  | ANDR_HUMAN |
| 2oji_v |  |  | MK01_HUMAN |
| 1l6l_v |  |  | APOA2_HUMAN |
| 2jbp_v |  |  | P49137 |
| 2roy_v |  |  | TTHY_HUMAN |
| 1ung_v |  |  | CD5R1_HUMAN |
| 1v3q_v |  |  | PNPH_HUMAN |
| 1fh0_v |  |  | CATL2_HUMAN |
| 2hck_v |  |  | HCK_HUMAN |
| 1lbk_v |  |  | GSTP1_HUMAN |
| 1ya8_v |  |  | EST1_HUMAN |
| 1xf0_v |  |  | AK1C3_HUMAN |
| 2exm_v |  |  | P24941 |
| 1yb1_v |  |  | DHB11_HUMAN |
| 1xlw_v |  |  | CHLE_HUMAN |
| 1w8m_v |  |  | P62937 |
| 1bzm_v |  |  | CAH1_HUMAN |
| 1ogs_v |  |  | GLCM_HUMAN |
| 2ovm_v |  |  | PRGR_HUMAN |
| 1imb_v |  |  | IMPA1_HUMAN |
| 1reu_v |  |  | BMP2_HUMAN |
| 2obj_v |  |  | P11309 |
| 2itx_v |  |  | EGFR_HUMAN |
| 1wbo_v |  |  | Q16539 |
| 2f1g_v |  |  | CATS_HUMAN |
| 2pin_v |  |  | P10828 |
| 1oj9_v |  |  | AOFB_HUMAN |
| 1muo_v |  |  | STK6_HUMAN |
| 1pq9_v |  |  | NR1H2_HUMAN |
| 1vyw_v |  |  | CCNA2_HUMAN |
| 1jd0_v |  |  | CAH12_HUMAN |
| 1xn0_v |  |  | PDE4B_HUMAN |
| 1zgy_v |  |  | PPARG_HUMAN |
| 1lyw_v |  |  | CATD_HUMAN |
| 2vwu_v |  |  | EPHB4_HUMAN |
| 1pmu_v |  |  | MK10_HUMAN |
| 3eqm_v |  |  | P11511 |
| 2pg2_v |  |  | KIF11_HUMAN |
| 3dej_v |  |  | CASP3_HUMAN |
| 1vec_v |  |  | DDX6_HUMAN |
| 1xoz_v |  |  | PDE5A_HUMAN |
| 1fdu_v |  |  | P14061 |
| 1shj_v |  |  | CASP7_HUMAN |
| 1ov4_v |  |  | Q06520 |
| 1cb0_v |  |  | Q13126 |
| 3gam_v |  |  | P16083 |
| 3exo_v |  |  | P56817 |
| 3fzh_v |  |  | P11142 |
| 2wi1_v |  |  | NONE |
| 1hkb_v |  |  | HXK1_HUMAN |
| 1w6j_v |  |  | ERG7_HUMAN |
| 2gmx_v |  |  | MK08_HUMAN |
| 1lho_v |  |  | SHBG_HUMAN |
| 2abi_v |  |  | MCR_HUMAN |
| 1j78_v |  |  | VTDB_HUMAN |
| 1tg6_v |  |  | CLPP_HUMAN |
| 1mkd_v |  |  | PDE4D_HUMAN |
| 1n7i_v |  |  | PNMT_HUMAN |
| 1m9r_v |  |  | NOS3_HUMAN |
| 1a7a_v |  |  | SAHH_HUMAN |
| 2h8h_v |  |  | SRC_HUMAN |
| 1xdc_v |  |  | P04179 |
| 1k59_v |  |  | ANGI_HUMAN |
| 1qkt_v |  |  | ESR1_HUMAN |
| 1xan_v |  |  | P00390 |
| 1dic_v |  |  | CFAD_HUMAN |
| 1az1_v |  |  | ALDR_HUMAN |
| 1u3v_v |  |  | ADH1B_HUMAN |
| 1s5o_v |  |  | CACP_HUMAN |
| 1n83_v |  |  | RORA_HUMAN |
| 1fa9_v |  |  | P06737 |
| 1oiz_v |  |  | P49638 |
| 1le6_v |  |  | O15496 |
| 1csb_v |  |  | CATB_HUMAN |
| 1gyk_v |  |  | P02743 |
| 2jj3_v |  |  | ESR2_HUMAN |
| 5gal_v |  |  | LEG7_HUMAN |
| 1juj_v |  |  | TYSY_HUMAN |
| 1tg2_v |  |  | PH4H_HUMAN |
| 2acl_v |  |  | RXRA_HUMAN |
| 2iku_v |  |  | RENI_HUMAN |
| 1mvs_v |  |  | DYR_HUMAN |
| 830c_v |  |  | MMP13_HUMAN |
| 1p4f_v |  |  | DAPK1_HUMAN |
| 3blr_v |  |  | CCNT1_HUMAN |
| 1hak_v |  |  | ANXA5_HUMAN |
| 1zxc_v |  |  | ADA17_HUMAN |
| 1d7i_v |  |  | FKB1A_HUMAN |
| 1pl6_v |  |  | DHSO_HUMAN |
| 1a8j_v |  |  | P01709 |
| 2zas_v |  |  | P62508 |
| 1of7_v |  |  | ALDH2_HUMAN |
| 1gpz_v |  |  | P00736 |
| 2iej_v |  |  | FNTA_HUMAN |
| 1vjy_v |  |  | TGFR1_HUMAN |
| 3cqu_v |  |  | AKT1_HUMAN |
| 1waw_v |  |  | Q13231 |
| 1yc4_v |  |  | HS90A_HUMAN |
| 1w22_v |  |  | HDAC8_HUMAN |
| 3dy6_v |  |  | Q03181 |
| 1q6k_v |  |  | CATK_HUMAN |
| 1ih0_v |  |  | P63316 |
| 1s95_v |  |  | P53041 |
| 1hx1_v |  |  | BAG1_HUMAN |
| 1b6a_v |  |  | AMPM2_HUMAN |
| 1t7v_v |  |  | ZA2G_HUMAN |
| 1nrg_v |  |  | Q9NVS9 |
| 2rl5_v |  |  | P35968 |
| 1u81_v |  |  | P84077 |
| 1qdd_v |  |  | P05451 |
| 2f57_v |  |  | PAK7_HUMAN |
| 1gzr_v |  |  | P01343 |
| 1r0p_v |  |  | MET_HUMAN |
| 1ydt_v |  |  | P00517 |
| 1uou_v |  |  | TYPH_HUMAN |
| 2fb8_v |  |  | BRAF1_HUMAN |
| 1q22_v |  |  | O00204 |
| 1nfu_v |  |  | FA10_HUMAN |
| 3czr_v |  |  | DHI1_HUMAN |
| 1zs0_v |  |  | MMP8_HUMAN |
| 1v84_v |  |  | B3GA1_HUMAN |
| 1m4u_v |  |  | BMP7_HUMAN |
| 1uv5_v |  |  | GSK3B_HUMAN |
| 1kak_v |  |  | PTN1_HUMAN |
| 1m51_v |  |  | P35558 |
| 2r7b_v |  |  | PDPK1_HUMAN |
| 1mu6_v |  |  | THRB_HUMAN |
| 1so2_v |  |  | PDE3B_HUMAN |
| 1ca7_v |  |  | MIF_HUMAN |
| 3h30_v |  |  | P68400 |
| 1n1m_v |  |  | DPP4_HUMAN |
| 1t84_v |  |  | WASP_HUMAN |
| 1osh_v |  |  | NR1H4_HUMAN |
| 1fo2_v |  |  | Q9UKM7 |
| 1isg_v |  |  | BST1_HUMAN |
| 1u3w_v |  |  | P00326 |
| 1utt_v |  |  | MMP12_HUMAN |
| 1f5l_v |  |  | UROK_HUMAN |
| 2shp_v |  |  | PTN11_HUMAN |
| 1ctr_v |  |  | CALM_HUMAN |
| 1u4l_v |  |  | CCL5_HUMAN |
| 1qpd_v |  |  | LCK_HUMAN |
| 1wlj_v |  |  | ISG20_HUMAN |
| 1fe0_v |  |  | O00244 |
| 1gse_v |  |  | P08263 |
| 3cpu_v |  |  | AMYP_HUMAN |
| 1o6u_v |  |  | O76054 |
| 1g8i_v |  |  | NCS1_HUMAN |
| 1sz7_v |  |  | O43617 |
| 1dcy_v |  |  | P14555 |
| 1wok_v |  |  | P09874 |
| 1d3h_v |  |  | PYRD_HUMAN |
| 1o7a_v |  |  | P07686 |
| 1agw_v |  |  | FGFR1_HUMAN |
| 1mq0_v |  |  | CDD_HUMAN |
| 1kta_v |  |  | O15382 |
| 1xvp_v |  |  | NR1I3_HUMAN |
| 1vj5_v |  |  | HYES_HUMAN |
| 1u4d_v |  |  | ACK1_HUMAN |
| 2rnf_v |  |  | P34096 |
| 1h1b_v |  |  | ELNE_HUMAN |
| 2fhi_v |  |  | P49789 |
| 1t2f_v |  |  | P07195 |
| 1yvj_v |  |  | JAK3_HUMAN |
| 1hlc_v |  |  | LEG2_HUMAN |
| 1c9y_v |  |  | P00480 |
| 1sm2_v |  |  | Q08881 |
| 1oec_v |  |  | P21802 |
| 1nup_v |  |  | Q96T66 |
| 1o1v_v |  |  | FABP6_HUMAN |
| 1cgh_v |  |  | CATG_HUMAN |
| 1kv3_v |  |  | TGM2_HUMAN |
| 1mkp_v |  |  | DUS6_HUMAN |
| 2c47_v |  |  | KC1G2_HUMAN |
| 1ma0_v |  |  | ADHX_HUMAN |
| 1rd4_v |  |  | ITAL_HUMAN |
| 1dxo_v |  |  | NQO1_HUMAN |
| 1kmq_v |  |  | P61586 |
| 1iz2_v |  |  | A1AT_HUMAN |
| 1ne7_v |  |  | P46926 |
| 1np0_v |  |  | P07686 |
| 1xbc_v |  |  | KSYK_HUMAN |
| 1b3o_v |  |  | IMDH2_HUMAN |
| 1bj4_v |  |  | GLYC_HUMAN |
| 1kjl_v |  |  | LEG3_HUMAN |
| 1uhl_v |  |  | NR1H3_HUMAN |
| 1xtq_v |  |  | Q15382 |
| 1q11_v |  |  | P54577 |
| 1m48_v |  |  | IL2_HUMAN |
| 3dz6_v |  |  | P17707 |
| 1tjj_v |  |  | P17900 |
| 1wma_v |  |  | CBR1_HUMAN |
| 1e8z_v |  |  | PK3CG_HUMAN |
| 1wuu_v |  |  | GALK1_HUMAN |
| 1mlw_v |  |  | TPH1_HUMAN |
| 1nhz_v |  |  | GCR_HUMAN |
| 1hov_v |  |  | MMP2_HUMAN |
| 1nav_v |  |  | P10827 |
| 1h6g_v |  |  | CTNA1_HUMAN |
| 1d7x_v |  |  | MMP3_HUMAN |
| 2o9i_v |  |  | NR1I2_HUMAN |
| 1mrq_v |  |  | Q04828 |
| 1w8b_v |  |  | FA7_HUMAN |
| 1gz4_v |  |  | MAOM_HUMAN |
| 3f5p_v |  |  | P08069 |
| 4nos_v |  |  | NOS2_HUMAN |
| 2i6b_v |  |  | P55263 |
| 1fzv_v |  |  | PLGF_HUMAN |
| 1p5z_v |  |  | DCK_HUMAN |
| 2vcx_v |  |  | PTGD2_HUMAN |
| 2rku_v |  |  | P53350 |
| 1i7g_v |  |  | PPARA_HUMAN |
| 1r7y_v |  |  | P16442 |
| 1he3_v |  |  | P30043 |
| 1dia_v |  |  | P11586 |
| 1hmt_v |  |  | FABPH_HUMAN |
| 1fe3_v |  |  | FABP7_HUMAN |
| 1pq2_v |  |  | CP2C8_HUMAN |
| 3d2e_v |  |  | P32589 |
| 1mfv_v |  |  | P04745 |
| 1hti_v |  |  | TPIS_HUMAN |
| 1xo2_v |  |  | CDK6_HUMAN |
| 1lzj_v |  |  | Q9NY01 |
| 1iri_v |  |  | G6PI_HUMAN |
| 2q6c_v |  |  | HMDH_HUMAN |
| 1h1h_v |  |  | P12724 |
| 1og5_v |  |  | CP2C9_HUMAN |
| 1lv2_v |  |  | Q14541 |
| 1wda_v |  |  | PADI4_HUMAN |
| 2bu5_v |  |  | PDK2_HUMAN |
| 4ald_v |  |  | ALDOA_HUMAN |
| 1u59_v |  |  | ZAP70_HUMAN |
| 2p4i_v |  |  | TIE2_HUMAN |
| 1rbp_v |  |  | RET4_HUMAN |
| 1rv1_v |  |  | MDM2_HUMAN |
| 2hpa_v |  |  | PPAP_HUMAN |
| 3bbt_v |  |  | ERBB4_HUMAN |
| 1k9j_v |  |  | Q9H2X3 |
| 1uej_v |  |  | Q9BZX2 |
| 1rem_v |  |  | P61626 |
| 1elv_v |  |  | C1S_HUMAN |
| 1xjd_v |  |  | KPCT_HUMAN |
| 1oix_v |  |  | RB11A_HUMAN |
| 1lf7_v |  |  | P07360 |
| 1fd0_v |  |  | RARG_HUMAN |
| 1tou_v |  |  | FABP4_HUMAN |
| 1l9n_v |  |  | TGM3_HUMAN |
| 3g3m_v |  |  | P11172 |
| 1yq7_v |  |  | FPPS_HUMAN |
| 2pjl_v |  |  | P11474 |
| 1cbs_v |  |  | P29373 |
| 1n6i_v |  |  | RAB5A_HUMAN |
| 1dkf_v |  |  | RARA_HUMAN |
| 1g3m_v |  |  | ST1E1_HUMAN |
| 2c30_v |  |  | PAK6_HUMAN |
| 1mqb_v |  |  | EPHA2_HUMAN |
| 1zdz_v |  |  | P19623 |
| 1pkg_v |  |  | KIT_HUMAN |
| 1tx4_v |  |  | Q07960 |
| 1jcn_v |  |  | IMDH1_HUMAN |
| 2rjp_v |  |  | ATS4_HUMAN |
| 1gzu_v |  |  | Q9HAN9 |
| 2f4j_v |  |  | P00519 |
| 2opy_v |  |  | XIAP_HUMAN |
| 2b7a_v |  |  | JAK2_HUMAN |
| 3d7t_v |  |  | CSK_HUMAN |
| 1v4s_v |  |  | HXK4_HUMAN |
| 1qip_v |  |  | LGUL_HUMAN |
| 1hrk_v |  |  | P22830 |
| 1o5f_v |  |  | P05981 |
| 1pq3_v |  |  | ARGI2_HUMAN |
| 1uzf_v |  |  | ACE_HUMAN |
| 1x89_v |  |  | NGAL_HUMAN |
| 1jqe_v |  |  | P50135 |
| 1g1r_v |  |  | LYAM3_HUMAN |
| 2i3i_v |  |  | Q96CA5 |
| 1gkd_v |  |  | MMP9_HUMAN |
| 1i3n_v |  |  | GALE_HUMAN |
| 1onq_v |  |  | CD1A_HUMAN |
| 1tfg_v |  |  | TGFB2_HUMAN |
| 1p5j_v |  |  | P20132 |
| 1n69_v |  |  | P07602 |
| 1ni4_v |  |  | P11177 |
| 1yvl_v |  |  | STAT1_HUMAN |
| 1w7n_v |  |  | KAT1_HUMAN |
| 1q91_v |  |  | Q9NPB1 |
| 1kpe_v |  |  | HINT1_HUMAN |
| 1xwk_v |  |  | GSTM1_HUMAN |

Table S2: Lymphoma-related genes gained from GeneCard database.

| Gene Symbol |  | GC Id |
| --- | --- | --- |
| *BCL6* |  | GC03M187721 |
| *ALK* |  | GC02M029156 |
| *MYC* |  | GC08P127735 |
| *BCL2* |  | GC18M063123 |
| *BCL10* |  | GC01M085265 |
| *PAX5* |  | GC09M036828 |
| *TP53* |  | GC17M007661 |
| *MALT1* |  | GC18P058671 |
| *CCND1* |  | GC11P069641 |
| *ATM* |  | GC11P108222 |
| *FAS* |  | GC10P088969 |
| *STAT3* |  | GC17M042313 |
| *IGH* |  | GC14M109514 |
| *TCL1A* |  | GC14M095709 |
| *MYD88* |  | GC03P038179 |
| *MS4A1* |  | GC11P060474 |
| *BIRC3* |  | GC11P102317 |
| *CDKN2A* |  | GC09M021967 |
| *CD19* |  | GC16P029083 |
| *BAX* |  | GC19P048954 |
| *NPM1* |  | GC05P171387 |
| *MIR155* |  | GC21P025573 |
| *B2M* |  | GC15P044711 |
| *CD40LG* |  | GC0XP136649 |
| *SH2D1A* |  | GC0XP124227 |
| *IL6* |  | GC07P022765 |
| *IL10* |  | GC01M206767 |
| *CR2* |  | GC01P207454 |
| *TNFRSF8* |  | GC01P012063 |
| *XIAP* |  | GC0XP123859 |
| *CASP10* |  | GC02P201182 |
| *MDM2* |  | GC12P068808 |
| *FOXP1* |  | GC03M070926 |
| *ADA* |  | GC20M044620 |
| *CTLA4* |  | GC02P203867 |
| *KLHDC8B* |  | GC03P049171 |
| *CD28* |  | GC02P203706 |
| *CXCR5* |  | GC11P118898 |
| *PTEN* |  | GC10P087863 |
| *TNFRSF13C* |  | GC22M045411 |
| *RB1* |  | GC13P048303 |
| *CD27* |  | GC12P008144 |
| *MIR17* |  | GC13P091350 |
| *IRF4* |  | GC06P000391 |
| *MME* |  | GC03P155024 |
| *BRAF* |  | GC07M140719 |
| *EZH2* |  | GC07M148807 |
| *PMS2* |  | GC07M005973 |
| *BCR* |  | GC22P023179 |
| *IKZF1* |  | GC07P050303 |
| *MYB* |  | GC06P135180 |
| *PTPRC* |  | GC01P198607 |
| *MSH2* |  | GC02P047402 |
| *KIT* |  | GC04P054657 |
| *NBN* |  | GC08M089933 |
| *ZAP70* |  | GC02P097696 |
| *TNFRSF1B* |  | GC01P012167 |
| *BCL3* |  | GC19P044747 |
| *ITK* |  | GC05P157158 |
| *APC* |  | GC05P112707 |
| *CD40* |  | GC20P046118 |
| *CD5* |  | GC11P061114 |
| *ABL1* |  | GC09P130713 |
| *PIK3CA* |  | GC03P179148 |
| *TRB* |  | GC07P145138 |
| *PRF1* |  | GC10M070597 |
| *NFKB2* |  | GC10P102394 |
| *TIA1* |  | GC02M070209 |
| *CSF3* |  | GC17P040015 |
| *GZMB* |  | GC14M024630 |
| *FGFR1* |  | GC08M038400 |
| *ETV6* |  | GC12P011649 |
| *RASGRP1* |  | GC15M038488 |
| *IL2* |  | GC04M122451 |
| *HAVCR2* |  | GC05M157063 |
| *BCL7A* |  | GC12P122019 |
| *IL2RA* |  | GC10M006010 |
| *BCL2L1* |  | GC20M031664 |
| *NRAS* |  | GC01M114704 |
| *TAL1* |  | GC01M047216 |
| *FASLG* |  | GC01P172628 |
| *RAG1* |  | GC11P036514 |
| *CCND3* |  | GC06M041934 |
| *CDKN1B* |  | GC12P012716 |
| *RAD54B* |  | GC08M094371 |
| *KMT2A* |  | GC11P118436 |
| *AICDA* |  | GC12M008602 |
| *CXCL13* |  | GC04P077511 |
| *PTPN11* |  | GC12P112418 |
| *CD274* |  | GC09P005450 |
| *MCL1* |  | GC01M150707 |
| *HLA-DRB1* |  | GC06M032578 |
| *MIR143* |  | GC05P149410 |
| *MIR34A* |  | GC01M009151 |
| *MIR20A* |  | GC13P091434 |
| *CD70* |  | GC19M006583 |
| *PRDM1* |  | GC06P105993 |
| *TRG* |  | GC07M038240 |
| *TIAM1* |  | GC21M031118 |
| *TNF* |  | GC06P047305 |
| *CARD11* |  | GC07M002906 |
| *REL* |  | GC02P060881 |
| *FLT3* |  | GC13M028003 |
| *CASP3* |  | GC04M184627 |
| *CDKN2B* |  | GC09M022002 |
| *CD79A* |  | GC19P041877 |
| *RHOH* |  | GC04P040192 |
| *CDK4* |  | GC12M057743 |
| *CXCR4* |  | GC02M136114 |
| *CBL* |  | GC11P119206 |
| *BCL11B* |  | GC14M099169 |
| *CCR6* |  | GC06P167111 |
| *GATA3* |  | GC10P008045 |
| *MSH6* |  | GC02P047695 |
| *BCL11A* |  | GC02M060451 |
| *CHEK2* |  | GC22M028687 |
| *SYK* |  | GC09P091171 |
| *IL4* |  | GC05P132673 |
| *BMI1* |  | GC10P022326 |
| *TET2* |  | GC04P105145 |
| *AKT1* |  | GC14M104769 |
| *CCND2* |  | GC12P008103 |
| *TLX1* |  | GC10P101130 |
| *CASP8* |  | GC02P201233 |
| *PRKCD* |  | GC03P053156 |
| *BCL7B* |  | GC07M073536 |
| *CD44* |  | GC11P035139 |
| *MIR21* |  | GC17P059841 |
| *NOTCH1* |  | GC09M136602 |
| *TNFSF13B* |  | GC13P108251 |
| *IL7* |  | GC08M078689 |
| *CD4* |  | GC12P006786 |
| *RAD54L* |  | GC01P046258 |
| *BCL7C* |  | GC16M030834 |
| *IFNA1* |  | GC09P021494 |
| *GCSAM* |  | GC03M112120 |
| *CCR4* |  | GC03P032951 |
| *MYCN* |  | GC02P015949 |
| *MIR145* |  | GC05P149430 |
| *BTK* |  | GC0XM101349 |
| *TNFSF8* |  | GC09M114893 |
| *CD22* |  | GC19P035319 |
| *CDK6* |  | GC07M092604 |
| *IL7R* |  | GC05P035852 |
| *CSF2* |  | GC05P132073 |
| *BIRC5* |  | GC17P078214 |
| *PDCD1* |  | GC02M241849 |
| *CD7* |  | GC17M082314 |
| *SPN* |  | GC16P029662 |
| *KRAS* |  | GC12M025204 |
| *RUNX1* |  | GC21M034787 |
| *CD38* |  | GC04P015779 |
| *CXCR3* |  | GC0XM071615 |
| *ABCB1* |  | GC07M087504 |
| *DNTT* |  | GC10P096304 |
| *JAK3* |  | GC19M017824 |
| *FCER2* |  | GC19M007689 |
| *NFKBIA* |  | GC14M035401 |
| *PIK3R1* |  | GC05P068215 |
| *PNP* |  | GC14P020468 |
| *MIR17HG* |  | GC13P091347 |
| *JAK2* |  | GC09P004985 |
| *FL1* |  | GC06U901764 |
| *CDKN1A* |  | GC06P047460 |
| *TNFRSF13B* |  | GC17M016929 |
| *PVT1* |  | GC08P127804 |
| *SDC1* |  | GC02M020200 |
| *CFLAR* |  | GC02P201117 |
| *BCL9* |  | GC01P147541 |
| *EGFR* |  | GC07P055019 |
| *XPO1* |  | GC02M061445 |
| *CD79B* |  | GC17M063928 |
| *MIRLET7C* |  | GC21P016551 |
| *MIR15A* |  | GC13M050049 |
| *BCL2L11* |  | GC02P111119 |
| *CD8A* |  | GC02M086784 |
| *CCL17* |  | GC16P057400 |
| *BIRC2* |  | GC11P102347 |
| *TIAM2* |  | GC06P154832 |
| *TCF3* |  | GC19M001609 |
| *MAGT1* |  | GC0XM077826 |
| *TNFAIP3* |  | GC06P137866 |
| *MTOR* |  | GC01M011106 |
| *BRCA2* |  | GC13P032315 |
| *RHOA* |  | GC03M049359 |
| *MIR34B* |  | GC11P111546 |
| *NCAM1* |  | GC11P112961 |
| *PICALM* |  | GC11M085957 |
| *VEGFA* |  | GC06P043770 |
| *CASP9* |  | GC01M015491 |
| *PIK3CD* |  | GC01P009629 |
| *PARP9* |  | GC03M122527 |
| *IL15* |  | GC04P141636 |
| *CTAGE1* |  | GC18M022413 |
| *MIR106A* |  | GC0XM134219 |
| *HRAS* |  | GC11M000635 |
| *UNC13D* |  | GC17M075827 |
| *CCR7* |  | GC17M040556 |
| *TCL6* |  | GC14P095650 |
| *LYN* |  | GC08P055879 |
| *MGMT* |  | GC10P129467 |
| *PARP1* |  | GC01M226360 |
| *STAT6* |  | GC12M057095 |
| *ACTB* |  | GC07M005527 |
| *IGHV4-38-2* |  | GC14U901616 |
| *HSP90AA1* |  | GC14M102080 |
| *TNFRSF1A* |  | GC12M006328 |
| *KDM4C* |  | GC09P006720 |
| *IL3* |  | GC05P132060 |
| *IL2RB* |  | GC22M037125 |
| *TRAF1* |  | GC09M120902 |
| *IL9* |  | GC05M135891 |
| *ICAM1* |  | GC19P010270 |
| *IGHM* |  | GC14M109532 |
| *IFNG* |  | GC12M068064 |
| *MIR342* |  | GC14P100109 |
| *MUC1* |  | GC01M155185 |
| *SOX11* |  | GC02P005703 |
| *FOXP3* |  | GC0XM049250 |
| *JUNB* |  | GC19P012791 |
| *ANXA5* |  | GC04M121667 |
| *ICOSLG* |  | GC21M044222 |
| *KDSR* |  | GC18M063327 |
| *TRAF6* |  | GC11M036467 |
| *CD80* |  | GC03M119524 |
| *BLM* |  | GC15P090717 |
| *MIR142* |  | GC17M058331 |
| *POU2AF1* |  | GC11M111352 |
| *MIR424* |  | GC0XM134627 |
| *STXBP2* |  | GC19P007637 |
| *FSCN1* |  | GC07P005592 |
| *DCLRE1C* |  | GC10M014897 |
| *CD55* |  | GC01P207321 |
| *ZBTB16* |  | GC11P114059 |
| *MAPK8* |  | GC10P048306 |
| *PBX1* |  | GC01P164524 |
| *SELL* |  | GC01M169690 |
| *ZC3H12D* |  | GC06M149446 |
| *SPI1* |  | GC11M061125 |
| *STAT5A* |  | GC17P042287 |
| *ZMYM2* |  | GC13P019958 |
| *SLC22A2* |  | GC06M160173 |
| *RECQL4* |  | GC08M144512 |
| *CDK2* |  | GC12P055966 |
| *MIR16-1* |  | GC13M050048 |
| *CIITA* |  | GC16P010879 |
| *CCNA2* |  | GC04M121816 |
| *CXCL12* |  | GC10M044294 |
| *DPP4* |  | GC02M161992 |
| *BCL6B* |  | GC17P007023 |
| *NFKB1* |  | GC04P102501 |
| *CSF1R* |  | GC05M150053 |
| *CD68* |  | GC17P007579 |
| *STX11* |  | GC06P144150 |
| *POLE* |  | GC12M132624 |
| *IL13* |  | GC05P132656 |
| *TERT* |  | GC05M001253 |
| *RNF213* |  | GC17P080260 |
| *FCGR3A* |  | GC01M161541 |
| *CYCS* |  | GC07M025118 |
| *JAK1* |  | GC01M064833 |
| *VIM* |  | GC10P017227 |
| *IL5* |  | GC05M132541 |
| *LIG4* |  | GC13M108207 |
| *CHUK* |  | GC10M100188 |
| *MLLT10* |  | GC10P021524 |
| *PIM2* |  | GC0XM048913 |
| *LMO2* |  | GC11M033858 |
| *TCL1B* |  | GC14P095686 |
| *CD52* |  | GC01P026317 |
| *MIR155HG* |  | GC21P025561 |
| *ITGAL* |  | GC16P030472 |
| *TRD* |  | GC14P022425 |
| *ANPEP* |  | GC15M089784 |
| *PLK1* |  | GC16P023888 |
| *IFNA2* |  | GC09M021384 |
| *FCRL5* |  | GC01M157477 |
| *KMT2D* |  | GC12M049018 |
| *TNFRSF10A* |  | GC08M023190 |
| *E2F1* |  | GC20M033675 |
| *MIR181A1* |  | GC01M198860 |
| *MLH1* |  | GC03P036993 |
| *CD59* |  | GC11M033704 |
| *BRCA1* |  | GC17M043044 |
| *HLA-DQB1* |  | GC06M032804 |
| *FCGR2B* |  | GC01P161663 |
| *PASD1* |  | GC0XP151563 |
| *TRAF3* |  | GC14P104639 |
| *PMAIP1* |  | GC18P059899 |
| *CDK1* |  | GC10P060772 |
| *WWOX* |  | GC16P078099 |
| *BAK1* |  | GC06M033572 |
| *TNFRSF10B* |  | GC08M023020 |
| *NME1* |  | GC17P051154 |
| *HLA-C* |  | GC06M031272 |
| *MAPK1* |  | GC22M021754 |
| *MIR200B* |  | GC01P001167 |
| *TP73* |  | GC01P003652 |
| *JUN* |  | GC01M058780 |
| *LTA* |  | GC06P047303 |
| *TP63* |  | GC03P189598 |
| *ITGA4* |  | GC02P181456 |
| *PIM1* |  | GC06P047469 |
| *MIA2* |  | GC14P039230 |
| *H2AC18* |  | GC01M149961 |
| *TYK2* |  | GC19M010350 |
| *SOCS1* |  | GC16M011255 |
| *PDCD1LG2* |  | GC09P005510 |
| *IL6R* |  | GC01P154405 |
| *YY1* |  | GC14P100238 |
| *CRLF2* |  | GC0XM001190 |
| *CD2* |  | GC01P116754 |
| *MIR150* |  | GC19M049500 |
| *TNFSF10* |  | GC03M172505 |
| *GSTM1* |  | GC01P109687 |
| *VAV1* |  | GC19P006772 |
| *ITGB1* |  | GC10M032900 |
| *CHRDL1* |  | GC0XM110674 |
| *AFF1* |  | GC04P086934 |
| *LYST* |  | GC01M235661 |
| *XBP1* |  | GC22M028794 |
| *ITGAX* |  | GC16P031570 |
| *DNMT1* |  | GC19M010133 |
| *CEBPA* |  | GC19M033299 |
| *RIPK1* |  | GC06P003064 |
| *LGALS1* |  | GC22P037675 |
| *SIRT1* |  | GC10P067884 |
| *BAD* |  | GC11M064273 |
| *CCR5* |  | GC03P046383 |
| *FOS* |  | GC14P075278 |
| *ITGAE* |  | GC17M003722 |
| *CDKN2C* |  | GC01P050960 |
| *TCF4* |  | GC18M055222 |
| *FRAT1* |  | GC10P097319 |
| *ZMYND8* |  | GC20M047209 |
| *IKZF3* |  | GC17M039759 |
| *MAP2K1* |  | GC15P066386 |
| *MIR199A1* |  | GC19M010792 |
| *TLR9* |  | GC03M052222 |
| *FUT4* |  | GC11P094544 |
| *MIR149* |  | GC02P240456 |
| *TFRC* |  | GC03M196027 |
| *TLR4* |  | GC09P117704 |
| *MPO* |  | GC17M058269 |
| *SKP2* |  | GC05P036103 |
| *BVR1* |  | GC08U990007 |
| *TRAF2* |  | GC09P136881 |
| *RAG2* |  | GC11M036575 |
| *TFG* |  | GC03P100709 |
| *GBA* |  | GC01M155234 |
| *NQO1* |  | GC16M069706 |
| *GAPDH* |  | GC12P008161 |
| *CCNG1* |  | GC05P163438 |
| *CD34* |  | GC01M207880 |
| *HSD17B11* |  | GC04M087336 |
| *HLA-A* |  | GC06P047265 |
| *IGKC* |  | GC02M089142 |
| *ICOS* |  | GC02P203937 |
| *CTAGE3P* |  | GC13M051907 |
| *PDGFRA* |  | GC04P054229 |
| *IKBKG* |  | GC0XP154541 |
| *CD86* |  | GC03P122055 |
| *MIR30A* |  | GC06M071403 |
| *FCRL4* |  | GC01M157543 |
| *HLF* |  | GC17P055264 |
| *TLR2* |  | GC04P153684 |
| *PPID* |  | GC04M158709 |
| *MNDA* |  | GC01P158801 |
| *CLU* |  | GC08M027596 |
| *CTNNB1* |  | GC03P041236 |
| *CTAGE4* |  | GC07P144183 |
| *CCL3* |  | GC17M036088 |
| *KITLG* |  | GC12M088492 |
| *STAT5B* |  | GC17M042199 |
| *DUSP22* |  | GC06P000292 |
| *DICER1* |  | GC14M095086 |
| *MKI67* |  | GC10M128096 |
| *IL2RG* |  | GC0XM071108 |
| *CDH1* |  | GC16P068737 |
| *CR1* |  | GC01P207496 |
| *HLA-B* |  | GC06M031315 |
| *TOP1* |  | GC20P041028 |
| *IGF1R* |  | GC15P098648 |
| *DNMT3A* |  | GC02M025228 |
| *MIR127* |  | GC14P104580 |
| *MIR126* |  | GC09P136670 |
| *MIR18A* |  | GC13P091432 |
| *TPMT* |  | GC06M018128 |
| *MIR139* |  | GC11M072615 |
| *DUSP5* |  | GC10P110497 |
| *MIR140* |  | GC16P069934 |
| *CCR10* |  | GC17M042678 |
| *CHEK1* |  | GC11P125625 |
| *NR4A1* |  | GC12P052022 |
| *MIR223* |  | GC0XP066018 |
| *S100A8* |  | GC01M153391 |
| *LCK* |  | GC01P032251 |
| *APAF1* |  | GC12P098645 |
| *TLX3* |  | GC05P171309 |
| *PRODH* |  | GC22M018912 |
| *DNMT3B* |  | GC20P032762 |
| *MPP1* |  | GC0XM154779 |
| *MIR222* |  | GC0XM045747 |
| *MIR210* |  | GC11M000674 |
| *MIR338* |  | GC17M081126 |
| *NKAIN2* |  | GC06P123803 |
| *HDAC9* |  | GC07P018086 |
| *MET* |  | GC07P116672 |
| *CD24* |  | GC06M106969 |
| *RELB* |  | GC19P045002 |
| *DAPK1* |  | GC09P087497 |
| *SERPINA3* |  | GC14P094612 |
| *DIABLO* |  | GC12M122208 |
| *BATF* |  | GC14P075523 |
| *SRSF2* |  | GC17M076734 |
| *RBL2* |  | GC16P053433 |
| *GNB1* |  | GC01M001785 |
| *BACH2* |  | GC06M089926 |
| *ID3* |  | GC01M023557 |
| *ITGAM* |  | GC16P031550 |
| *CCDC68* |  | GC18M054901 |
| *PLCG1* |  | GC20P041136 |
| *CYP3A4* |  | GC07M099759 |
| *CDKN3* |  | GC14P054398 |
| *MADCAM1* |  | GC19P000499 |
| *MTHFR* |  | GC01M011785 |
| *CDC25A* |  | GC03M048173 |
| *ZNF638* |  | GC02P071276 |
| *MIR203A* |  | GC14P104655 |
| *CDKN1C* |  | GC11M002887 |
| *GAS5* |  | GC01M173947 |
| *U2AF1* |  | GC21M043092 |
| *CBLB* |  | GC03M105655 |
| *TLR1* |  | GC04M038797 |
| *MIR9-1* |  | GC01M156420 |
| *ATP12A* |  | GC13P024680 |
| *ATP4A* |  | GC19M042544 |
| *EP300* |  | GC22P041091 |
| *GNA13* |  | GC17M065009 |
| *MYBL1* |  | GC08M066596 |
| *STAT1* |  | GC02M190908 |
| *PECAM1* |  | GC17M064319 |
| *HPRT1* |  | GC0XP134460 |
| *TP53COR1* |  | GC06U903133 |
| *STIL* |  | GC01M047250 |
| *CARD10* |  | GC22M045384 |
| *POU2F2* |  | GC19M042086 |
| *CORO1A* |  | GC16P030194 |
| *FCGR2A* |  | GC01P161505 |
| *ENO2* |  | GC12P006913 |
| *CD200* |  | GC03P112332 |
| *MIR214* |  | GC01M172234 |
| *CXCL10* |  | GC04M076021 |
| *IGF1* |  | GC12M102395 |
| *THY1* |  | GC11M119417 |
| *RPS6KB1* |  | GC17P059893 |
| *TNFRSF17* |  | GC16P011965 |
| *NME2* |  | GC17P051165 |
| *EML4* |  | GC02P042169 |
| *ABCC1* |  | GC16P015949 |
| *RET* |  | GC10P043081 |
| *RELA* |  | GC11M065653 |
| *SLC35B2* |  | GC06M044254 |
| *MALAT1* |  | GC11P065806 |
| *GSTP1* |  | GC11P067583 |
| *MIR200A* |  | GC01P001463 |
| *RAF1* |  | GC03M012583 |
| *PCSK7* |  | GC11M117199 |
| *DDX3X* |  | GC0XP041333 |
| *POLM* |  | GC07M044074 |
| *DKC1* |  | GC0XP154762 |
| *ZBTB7A* |  | GC19M004045 |
| *MIR320A* |  | GC08M022246 |
| *DDX41* |  | GC05M177511 |
| *MIR151A* |  | GC08M140733 |
| *HSPD1* |  | GC02M197486 |
| *KIR3DL2* |  | GC19P055444 |
| *PCNA* |  | GC20M005114 |
| *MIR28* |  | GC03P188688 |
| *CCL22* |  | GC16P057359 |
| *IL4R* |  | GC16P027325 |
| *FADD* |  | GC11P070203 |
| *MCTS1* |  | GC0XP120594 |
| *NEAT1* |  | GC11P065794 |
| *BCL9L* |  | GC11M118893 |
| *NT5C2* |  | GC10M103088 |
| *XRCC4* |  | GC05P083077 |
| *NUP214* |  | GC09P131125 |
| *PTHLH* |  | GC12M027959 |
| *RMRP* |  | GC09M035655 |
| *CDC25C* |  | GC05M138285 |
| *NAT1* |  | GC08P018179 |
| *CASP7* |  | GC10P113679 |
| *TGFBR1* |  | GC09P099104 |
| *PCGF2* |  | GC17M038733 |
| *ACVRL1* |  | GC12P051906 |
| *CREBBP* |  | GC16M003726 |
| *PLCG2* |  | GC16P081773 |
| *TOP2A* |  | GC17M040388 |
| *PCM1* |  | GC08P017922 |
| *MINCR* |  | GC08M143281 |
| *MIR130B* |  | GC22P024903 |
| *SCLL* |  | GC08U901516 |
| *RYBP* |  | GC03M072371 |
| *WAS* |  | GC0XP048676 |
| *BCL2L2* |  | GC14P025306 |
| *HLA-DQA1* |  | GC06P047340 |
| *PLS3* |  | GC0XP115560 |
| *NOTCH2* |  | GC01M119911 |
| *GALK1* |  | GC17M075751 |
| *SIGLEC5* |  | GC19M051611 |
| *GSTT1* |  | GC22Mi00270 |
| *HSPA4* |  | GC05P133051 |
| *SOD2* |  | GC06M159669 |
| *CD33* |  | GC19P051212 |
| *MEF2B* |  | GC19M019150 |
| *FBXO11* |  | GC02M047789 |
| *LINC01194* |  | GC05P012578 |
| *IL16* |  | GC15P081159 |
| *ALB* |  | GC04P073397 |
| *EIF4E* |  | GC04M098871 |
| *EIF4EBP1* |  | GC08P038007 |
| *FAS-AS1* |  | GC10M088991 |
| *MIR92A1* |  | GC13P091431 |
| *CARTPT* |  | GC05P071719 |
| *MAP2K2* |  | GC19M004090 |
| *FBXW7* |  | GC04M152321 |
| *HOXC6* |  | GC12P053990 |
| *MIR27A* |  | GC19M014010 |
| *MIR30B* |  | GC08M134800 |
| *MIR125A* |  | GC19P051720 |
| *CXCL8* |  | GC04P073740 |
| *HOTAIR* |  | GC12M053962 |
| *KDR* |  | GC04M055078 |
| *MIR520A* |  | GC19P053690 |
| *MIR152* |  | GC17M048037 |
| *MIR186* |  | GC01M071067 |
| *MIR574* |  | GC04P038872 |
| *MIR374A* |  | GC0XM074296 |
| *ALL1* |  | GC10U901237 |
| *ALL2* |  | GC07U902668 |
| *CXCL9* |  | GC04M076001 |
| *PTCH1* |  | GC09M095442 |
| *TYMS* |  | GC18P000657 |
| *MRE11* |  | GC11M094444 |
| *TRA* |  | GC14P021621 |
| *MSN* |  | GC0XP065588 |
| *BCL2A1* |  | GC15M079961 |
| *LEF1* |  | GC04M108047 |
| *ANXA1* |  | GC09P073151 |
| *FLT3LG* |  | GC19P049475 |
| *MTAP* |  | GC09P021792 |
| *ATR* |  | GC03M142449 |
| *TNFRSF14* |  | GC01P002555 |
| *NCOR2* |  | GC12M124324 |
| *GPR15* |  | GC03P098531 |
| *MIR196A1* |  | GC17M048632 |
| *MIR614* |  | GC12P012923 |
| *MIR31* |  | GC09M021513 |
| *SLAMF1* |  | GC01M160608 |
| *PRMT5* |  | GC14M022920 |
| *NBEAP1* |  | GC15M020657 |
| *TERC* |  | GC03M169765 |
| *ROR1* |  | GC01P063774 |
| *NR3C1* |  | GC05M143277 |
| *H2AX* |  | GC11M119097 |
| *MIR29B1* |  | GC07M130877 |
| *HOXC4* |  | GC12P054016 |
| *WRN* |  | GC08P031033 |
| *ASXL1* |  | GC20P032359 |
| *MIR23B* |  | GC09P095085 |
| *DCK* |  | GC04P070992 |
| *FGFR3* |  | GC04P001795 |
| *CCR3* |  | GC03P046227 |
| *CD46* |  | GC01P207752 |
| *HOXC5* |  | GC12P054204 |
| *VDR* |  | GC12M047841 |
| *IL10RA* |  | GC11P117987 |
| *MIR146B* |  | GC10P102436 |
| *XRCC1* |  | GC19M043543 |
| *SLAMF7* |  | GC01P160709 |
| *COL14A1* |  | GC08P120062 |
| *AAGAB* |  | GC15M067200 |
| *RNF43* |  | GC17M058352 |
| *MIR221* |  | GC0XM045746 |
| *BLNK* |  | GC10M096198 |
| *SLC19A1* |  | GC21M045493 |
| *CYP1A1* |  | GC15M074719 |
| *SETD2* |  | GC03M047033 |
| *MIR15B* |  | GC03P160404 |
| *WIPF1* |  | GC02M174559 |
| *CYP3A5* |  | GC07M099648 |
| *FPGS* |  | GC09P127794 |
| *PRKCB* |  | GC16P023892 |
| *ASNS* |  | GC07M097854 |
| *CD69* |  | GC12M013857 |
| *CD81* |  | GC11P002377 |
| *WRAP53* |  | GC17P008049 |
| *USB1* |  | GC16P057999 |
| *MYOM2* |  | GC08P002045 |
| *ABCG2* |  | GC04M088090 |
| *MIR339* |  | GC07M001022 |
| *IL21* |  | GC04M122612 |
| *CCR9* |  | GC03P045903 |
| *IL1B* |  | GC02M112829 |
| *TXN* |  | GC09M110243 |
| *RAD50* |  | GC05P132556 |
| *PEG10* |  | GC07P094656 |
| *CCL19* |  | GC09M034692 |
| *MTR* |  | GC01P236795 |
| *MIR483* |  | GC11M002188 |
| *SET* |  | GC09P128684 |
| *CADM1* |  | GC11M115169 |
| *IL3RA* |  | GC0XP001336 |
| *CNTN2* |  | GC01P205043 |
| *THPO* |  | GC03M184371 |
| *EPC1* |  | GC10M032268 |
| *LCP1* |  | GC13M046132 |
| *AUTS2* |  | GC07P069598 |
| *MIR148A* |  | GC07M025993 |
| *CD163* |  | GC12M007471 |
| *CD99* |  | GC0XP002691 |
| *CTRL* |  | GC16M067927 |
| *CD1D* |  | GC01P158178 |
| *TBRG1* |  | GC11P124622 |
| *GADD45A* |  | GC01P067685 |
| *CD247* |  | GC01M167399 |
| *MFHAS1* |  | GC08M008783 |
| *CD84* |  | GC01M160541 |
| *XRCC5* |  | GC02P216107 |
| *LINC01013* |  | GC06P132131 |
| *JUND* |  | GC19M018279 |
| *ACKR2* |  | GC03P042804 |
| *MIR182* |  | GC07M129770 |
| *CYP2E1* |  | GC10P133520 |
| *STAT4* |  | GC02M191029 |
| *RARA* |  | GC17P040309 |
| *LY6E* |  | GC08P143017 |
| *KLRK1* |  | GC12M013865 |
| *STK11* |  | GC19P001177 |
| *MIR30E* |  | GC01P040754 |
| *MIR486-1* |  | GC08M041660 |
| *IL1A* |  | GC02M112773 |
| *WT1* |  | GC11M032365 |
| *LIG1* |  | GC19M048115 |
| *FHIT* |  | GC03M059747 |
| *BIK* |  | GC22P043110 |
| *FANCD2* |  | GC03P010026 |
| *TGFBR2* |  | GC03P030623 |
| *DES* |  | GC02P219418 |
| *HLA-DRA* |  | GC06P032439 |
| *MIR373* |  | GC19P054634 |
| *MIRLET7E* |  | GC19P051718 |
| *MIR193A* |  | GC17P031559 |
| *MIR146A* |  | GC05P160485 |
| *PRKDC* |  | GC08M047773 |
| *MIR455* |  | GC09P114209 |
| *MIR144* |  | GC17M029965 |
| *TSPYL2* |  | GC0XP053082 |
| *HP* |  | GC16P072089 |
| *RAD51* |  | GC15P040694 |
| *MVP* |  | GC16P030094 |
| *PIP4K2A* |  | GC10M022484 |
| *MIR200C* |  | GC12P008229 |
| *IL18R1* |  | GC02P102311 |
| *MIR30C1* |  | GC01P040757 |
| *MIR423* |  | GC17P030117 |
| *MIR301A* |  | GC17M059151 |
| *MIR330* |  | GC19M045663 |
| *RANBP2* |  | GC02P108719 |
| *TNFRSF4* |  | GC01M001211 |
| *HNRNPH1* |  | GC05M179614 |
| *CD1A* |  | GC01P158255 |
| *CCL21* |  | GC09M034709 |
| *MIR361* |  | GC0XM085903 |
| *CTAGE9* |  | GC06M131708 |
| *TBX21* |  | GC17P047733 |
| *CASP2* |  | GC07P144979 |
| *CNOT3* |  | GC19P055360 |
| *DHFR* |  | GC05M080626 |
| *VCAM1* |  | GC01P100719 |
| *SPP1* |  | GC04P087975 |
| *MIR590* |  | GC07P074191 |
| *RPA1* |  | GC17P001829 |
| *CEP85L* |  | GC06M118460 |
| *CCNE1* |  | GC19P029811 |
| *LUNAR1* |  | GC15P099014 |
| *TAOK3* |  | GC12M118149 |
| *RBM26* |  | GC13M079311 |
| *TIMP1* |  | GC0XP047583 |
| *MIR382* |  | GC14P104799 |
| *HLA-G* |  | GC06P047256 |
| *SLAMF6* |  | GC01M160454 |
| *IDH1* |  | GC02M208236 |
| *TOX* |  | GC08M058791 |
| *RGS1* |  | GC01P192544 |
| *ITGB2* |  | GC21M044885 |
| *IL17A* |  | GC06P052186 |
| *CRP* |  | GC01M159716 |
| *SCYL1* |  | GC11P065525 |
| *MIR29A* |  | GC07M130876 |
| *PRAME* |  | GC22M022547 |
| *NAV3* |  | GC12P077326 |
| *KIR3DL1* |  | GC19P055442 |
| *PTPA* |  | GC09P129111 |
| *LEPR* |  | GC01P065421 |
| *AP3B1* |  | GC05M078000 |
| *SALL2* |  | GC14M021521 |
| *TTC7A* |  | GC02P046906 |
| *MIRLET7I* |  | GC12P062606 |
| *MIR324* |  | GC17M007223 |
| *MIR331* |  | GC12P095308 |
| *WM2* |  | GC04U901020 |
| *MUTYH* |  | GC01M045329 |
| *FGFR1OP2* |  | GC12P026939 |
| *PALB2* |  | GC16M023603 |
| *CD1C* |  | GC01P158289 |
| *NTHL1* |  | GC16M002192 |
| *CXCL11* |  | GC04M076033 |
| *SST* |  | GC03M187668 |
| *ID4* |  | GC06P019837 |
| *DLEU2* |  | GC13M049982 |
| *MAG* |  | GC19P035292 |
| *DDX6* |  | GC11M118748 |
| *IFNGR2* |  | GC21P033402 |
| *NOD2* |  | GC16P050693 |
| *POT1* |  | GC07M124822 |
| *MIRLET7A1* |  | GC09P094175 |
| *PDGFRB* |  | GC05M150113 |
| *SRC* |  | GC20P037344 |
| *CSF1* |  | GC01P109911 |
| *CCNB1* |  | GC05P069167 |
| *SERPINC1* |  | GC01M174153 |
| *HFE* |  | GC06P026087 |
| *ABCC4* |  | GC13M095019 |
| *TNIP1* |  | GC05M151029 |
| *TSC2* |  | GC16P002436 |
| *CEBPB* |  | GC20P050190 |
| *IL18* |  | GC11M112143 |
| *FOXO1* |  | GC13M040555 |
| *CDA* |  | GC01P020588 |
| *SMC1A* |  | GC0XM053374 |
| *ALPP* |  | GC02P232378 |
| *MIR10A* |  | GC17M048579 |
| *ROR1-AS1* |  | GC01M064094 |
| *HLA-DPB1* |  | GC06P047346 |
| *XPA* |  | GC09M097635 |
| *CD9* |  | GC12P008124 |
| *CCL11* |  | GC17P034285 |
| *TOLLIP* |  | GC11M001274 |
| *PRDM16* |  | GC01P003068 |
| *NHP2* |  | GC05M178149 |
| *PTPN3* |  | GC09M109375 |
| *RAC1* |  | GC07P006380 |
| *TNFSF13* |  | GC17P007558 |
| *LPP* |  | GC03P188153 |
| *LPL* |  | GC08P019901 |
| *GGH* |  | GC08M063015 |
| *ARID5B* |  | GC10P061901 |
| *GRB2* |  | GC17M075318 |
| *TERF2* |  | GC16M069355 |
| *CCL5* |  | GC17M035871 |
| *DGKA* |  | GC12P055927 |
| *HIF1A* |  | GC14P061695 |
| *RAD17* |  | GC05P069369 |
| *ERBB2* |  | GC17P039687 |
| *TINF2* |  | GC14M024234 |
| *NOP10* |  | GC15M034341 |
| *GNG11* |  | GC07P093921 |
| *TNFSF12* |  | GC17P008027 |
| *TCN1* |  | GC11M061283 |
| *SNHG5* |  | GC06M085650 |
| *TP53BP1* |  | GC15M043403 |
| *IL10RB* |  | GC21P033266 |
| *DNM3* |  | GC01P171810 |
| *GTSF1* |  | GC12M054455 |
| *TUG1* |  | GC22P030969 |
| *LRBA* |  | GC04M150264 |
| *KLF2* |  | GC19P023268 |
| *CD3G* |  | GC11P118344 |
| *HULC* |  | GC06P008438 |
| *MEF2C-AS2* |  | GC05P088677 |
| *RAB27A* |  | GC15M055202 |
| *SMARCA4* |  | GC19P010932 |
| *GATA2* |  | GC03M128479 |
| *PGM3* |  | GC06M083161 |
| *NSUN2* |  | GC05M006599 |
| *PRDM2* |  | GC01P013702 |
| *NOTCH3* |  | GC19M015159 |
| *PIK3CG* |  | GC07P106865 |
| *CD58* |  | GC01M116514 |
| *MIR181A2* |  | GC09P124692 |
| *FLI1* |  | GC11P128686 |
| *HCK* |  | GC20P032052 |
| *PTPN2* |  | GC18M017325 |
| *CSF3R* |  | GC01M036466 |
| *MTHFD1* |  | GC14P064388 |
| *PDLIM2* |  | GC08P022578 |
| *MMP9* |  | GC20P046008 |
| *AIRE* |  | GC21P044285 |
| *RPS15* |  | GC19P001438 |
| *AFF3* |  | GC02M099545 |
| *APOE* |  | GC19P044906 |
| *HES1* |  | GC03P194136 |
| *TCL4* |  | GC02U990083 |
| *CD244* |  | GC01M160830 |
| *FHL2* |  | GC02M105343 |
| *APTX* |  | GC09M032886 |
| *CD48* |  | GC01M160648 |
| *KLRD1* |  | GC12P010226 |
| *TRPV2* |  | GC17P016415 |
| *ANKRD26* |  | GC10M026938 |
| *CD1B* |  | GC01M158297 |
| *CELIAC2* |  | GC05U900007 |
| *CELIAC10* |  | GC03U901211 |
| *CELIAC11* |  | GC03U901236 |
| *CELIAC12* |  | GC06U901611 |
| *CELIAC13* |  | GC12U901080 |
| *CELIAC5* |  | GC15U900548 |
| *CELIAC6* |  | GC04U900984 |
| *CELIAC7* |  | GC01U902349 |
| *CELIAC8* |  | GC02U901656 |
| *CELIAC9* |  | GC03U901197 |
| *PLEK* |  | GC02P068365 |
| *NPAT* |  | GC11M108157 |
| *LMO1* |  | GC11M008224 |
| *MIR22* |  | GC17M001713 |
| *RHOJ* |  | GC14P063204 |
| *MIR23A* |  | GC19M014011 |
| *NUP98* |  | GC11M003671 |
| *DNASE1L3* |  | GC03M058192 |
| *MPL* |  | GC01P043337 |
| *MICB* |  | GC06P047300 |
| *GATA1* |  | GC0XP048786 |
| *IL21R* |  | GC16P027413 |
| *LINC01554* |  | GC05P095838 |
| *SYP* |  | GC0XM049187 |
| *PHYH* |  | GC10M013277 |
| *TOPBP1* |  | GC03M133600 |
| *CRKL* |  | GC22P020917 |
| *ITGA5* |  | GC12M054396 |
| *VPREB1* |  | GC22P022244 |
| *MAPK3* |  | GC16M030117 |
| *NHEJ1* |  | GC02M219075 |
| *C19orf48* |  | GC19M050797 |
| *RIPK3* |  | GC14M024336 |
| *SDHA* |  | GC05P000208 |
| *SUFU* |  | GC10P102503 |
| *PTPN1* |  | GC20P050510 |
| *PTPRK* |  | GC06M127949 |
| *MIRLET7B* |  | GC22P046119 |
| *TG* |  | GC08P132866 |
| *DOCK8* |  | GC09P000214 |
| *RTEL1* |  | GC20P063658 |
| *CBFB* |  | GC16P067063 |
| *FYN* |  | GC06M111660 |
| *MIR99A* |  | GC21P016539 |
| *IKBKB* |  | GC08P042271 |
| *FRAT2* |  | GC10M097332 |
| *C1S* |  | GC12P008238 |
| *BRD4* |  | GC19M015236 |
| *P2RX7* |  | GC12P122829 |
| *FAF1* |  | GC01M050439 |
| *NALT1* |  | GC09P136547 |
| *EPOR* |  | GC19M011377 |
| *MIR128-2* |  | GC03P035750 |
| *CD164* |  | GC06M109366 |
| *GPT* |  | GC08P144502 |
| *MIR128-1* |  | GC02P135665 |
| *H4-16* |  | GC12M014768 |
| *MDM4* |  | GC01P204516 |
| *LY9* |  | GC01P160796 |
| *MDC1* |  | GC06M030896 |
| *IDH2* |  | GC15M090083 |
| *MAF* |  | GC16M079204 |
| *IGFBP2* |  | GC02P216632 |
| *PML* |  | GC15P073994 |
| *ALPL* |  | GC01P021508 |
| *MTCP1* |  | GC0XM155062 |
| *KIF11* |  | GC10P092593 |
| *CD37* |  | GC19P049335 |
| *IRAK1* |  | GC0XM154010 |
| *MIR106B* |  | GC07M100284 |
| *TERF1* |  | GC08P073003 |
| *MSC* |  | GC08M071836 |
| *ERCC2* |  | GC19M045349 |
| *HLA-DQA2* |  | GC06P032741 |
| *RMI2* |  | GC16P011250 |
| *IGHE* |  | GC14M109515 |
| *RAB2A* |  | GC08P060516 |
| *ACKR4* |  | GC03P132597 |
| *TMEM244* |  | GC06M129831 |
| *MIR328* |  | GC16M067203 |
| *MIR95* |  | GC04M008007 |
| *SACS-AS1* |  | GC13P023418 |
| *CSMD2-AS1* |  | GC01P033868 |
| *MME-AS1* |  | GC03M155158 |
| *PANDAR* |  | GC06M036673 |
| *B3GAT1-DT* |  | GC11P134413 |
| *ALPG* |  | GC02P232407 |
| *VSIG4* |  | GC0XM066021 |
| *HOXA9* |  | GC07M027162 |
| *IRF8* |  | GC16P085898 |
| *MIR27B* |  | GC09P095097 |
| *TKT* |  | GC03M053224 |
| *IRF1* |  | GC05M132481 |
| *SPOCK3* |  | GC04M166733 |
| *CALCA* |  | GC11M014945 |
| *MAPK14* |  | GC06P047451 |
| *MICA* |  | GC06P031399 |
| *BAG1* |  | GC09M033245 |
| *MLLT3* |  | GC09M020334 |
| *AP2B1* |  | GC17P035578 |
| *GAST* |  | GC17P041712 |
| *B3GAT1* |  | GC11M134378 |
| *ABCC5* |  | GC03M183919 |
| *CEACAM6* |  | GC19P041750 |
| *MIR335* |  | GC07P130496 |
| *HLA-DPA1* |  | GC06M033064 |
| *IRF5* |  | GC07P128937 |
| *CLEC16A* |  | GC16P010944 |
| *MAGEA3* |  | GC0XP152698 |
| *SHH* |  | GC07M155799 |
| *GFI1B* |  | GC09P132945 |
| *CCNC* |  | GC06M099542 |
| *LYL1* |  | GC19M013097 |
| *PROM1* |  | GC04M015965 |
| *ACTA2* |  | GC10M088935 |
| *MIR196B* |  | GC07M027260 |
| *MEIS1* |  | GC02P066433 |
| *GLS* |  | GC02P190880 |
| *MIR451A* |  | GC17M028861 |
| *UCHL1* |  | GC04P041256 |
| *CDC42* |  | GC01P022057 |
| *PCSK1* |  | GC05M096391 |
| *MT-CO1* |  | GCMTP005906 |
| *MT-CYB* |  | GCMTP014749 |
| *PGLS* |  | GC19P023306 |
| *XRCC6* |  | GC22P041622 |
| *MIR199B* |  | GC09M128244 |
| *TNFSF4* |  | GC01M173183 |
| *S100B* |  | GC21M047431 |
| *IL1RN* |  | GC02P115307 |
| *IFNB1* |  | GC09M021077 |
| *KLRC1* |  | GC12M013870 |
| *ABCC3* |  | GC17P050634 |
| *TPO* |  | GC02P001374 |
| *NFKBIE* |  | GC06M044258 |
| *HOXD4* |  | GC02P176166 |
| *CREB1* |  | GC02P207529 |
| *PSMB8* |  | GC06M032840 |
| *ADARB1* |  | GC21P045073 |
| *FOLR1* |  | GC11P072190 |
| *SMAD4* |  | GC18P051028 |
| *NT5C* |  | GC17M075130 |
| *ARL11* |  | GC13P049628 |
| *G6PD* |  | GC0XM154531 |
| *PARD3* |  | GC10M034110 |
| *CALR* |  | GC19P012938 |
| *C4A* |  | GC06P047332 |
| *CDKN2B-AS1* |  | GC09P021994 |
| *CNTRL* |  | GC09P121074 |
| *MYOG* |  | GC01M203083 |
| *H4C1* |  | GC06P026041 |
| *H4C11* |  | GC06P028800 |
| *H4C12* |  | GC06M028370 |
| *H4C13* |  | GC06M028372 |
| *H4C14* |  | GC01P149832 |
| *ARF1* |  | GC01P228082 |
| *RPA2* |  | GC01M027902 |
| *MLKL* |  | GC16M074672 |
| *CLSPN* |  | GC01M035720 |
| *ANKRD49* |  | GC11P094493 |
| *IGHG1* |  | GC14M105736 |
| *MIR107* |  | GC10M089600 |
| *IGHV3-21* |  | GC14M109582 |
| *PTCRA* |  | GC06P042915 |
| *FCGR3B* |  | GC01M161623 |
| *ROS1* |  | GC06M117287 |
| *CD83* |  | GC06P014117 |
| *F13A1* |  | GC06M006144 |
| *PIBF1* |  | GC13P072782 |
| *SUZ12* |  | GC17P031937 |
| *KIR2DL3* |  | GC19P055469 |
| *TNFRSF9* |  | GC01M007915 |
| *FGF2* |  | GC04P122826 |
| *SATB1* |  | GC03M018364 |
| *CEP43* |  | GC06P167001 |
| *ERVW-1* |  | GC07M092468 |
| *FST* |  | GC05P053480 |
| *MATK* |  | GC19M003777 |
| *ALPI* |  | GC02P232456 |
| *NUP107* |  | GC12P068686 |
| *TIMM8A* |  | GC0XM101345 |
| *ARFGAP1* |  | GC20P063272 |
| *TRIP11* |  | GC14M091965 |
| *SLC30A5* |  | GC05P069093 |
| *ARFGAP3* |  | GC22M042796 |
| *MCPH1* |  | GC08P006406 |
| *CLPS* |  | GC06M042222 |
| *NUP133* |  | GC01M229441 |
| *HBZ* |  | GC16P000142 |
| *SLC30A7* |  | GC01P100824 |
| *NUP85* |  | GC17P075205 |
| *NUP160* |  | GC11M061140 |
| *TRIM29* |  | GC11M120111 |
| *LDHAL6B* |  | GC15P059206 |
| *RAB3IL1* |  | GC11M061897 |
| *ARFGAP2* |  | GC11M061114 |
| *AHCTF1* |  | GC01M246840 |
| *PAM16* |  | GC16M004332 |
| *MAS1L* |  | GC06M029504 |
| *VILL* |  | GC03P037989 |
| *NUP43* |  | GC06M149724 |
| *GET1* |  | GC21P039377 |
| *MIR130A* |  | GC11P057641 |
| *MT-TF* |  | GCMTP000580 |
| *MT-TH* |  | GCMTP012140 |
| *CLLS1* |  | GC11U901284 |
| *CLLS2* |  | GC13U901046 |
| *CLLS3* |  | GC09U901236 |
| *CLLS4* |  | GC06U901626 |
| *CLLS5* |  | GC11U901259 |
| *HDPA* |  | GC0XU990304 |
| *TH2LCRR* |  | GC05M132631 |
| *PTPRD* |  | GC09M008307 |
| *NSD2* |  | GC04P001872 |
| *SERPINA1* |  | GC14M094376 |
| *TLR7* |  | GC0XP012867 |
| *MIR503HG* |  | GC0XM134631 |
| *ESR1* |  | GC06P151656 |
| *IL6ST* |  | GC05M055935 |
| *FOLR2* |  | GC11P072216 |
| *NUDC* |  | GC01P026932 |
| *KLK10* |  | GC19M051012 |
| *HNRNPH3* |  | GC10P068331 |
| *ASPG* |  | GC14P104085 |
| *CDK6-AS1* |  | GC07P092837 |
| *CHD7* |  | GC08P060678 |
| *PARN* |  | GC16M014435 |
| *CTC1* |  | GC17M008875 |
| *PMS1* |  | GC02P189784 |
| *HDAC1* |  | GC01P032292 |
| *CBLL1* |  | GC07P107743 |
| *IGF2* |  | GC11M002130 |
| *CCL2* |  | GC17P034255 |
| *FLT1* |  | GC13M028300 |
| *CARD16* |  | GC11M105041 |
| *KRT20* |  | GC17M040875 |
| *SOS1* |  | GC02M038981 |
| *KLK3* |  | GC19P050854 |
| *TK1* |  | GC17M078175 |
| *ACKR3* |  | GC02P236537 |
| *EBF1* |  | GC05M158695 |
| *KLHL6* |  | GC03M183487 |
| *RNU2-1* |  | GC17M043233 |
| *PPL* |  | GC16M004872 |
| *EPO* |  | GC07P100720 |
| *ACP5* |  | GC19M011574 |
| *SOCS3* |  | GC17M078356 |
| *IL1R1* |  | GC02P102136 |
| *RTN4R* |  | GC22M020234 |
| *PREB* |  | GC02M027130 |
| *DCAF8* |  | GC01M160215 |
| *XIST* |  | GC0XM073820 |
| *MIR708* |  | GC11M079402 |
| *ENSG00000228778* | | GC10P099527 |
| *BMPR1A* |  | GC10P086756 |
| *IFI27* |  | GC14P094104 |
| *PTPN22* |  | GC01M113813 |
| *FRK* |  | GC06M115931 |
| *TJP1* |  | GC15M029699 |
| *LRP2* |  | GC02M169127 |
| *AURKA* |  | GC20M056370 |
| *MYH11* |  | GC16M015704 |
| *MIR26B* |  | GC02P218402 |
| *CYLD* |  | GC16P050742 |
| *LEP* |  | GC07P128241 |
| *FGF1* |  | GC05M142555 |
| *TGFB1* |  | GC19M041301 |
| *ERCC6* |  | GC10M049454 |
| *UHRF1* |  | GC19P004910 |
| *RBL1* |  | GC20M036996 |
| *C1orf56* |  | GC01P151047 |
| *CTTN* |  | GC11P070398 |
| *CAV1* |  | GC07P116524 |
| *PTPN6* |  | GC12P008223 |
| *FARSA* |  | GC19M012922 |
| *LMO4* |  | GC01P087329 |
| *CCL4* |  | GC17P036103 |
| *MIR19A* |  | GC13P091433 |
| *RC3H1* |  | GC01M173931 |
| *PTGS2* |  | GC01M186640 |
| *PRDM11* |  | GC11P045072 |
| *GHRL* |  | GC03M010285 |
| *ENO1* |  | GC01M008861 |
| *XPC* |  | GC03M015787 |
| *TLR5* |  | GC01M223109 |
| *BIRC7* |  | GC20P063235 |
| *CXCR1* |  | GC02M218162 |
| *MBL2* |  | GC10M052760 |
| *MPIG6B* |  | GC06P047944 |
| *IL18RAP* |  | GC02P102418 |
| *TLR6* |  | GC04M038828 |
| *TNFRSF18* |  | GC01M001203 |
| *FDCSP* |  | GC04P070226 |
| *MIR92A2* |  | GC0XM134206 |
| *ATF2* |  | GC02M175072 |
| *CD207* |  | GC02M070830 |
| *MAGEA1* |  | GC0XP153179 |
| *LIF* |  | GC22M030240 |
| *LCP2* |  | GC05M170246 |
| *DGUOK* |  | GC02P073926 |
| *HLA-E* |  | GC06P047281 |
| *CT45A1* |  | GC0XP135713 |
| *DLEU1* |  | GC13P050084 |
| *BCOR* |  | GC0XM040049 |
| *CYP21A2* |  | GC06P047333 |
| *EGR1* |  | GC05P138465 |
| *AMOTL1* |  | GC11P094686 |
| *MIR184* |  | GC15P079209 |
| *CASP1* |  | GC11M105025 |
| *CHN2* |  | GC07P029186 |
| *PNLIP* |  | GC10P116545 |
| *EDIL3* |  | GC05M083940 |
| *MICU1* |  | GC10M072367 |
| *MIR542* |  | GC0XM134630 |
| *MDK* |  | GC11P046402 |
| *ALOX5* |  | GC10P045374 |
| *RPS19* |  | GC19P041859 |
| *PPP1R9A* |  | GC07P094907 |
| *CD72* |  | GC09M035610 |
| *BLK* |  | GC08P011486 |
| *LTF* |  | GC03M046435 |
| *ERCC1* |  | GC19M045409 |
| *PPARG* |  | GC03P012287 |
| *FEN1* |  | GC11P061811 |
| *MIR192* |  | GC11M064891 |
| *MIR494* |  | GC14P104814 |
| *SLC2A1* |  | GC01M042925 |
| *CCR8* |  | GC03P039330 |
| *RPL5* |  | GC01P092832 |
| *FANCF* |  | GC11M022600 |
| *ENTPD1* |  | GC10P095711 |
| *INS* |  | GC11M002159 |
| *CHGA* |  | GC14P092923 |
| *FGF4* |  | GC11M069762 |
| *IGK* |  | GC02P088857 |
| *OSM* |  | GC22M030262 |
| *TGM2* |  | GC20M038127 |
| *MYOD1* |  | GC11P017741 |
| *PUS10* |  | GC02M060940 |
| *SMARCB1* |  | GC22P023786 |
| *GZMM* |  | GC19P000544 |
| *PDE4A* |  | GC19P010416 |
| *RPS3A* |  | GC04P151099 |
| *KRT7* |  | GC12P052232 |
| *MECOM* |  | GC03M169083 |
| *KPNA2* |  | GC17P068035 |
| *MUS81* |  | GC11P065883 |
| *FANCB* |  | GC0XM014690 |
| *LUC7L2* |  | GC07P139344 |
| *PAX3* |  | GC02M222199 |
| *TAC1* |  | GC07P097731 |
| *IL12B* |  | GC05M159314 |
| *AHI1* |  | GC06M135283 |
| *TLR10* |  | GC04M038773 |
| *FXYD5* |  | GC19P035154 |
| *LSP1* |  | GC11P001852 |
| *FIP1L1* |  | GC04P053386 |
| *HOXA@* |  | GC07U990048 |
| *C11orf65* |  | GC11M108308 |
| *NF1* |  | GC17P031094 |
| *NCK1* |  | GC03P136862 |
| *CHST14* |  | GC15P040470 |
| *MMEL1* |  | GC01M002590 |
| *KDM6A* |  | GC0XP044873 |
| *TNFSF11* |  | GC13P042562 |
| *MIR125B1* |  | GC11M122100 |
| *PYCARD* |  | GC16M031201 |
| *APOH* |  | GC17M066212 |
| *HOXA10* |  | GC07M027262 |
| *ACTC1* |  | GC15M034788 |
| *TEF* |  | GC22P041367 |
| *TNFRSF25* |  | GC01M006460 |
| *TRPM7* |  | GC15M050552 |
| *IL12RB1* |  | GC19M018058 |
| *CCNE2* |  | GC08M094879 |
| *TLR3* |  | GC04P186059 |
| *GSR* |  | GC08M030678 |
| *SELE* |  | GC01M169722 |
| *HLA-DMA* |  | GC06M032950 |
| *MAP3K14* |  | GC17M045263 |
| *UBE2L3* |  | GC22P021549 |
| *MEF2C* |  | GC05M088718 |
| *CCL20* |  | GC02P227813 |
| *ACE* |  | GC17P063477 |
| *SSTR2* |  | GC17P073165 |
| *TPM3* |  | GC01M154127 |
| *RAC2* |  | GC22M037227 |
| *TRPM6* |  | GC09M074725 |
| *TOR1A* |  | GC09M129812 |
| *STT3B* |  | GC03P031550 |
| *TUSC3* |  | GC08P015417 |
| *RECQL* |  | GC12M021468 |
| *RECQL5* |  | GC17M075626 |
| *SLC41A1* |  | GC01M205789 |
| *RMI1* |  | GC09P083980 |
| *SLC41A2* |  | GC12M104802 |
| *RANBP6* |  | GC09M006002 |
| *NIPAL1* |  | GC04P047917 |
| *KRTCAP2* |  | GC01M155141 |
| *IGLL5* |  | GC22P024570 |
| *OSGIN2* |  | GC08P089901 |
| *TH2-LCR* |  | GC05P132629 |
| *GOT2* |  | GC16M058707 |
| *RHOD* |  | GC11P067057 |
| *ADCY10* |  | GC01M167809 |
| *MIR195* |  | GC17M007018 |
| *SRF* |  | GC06P043171 |
| *INO80* |  | GC15M040979 |
| *ETS1* |  | GC11M128458 |
| *STK4* |  | GC20P044966 |
| *MEN1* |  | GC11M064803 |
| *FCRLA* |  | GC01P161708 |
| *ARPC2* |  | GC02P218217 |
| *H6PD* |  | GC01P009234 |
| *GORASP2* |  | GC02P170928 |
| *BCL5* |  | GC17U990006 |
| *SMARCA2* |  | GC09P001980 |
| *PTH* |  | GC11M013492 |
| *RPS14* |  | GC05M150443 |
| *MIR206* |  | GC06P052144 |
| *ARHGAP29* |  | GC01M094148 |
| *AFF4* |  | GC05M132875 |
| *PDLIM5* |  | GC04P094451 |
| *JCHAIN* |  | GC04M070655 |
| *F2* |  | GC11P046720 |
| *HSPG2* |  | GC01M021822 |
| *BLZF1* |  | GC01P169367 |
| *CCNT1* |  | GC12M048688 |
| *PHF6* |  | GC0XP134373 |
| *ELF1* |  | GC13M040932 |
| *PAWR* |  | GC12M079574 |
| *ARHGAP45* |  | GC19P001065 |
| *CCL8* |  | GC17P034319 |
| *FHL1* |  | GC0XP136146 |
| *IL23R* |  | GC01P067138 |
| *RPS24* |  | GC10P078033 |
| *SERPINB3* |  | GC18M063655 |
| *IL22* |  | GC12M068248 |
| *NSMAF* |  | GC08M058569 |
| *FN1* |  | GC02M215360 |
| *P2RY8* |  | GC0XM001462 |
| *NINL* |  | GC20M025452 |
| *MSH5* |  | GC06P047322 |
| *CTSC* |  | GC11M088211 |
| *SH2B3* |  | GC12P111405 |
| *VPREB3* |  | GC22M023752 |
| *NGF* |  | GC01M115285 |
| *MIR135A1* |  | GC03M052296 |
| *HELLS* |  | GC10P094501 |
| *SSTR3* |  | GC22M037204 |
| *MYO18A* |  | GC17M029968 |
| *IGHV4-34* |  | GC14M109668 |
| *MIR20B* |  | GC0XM134217 |
| *FLT4* |  | GC05M180607 |
| *ENSG00000259084* | | GC14P095663 |
| *ENSG00000258927* | | GC14P095620 |
| *SPIB* |  | GC19P050418 |
| *KRT19* |  | GC17M041523 |
| *KRT15* |  | GC17M041513 |
| *MIR16-2* |  | GC03P160413 |
| *IL11* |  | GC19M055364 |
| *ABCB4* |  | GC07M087401 |
| *IFI16* |  | GC01P158969 |
| *PTK6* |  | GC20M063528 |
| *GLI2* |  | GC02P120735 |
| *TAL2* |  | GC09P105662 |
| *CTSL* |  | GC09P087725 |
| *OLIG2* |  | GC21P033025 |
| *BRD2* |  | GC06P047345 |
| *RBBP7* |  | GC0XM016839 |
| *CENPB* |  | GC20M003783 |
| *CTPS1* |  | GC01P040979 |
| *TRIM24* |  | GC07P138460 |
| *TPR* |  | GC01M186319 |
| *DNA2* |  | GC10M068414 |
| *SSTR4* |  | GC20P023035 |
| *HAS1* |  | GC19M051714 |
| *MCM10* |  | GC10P013161 |
| *ARFRP1* |  | GC20M063698 |
| *SCAPER* |  | GC15M076347 |
| *TCHP* |  | GC12P109900 |
| *FAM189B* |  | GC01M155248 |
| *RIC1* |  | GC09P005667 |
| *DMAC1* |  | GC09M007798 |
| *MIR103A1* |  | GC05M168560 |
| *MIR19B2* |  | GC0XM134207 |
| *CD27-AS1* |  | GC12M006439 |
| *SLC2A1-AS1* |  | GC01P042959 |
| *PSORS5* |  | GC03U990180 |
| *PSORS4* |  | GC01U990227 |
| *PSORS6* |  | GC19U990233 |
| *PSORS9* |  | GC04U900068 |
| *EEC1* |  | GC07U990021 |
| *PSORS10* |  | GC18U900225 |
| *PSORS3* |  | GC04U990060 |
| *PSORS7* |  | GC01U901606 |
| *PSORS8* |  | GC16U990237 |
| *HHV8S* |  | GC03U901853 |
| *IBD25* |  | GC00U932269 |
| *PSORS11* |  | GC05U901084 |
| *LALL* |  | GC09U990081 |
| *UBR2* |  | GC06P047519 |
| *E2F4* |  | GC16P067192 |
| *MIR29B2* |  | GC01M207806 |
| *MIR29C* |  | GC01M207802 |
| *TSPAN7* |  | GC0XP038561 |
| *TNFRSF6B* |  | GC20P063696 |
| *MEF2D* |  | GC01M156463 |
| *ATRX* |  | GC0XM077504 |
| *LALBA* |  | GC12M048567 |
| *ZFP36L2* |  | GC02M043184 |
| *SF3B1* |  | GC02M197389 |
| *HDAC2* |  | GC06M113933 |
| *HMGB1* |  | GC13M030456 |
| *PTPRU* |  | GC01P029236 |
| *UGT1A1* |  | GC02P233760 |
| *PIK3CB* |  | GC03M138652 |
| *IL24* |  | GC01P206897 |
| *POMC* |  | GC02M025160 |
| *GHR* |  | GC05P042429 |
| *BCL2L13* |  | GC22P017628 |
| *SRM* |  | GC01M011054 |
| *MIR502* |  | GC0XP050014 |
| *IFNGR1* |  | GC06M137197 |
| *SFTPD* |  | GC10M079937 |
| *MAML1* |  | GC05P179732 |
| *LDB1* |  | GC10M102106 |
| *LAMA2* |  | GC06P128863 |
| *IGHMBP2* |  | GC11P068903 |
| *EGF* |  | GC04P109912 |
| *MMP2* |  | GC16P055390 |
| *NTRK1* |  | GC01P156786 |
| *IRF7* |  | GC11M000612 |
| *MIR196A2* |  | GC12P054200 |
| *DSP* |  | GC06P007541 |
| *E2F3* |  | GC06P020402 |
| *AKAP17A* |  | GC0XP001591 |
| *BARD1* |  | GC02M214725 |
| *CSN1S1* |  | GC04P069932 |
| *MIR141* |  | GC12P008231 |
| *IBTK* |  | GC06M082169 |
| *ZNRD2* |  | GC11P065813 |
| *BAIAP2* |  | GC17P081035 |
| *PTK7* |  | GC06P043076 |
| *WASF1* |  | GC06M110099 |
| *TRDMT1* |  | GC10M017098 |
| *NCKIPSD* |  | GC03M048667 |
| *H2AZ1* |  | GC04M099949 |
| *NKX2-1* |  | GC14M036516 |
| *HSPH1* |  | GC13M031134 |
| *CCL26* |  | GC07M075769 |
| *CYSLTR1* |  | GC0XM078271 |
| *THEMIS* |  | GC06M127708 |
| *MAP3K7* |  | GC06M090513 |
| *TAP2* |  | GC06M032821 |
| *RNASE3* |  | GC14P020891 |
| *MIR24-1* |  | GC09P095086 |
| *MBP* |  | GC18M076978 |
| *TYR* |  | GC11P089177 |
| *APOBEC3A* |  | GC22P038952 |
| *MAGEA4* |  | GC0XP151912 |
| *PRL* |  | GC06M022230 |
| *PDCD2* |  | GC06M170589 |
| *MC1R* |  | GC16P089912 |
| *PTN* |  | GC07M137227 |
| *SHMT1* |  | GC17M019857 |
| *IL31* |  | GC12M122173 |
| *ACTR2* |  | GC02P065227 |
| *ZFP36L1* |  | GC14M068787 |
| *PREP* |  | GC06M105277 |
| *PYY* |  | GC17M043952 |
| *ADAD1* |  | GC04P122378 |
| *CBLIF* |  | GC11M059829 |
| *TCTA* |  | GC03P049412 |
| *NAT2* |  | GC08P018391 |
| *MIR224* |  | GC0XM151958 |
| *CCK* |  | GC03M042274 |
| *CLDN2* |  | GC0XP106900 |
| *BID* |  | GC22M017734 |
| *EMP1* |  | GC12P013196 |
| *CD209* |  | GC19M007739 |
| *AKT2* |  | GC19M040230 |
| *DDX39B* |  | GC06M031530 |
| *CDK9* |  | GC09P127814 |
| *UBASH3A* |  | GC21P042403 |
| *CORT* |  | GC01P010449 |
| *LOC110806263* | | GC05P001294 |
| *ZC3HC1* |  | GC07M130026 |
| *MIR204* |  | GC09M070809 |
| *SETBP1* |  | GC18P044680 |
| *CARD14* |  | GC17P080170 |
| *VEGFC* |  | GC04M176683 |
| *MYO9B* |  | GC19P023294 |
| *PRSS3* |  | GC09P033750 |
| *CNN1* |  | GC19P011539 |
| *PIWIL1* |  | GC12P130337 |
| *TRIP10* |  | GC19P006737 |
| *MTSS1* |  | GC08M124550 |
| *KLRC2* |  | GC12M013869 |
| *SCT* |  | GC11M000626 |
| *ZNRF3* |  | GC22P028803 |
| *ANKRD55* |  | GC05M056099 |
| *MIR132* |  | GC17M002049 |
| *MIR181B1* |  | GC01M198858 |
| *AFP* |  | GC04P073431 |
| *ALDH1A1* |  | GC09M072900 |
| *RBBP4* |  | GC01P032651 |
| *GUSB* |  | GC07M065960 |
| *SOX2* |  | GC03P181711 |
| *CCL27* |  | GC09M034662 |
| *CYP2D6* |  | GC22M042126 |
| *C3* |  | GC19M006677 |
| *SMPD1* |  | GC11P006390 |
| *HNRNPA1* |  | GC12P054280 |
| *IGF2R* |  | GC06P159969 |
| *ELANE* |  | GC19P000854 |
| *PDGFB* |  | GC22M045657 |
| *RIPK2* |  | GC08P089758 |
| *LOC111188153* | | GC05P150092 |
| *KL* |  | GC13P033016 |
| *TSLP* |  | GC05P111070 |
| *MCM7* |  | GC07M100092 |
| *DDX1* |  | GC02P015591 |
| *PRKCQ* |  | GC10M006393 |
| *PARP14* |  | GC03P122680 |
| *ZNF384* |  | GC12M006668 |
| *FGFR2* |  | GC10M121478 |
| *SLC7A11* |  | GC04M138164 |
| *MAML2* |  | GC11M095976 |
| *TLR8* |  | GC0XP012924 |
| *GAD2* |  | GC10P026216 |
| *DHCR7* |  | GC11M071428 |
| *GRIK1* |  | GC21M029536 |
| *DDB2* |  | GC11P047237 |
| *PSTPIP1* |  | GC15P076993 |
| *FUT2* |  | GC19P048695 |
| *MMP12* |  | GC11M102862 |
| *CDC45* |  | GC22P019479 |
| *SNRPB* |  | GC20M002461 |
| *OCLN* |  | GC05P069492 |
| *PTPRN* |  | GC02M219289 |
| *FABP2* |  | GC04M119317 |
| *ATG16L1* |  | GC02P233215 |
| *COL10A1* |  | GC06M116118 |
| *SBDS* |  | GC07M066987 |
| *LCT* |  | GC02M135787 |
| *LAP3* |  | GC04P017578 |
| *TAGLN* |  | GC11P117199 |
| *RAD51C* |  | GC17P058692 |
| *WASF2* |  | GC01M027404 |
| *ACTR3* |  | GC02P113889 |
| *SLC30A10* |  | GC01M219685 |
| *SLC30A8* |  | GC08P116950 |
| *TCOF1* |  | GC05P150358 |
| *NAGS* |  | GC17P044004 |
| *GCG* |  | GC02M162142 |
| *ERF* |  | GC19M042247 |
| *DNMT3L* |  | GC21M044246 |
| *SNX9* |  | GC06P157685 |
| *NISCH* |  | GC03P052455 |
| *PDE6H* |  | GC12P014982 |
| *WASL* |  | GC07M123681 |
| *CRMP1* |  | GC04M005750 |
| *LDHD* |  | GC16M075111 |
| *RAD51D* |  | GC17M035092 |
| *RFWD3* |  | GC16M074621 |
| *WASF3* |  | GC13P026557 |
| *CHST10* |  | GC02M100391 |
| *DPYSL3* |  | GC05M147390 |
| *TRAK2* |  | GC02M201377 |
| *TGM6* |  | GC20P002380 |
| *ACCS* |  | GC11P044045 |
| *ANKRD11* |  | GC16M089267 |
| *FMN1* |  | GC15M032765 |
| *TOR1B* |  | GC09P129803 |
| *RDH8* |  | GC19P010014 |
| *FXYD3* |  | GC19P035115 |
| *CELA3B* |  | GC01P021976 |
| *PIWIL4* |  | GC11P094543 |
| *PHLDB1* |  | GC11P118606 |
| *TAGAP* |  | GC06M159034 |
| *AZIN2* |  | GC01P033081 |
| *EPRS1* |  | GC01M219969 |
| *AGO1* |  | GC01P035869 |
| *CELA1* |  | GC12M051328 |
| *PPP1R1C* |  | GC02P181954 |
| *PLLP* |  | GC16M057290 |
| *JMY* |  | GC05P079236 |
| *AGO4* |  | GC01P035807 |
| *SCHIP1* |  | GC03P159273 |
| *NUDT10* |  | GC0XP051332 |
| *RAI2* |  | GC0XM017818 |
| *KIAA1109* |  | GC04P122152 |
| *POP5* |  | GC12M120578 |
| *WDR20* |  | GC14P104636 |
| *CABP1* |  | GC12P120676 |
| *ZNF460* |  | GC19P057279 |
| *WHAMM* |  | GC15P082808 |
| *FAM160B2* |  | GC08P022089 |
| *SCRT1* |  | GC08M144330 |
| *BEND4* |  | GC04M042112 |
| *CNST* |  | GC01P246566 |
| *ZNF304* |  | GC19P057351 |
| *RHNO1* |  | GC12P002876 |
| *TMEM59L* |  | GC19P018607 |
| *NPB* |  | GC17P081900 |
| *FAM221B* |  | GC09M035816 |
| *CCDC26* |  | GC08M128636 |
| *WASHC1* |  | GC09M000016 |
| *WASH3P* |  | GC15P101960 |
| *MIR154* |  | GC14P104778 |
| *H3-2* |  | GC01M143894 |
| *WASH6P* |  | GC0XP156020 |
| *MIR605* |  | GC10P051299 |
| *LINC01193* |  | GC15P021072 |
| *WASF4P* |  | GC0XP047804 |
| *WASF5P* |  | GC06M031287 |
| *LFS3* |  | GC00U936829 |
| *EFNA5* |  | GC05M107376 |
| *MIR100* |  | GC11M122152 |
| *ATF4* |  | GC22P039525 |
| *CHKA* |  | GC11M068052 |
| *CD36* |  | GC07P080369 |
| *LOC100288590* | | GC21M038204 |
| *LOC100421663* | | GC20P019809 |
| *LOC100421630* | | GC04M176631 |
| *HDAC6* |  | GC0XP048801 |
| *NGFR* |  | GC17P049495 |
| *DGCR6* |  | GC22P018906 |
| *PSORS1C1* |  | GC06P031114 |
| *MAD1L1* |  | GC07M001815 |
| *EEF1A1* |  | GC06M073515 |
| *CDX2* |  | GC13M027962 |
| *ATIC* |  | GC02P215311 |
| *MIR197* |  | GC01P109549 |
| *UNG* |  | GC12P109097 |
| *PUF60* |  | GC08M143816 |
| *RARS1* |  | GC05P168487 |
| *MIR10B* |  | GC02P176150 |
| *NT5E* |  | GC06P085449 |
| *POU5F1* |  | GC06M031184 |
| *SPATA18* |  | GC04P052051 |
| *FBL* |  | GC19M039834 |
| *ADIPOQ* |  | GC03P186842 |
| *NOS2* |  | GC17M027756 |
| *WNT10A* |  | GC02P218880 |
| *TSG101* |  | GC11M018468 |
| *CXCL1* |  | GC04P073869 |
| *TEK* |  | GC09P027109 |
| *LMNA* |  | GC01P156082 |
| *CYP2B6* |  | GC19P040991 |
| *SLCO1B1* |  | GC12P021132 |
| *EVPL* |  | GC17M076004 |
| *S100A9* |  | GC01P153357 |
| *FH* |  | GC01M241499 |
| *LOC100507346* | | GC09P095463 |
| *HLA-DRB9* |  | GC06M032672 |
| *GLI1* |  | GC12P057460 |
| *KRT1* |  | GC12M052674 |
| *LGALS3* |  | GC14P055124 |
| *H19* |  | GC11M001995 |
| *SLPI* |  | GC20M045252 |
| *PTP4A1* |  | GC06P063521 |
| *GZMA* |  | GC05P055102 |
| *FUT7* |  | GC09M137030 |
| *SNCA* |  | GC04M089724 |
| *ADAM17* |  | GC02M009488 |
| *PLAU* |  | GC10P073909 |
| *FANCA* |  | GC16M089748 |
| *SSB* |  | GC02P169791 |
| *KRT10* |  | GC17M040818 |
| *DROSHA* |  | GC05M031401 |
| *DSG3* |  | GC18P031447 |
| *CLLU1* |  | GC12P092422 |
| *UBE3A* |  | GC15M025333 |
| *NCR3LG1* |  | GC11P017351 |
| *CBLC* |  | GC19P044777 |
| *BMP6* |  | GC06P007726 |
| *ID2* |  | GC02P008772 |
| *GNAS* |  | GC20P058839 |
| *PLA2G4A* |  | GC01P186798 |
| *TCF12* |  | GC15P056918 |
| *BGLAP* |  | GC01P156242 |
| *CD2-LCR* |  | GC01P116769 |
| *TGFA* |  | GC02M070447 |
| *FOXO3* |  | GC06P108559 |
| *CA2* |  | GC08P085463 |
| *SPTAN1* |  | GC09P128552 |
| *CSF2RA* |  | GC0XP001270 |
| *PKN2* |  | GC01P088684 |
| *KRT16* |  | GC17M041609 |
| *PDE3B* |  | GC11P014643 |
| *ORC4* |  | GC02M147930 |
| *CLEC12A* |  | GC12P009951 |
| *CCHCR1* |  | GC06M031145 |
| *ACTRT3* |  | GC03M169766 |
| *PSORS1C2* |  | GC06M031137 |
| *PSORS1C3* |  | GC06M031179 |
| *TRIM21* |  | GC11M004384 |
| *FCGRT* |  | GC19P049506 |
| *SLC11A1* |  | GC02P218382 |
| *CENPF* |  | GC01P214603 |
| *CCL24* |  | GC07M075811 |
| *MEG3* |  | GC14P104771 |
| *IL17F* |  | GC06M052209 |
| *SRSF1* |  | GC17M058000 |
| *IL19* |  | GC01P206770 |
| *HGF* |  | GC07M081699 |
| *POU2F1* |  | GC01P167190 |
| *COMMD3-BMI1* | | GC10P022316 |
| *NUDT15* |  | GC13P048037 |
| *ADRB2* |  | GC05P148825 |
| *MECP2* |  | GC0XM154021 |
| *ATF7* |  | GC12M053522 |
| *MLANA* |  | GC09P005846 |
| *DDX58* |  | GC09M032455 |
| *TFDP1* |  | GC13P113584 |
| *IGES* |  | GC05U990033 |
| *TIMP2* |  | GC17M078852 |
| *MAP2K7* |  | GC19P007903 |
| *CD3E* |  | GC11P118304 |
| *SLC29A2* |  | GC11M066363 |
| *PDE7A* |  | GC08M065716 |
| *KLK4* |  | GC19M050907 |
| *FCN2* |  | GC09P134864 |
| *XPO5* |  | GC06M043522 |
| *RPL29* |  | GC03M052005 |
| *NSUN5* |  | GC07M073302 |
| *SF3B2* |  | GC11P066050 |
| *RPL38* |  | GC17P074204 |
| *CEP70* |  | GC03M138494 |
| *RO60* |  | GC01P193059 |
| *AKT3* |  | GC01M243488 |
| *CASP14* |  | GC19P015049 |
| *COIL* |  | GC17M056938 |
| *IL17D* |  | GC13P020702 |
| *ALYREF* |  | GC17M081887 |
| *SEZ6L2* |  | GC16M029884 |
| *ZNF804A* |  | GC02P184598 |
| *LITAF* |  | GC16M011547 |
| *FBXO10* |  | GC09M037510 |
| *TSC1* |  | GC09M132891 |
| *AGPAT2* |  | GC09M136673 |
| *TWIST1* |  | GC07M019020 |
| *LIG3* |  | GC17P034980 |
| *TFDP2* |  | GC03M141944 |
| *MTRR* |  | GC05P007851 |
| *H4C15* |  | GC01M149964 |
| *SERPINB9* |  | GC06M002887 |
| *DKK1* |  | GC10P052314 |
| *HSPB2* |  | GC11P111913 |
| *CDR2* |  | GC16M022357 |
| *MIR326* |  | GC11M075335 |
| *VKORC1* |  | GC16M031105 |
| *CSTA* |  | GC03P122325 |
| *FGF7* |  | GC15P049423 |
| *CHD3* |  | GC17P008060 |
| *MIR148B* |  | GC12P054337 |
| *CHRM3* |  | GC01P239386 |
| *DSG1* |  | GC18P031318 |
| *BSG* |  | GC19P000571 |
| *HLA-DRB5* |  | GC06M032683 |
| *RDH11* |  | GC14M067676 |
| *LAMP1* |  | GC13P113297 |
| *CLPTM1L* |  | GC05M001317 |
| *MIR133B* |  | GC06P052148 |
| *MIR122* |  | GC18P058451 |
| *H4C2* |  | GC06M026026 |
| *H4C3* |  | GC06P028681 |
| *H4C8* |  | GC06M027323 |
| *H4C9* |  | GC06P028910 |
| *H4C6* |  | GC06P028909 |
| *H4C4* |  | GC06M027321 |
| *H4C5* |  | GC06P028907 |
| *IFIH1* |  | GC02M162267 |
| *EXO1* |  | GC01P241847 |
| *IGBP1* |  | GC0XP070133 |
| *MIAT* |  | GC22P026646 |
| *MIR378A* |  | GC05P149732 |
| *MIR33A* |  | GC22P041900 |
| *SCARNA2* |  | GC01P109108 |
| *MIR802* |  | GC21P035720 |
| *IRF3* |  | GC19M049659 |
| *KIR2DL1* |  | GC19P055437 |
| *SHC1* |  | GC01M154962 |
| *NEDD4* |  | GC15M055826 |
| *TYMP* |  | GC22M050525 |
| *XKR8* |  | GC01P027971 |
| *IRAG2* |  | GC12P025004 |
| *MAX* |  | GC14M065009 |
| *PIR* |  | GC0XM015402 |
| *HLA-DQB2* |  | GC06M032756 |
| *PARP15* |  | GC03P122577 |
| *POLA1* |  | GC0XP024693 |
| *AIFM1* |  | GC0XM130129 |
| *MORC4* |  | GC0XM106813 |
| *DAXX* |  | GC06M033318 |
| *IL15RA* |  | GC10M005943 |
| *AK2* |  | GC01M033007 |
| *STIM1* |  | GC11P003855 |
| *HTR2A* |  | GC13M046831 |
| *NEFL* |  | GC08M024950 |
| *AQP5* |  | GC12P049961 |
| *ARAF* |  | GC0XP047562 |
| *TGM1* |  | GC14M024249 |
| *NLRP12* |  | GC19M053793 |
| *FOXG1* |  | GC14P028766 |
| *DDX11* |  | GC12P031073 |
| *UBE3B* |  | GC12P109477 |
| *UBR1* |  | GC15M042942 |
| *TACC3* |  | GC04P001723 |
| *KIF1A* |  | GC02M240713 |
| *PDE9A* |  | GC21P042653 |
| *E2F2* |  | GC01M023527 |
| *SMN2* |  | GC05P070049 |
| *TOP3A* |  | GC17M018271 |
| *CUL7* |  | GC06M043037 |
| *RNMT* |  | GC18P013716 |
| *EIF4H* |  | GC07P074174 |
| *SMN1* |  | GC05P070924 |
| *SIL1* |  | GC05M138957 |
| *PSMD12* |  | GC17M067337 |
| *COLEC10* |  | GC08P118952 |
| *E2F5* |  | GC08P085177 |
| *CD101* |  | GC01P117001 |
| *NSUN4* |  | GC01P046341 |
| *CD1E* |  | GC01P158354 |
| *OBSL1* |  | GC02M219550 |
| *WFDC2* |  | GC20P045469 |
| *LCOR* |  | GC10P096832 |
| *TRUB1* |  | GC10P114938 |
| *VAX2* |  | GC02P070900 |
| *LRRC56* |  | GC11P000518 |
| *BLOC1S1* |  | GC12P055718 |
| *DMTN* |  | GC08P022048 |
| *MXD4* |  | GC04M002295 |
| *DUOXA1* |  | GC15M045119 |
| *POU3F1* |  | GC01M038044 |
| *NSUN6* |  | GC10M018520 |
| *IRF2BP2* |  | GC01M234604 |
| *PIF1* |  | GC15M064815 |
| *U2AF1L4* |  | GC19M042409 |
| *NSUN7* |  | GC04P040751 |
| *SHQ1* |  | GC03M072798 |
| *MTERF4* |  | GC02M241072 |
| *SETD4* |  | GC21M036034 |
| *BUD23* |  | GC07P073685 |
| *SPAG11B* |  | GC08M007442 |
| *SPAG11A* |  | GC08P007847 |
| *CRNDE* |  | GC16M054845 |
| *MIR190A* |  | GC15P073129 |
| *MIR134* |  | GC14P104777 |
| *MIR183* |  | GC07M129789 |
| *MIR217* |  | GC02M055982 |
| *MIR99B* |  | GC19P051692 |
| *SCARNA13* |  | GC14M095533 |
| *SNORA64* |  | GC16M002344 |
| *MIR296* |  | GC20M058817 |
| *MIR30D* |  | GC08M134804 |
| *MIR628* |  | GC15M055372 |
| *MIR381* |  | GC14P104797 |
| *MIR1296* |  | GC10M063372 |
| *MIR1260B* |  | GC11P096341 |
| *MIR188* |  | GC0XP050003 |
| *MIR532* |  | GC0XP050004 |
| *MIR500A* |  | GC0XP050008 |
| *IFNG-AS1* |  | GC12P067989 |
| *SCARNA23* |  | GC0XP024744 |
| *GATA6-AS1* |  | GC18M022166 |
| *MIR509-1* |  | GC0XM147260 |
| *IL21-AS1* |  | GC04P122544 |
| *LINC00426* |  | GC13M030340 |
| *CXCR2P1* |  | GC02M218059 |
| *TRERNA1* |  | GC20M050040 |
| *LINC02384* |  | GC12M068334 |
| *ENSG00000280878* | | GC02P115328 |
| *LOC105377938* | | GC06P110475 |
| *GPX1* |  | GC03M049368 |
| *IL1RAPL2* |  | GC0XP104566 |
| *ITPA* |  | GC20P003189 |
| *DSC1* |  | GC18M031129 |
| *EPHX1* |  | GC01P225810 |
| *IRS1* |  | GC02M226731 |
| *LDHA* |  | GC11P018394 |
| *EWSR1* |  | GC22P029269 |
| *S1PR1* |  | GC01P101236 |
| *HCG22* |  | GC06P031053 |
| *TPT1* |  | GC13M045333 |
| *SOAT1* |  | GC01P179262 |
| *TNFSF12-TNFSF13* | | GC17P008016 |
| *CD3D* |  | GC11M118338 |
| *NUGGC* |  | GC08M028021 |
| *N4BP2* |  | GC04P040058 |
| *BCLAF1* |  | GC06M136256 |
| *EXOC2* |  | GC06M000485 |
| *CDKN2D* |  | GC19M010566 |
| *OGG1* |  | GC03P009751 |
| *E2F6* |  | GC02M011434 |
| *UGT1A6* |  | GC02P233691 |
| *EOMES* |  | GC03M027715 |
| *NOD1* |  | GC07M030424 |
| *BUB1B* |  | GC15P040161 |
| *TF* |  | GC03P133666 |
| *DST* |  | GC06M056457 |
| *RBFOX2* |  | GC22M035738 |
| *IMMT* |  | GC02M086144 |
| *NEU1* |  | GC06M031857 |
| *COPS5* |  | GC08M067043 |
| *HDAC3* |  | GC05M141583 |
| *CASP8AP2* |  | GC06P089829 |
| *ITGB7* |  | GC12M053191 |
| *BECN1* |  | GC17M042810 |
| *NRP1* |  | GC10M033177 |
| *PTGER4* |  | GC05P040679 |
| *IRF2* |  | GC04M184387 |
| *DTX3L* |  | GC03P122564 |
| *EIF6* |  | GC20M035278 |
| *ERCC5* |  | GC13P102808 |
| *AHR* |  | GC07P016916 |
| *VIP* |  | GC06P152750 |
| *GATA3-AS1* |  | GC10M008016 |
| *NTRK3* |  | GC15M087859 |
| *NOP56* |  | GC20P002999 |
| *CYP2C9* |  | GC10P094938 |
| *THBS1* |  | GC15P039581 |
| *LBR* |  | GC01M225401 |
| *TNFSF9* |  | GC19P006531 |
| *KDM5B* |  | GC01M202696 |
| *ABCC2* |  | GC10P099782 |
| *GLI3* |  | GC07M041960 |
| *CX3CR1* |  | GC03M039279 |
| *SP1* |  | GC12P053380 |
| *TBP* |  | GC06P170554 |
| *RUNX2* |  | GC06P047549 |
| *LTA4H* |  | GC12M096000 |
| *KIF5B* |  | GC10M032035 |
| *RXRB* |  | GC06M033193 |
| *FBN2* |  | GC05M128257 |
| *IDO1* |  | GC08P039891 |
| *STMN1* |  | GC01M025884 |
| *IL9R* |  | GC0XP155997 |
| *ITPR3* |  | GC06P033620 |
| *HLA-DOB* |  | GC06M032823 |
| *CBS* |  | GC21M043053 |
| *CD63* |  | GC12M055725 |
| *CYBA* |  | GC16M088643 |
| *SPINK2* |  | GC04M056809 |
| *CD14* |  | GC05M140631 |
| *MUC16* |  | GC19M008848 |
| *PCDH15* |  | GC10M053802 |
| *LY75* |  | GC02M159803 |
| *NOP58* |  | GC02P202265 |
| *PLK2* |  | GC05M058453 |
| *PRKCH* |  | GC14P061187 |
| *RETN* |  | GC19P007669 |
| *SDHB* |  | GC01M017020 |
| *FOSL1* |  | GC11M065909 |
| *ALOX12* |  | GC17P006995 |
| *LILRA4* |  | GC19M054333 |
| *TAP1* |  | GC06M032865 |
| *GH1* |  | GC17M063917 |
| *NTRK2* |  | GC09P084668 |
| *F3* |  | GC01M094530 |
| *CSNK2B* |  | GC06P047308 |
| *CCR1* |  | GC03M046218 |
| *NLRP3* |  | GC01P247415 |
| *TACR1* |  | GC02M075010 |
| *MB* |  | GC22M035606 |
| *ZNF423* |  | GC16M049487 |
| *IL23A* |  | GC12P056335 |
| *SH2B2* |  | GC07P102286 |
| *PREX2* |  | GC08P067952 |
| *GSK3B* |  | GC03M119821 |
| *KLF4* |  | GC09M107484 |
| *INSR* |  | GC19M007112 |
| *CYP1B1* |  | GC02M038034 |
| *CYP1A2* |  | GC15P074748 |
| *IL12A* |  | GC03P159988 |
| *PIK3C2A* |  | GC11M017191 |
| *CHD4* |  | GC12M006570 |
| *KRT14* |  | GC17M041582 |
| *CRHR1* |  | GC17P045784 |
| *CAMP* |  | GC03P048266 |
| *FOXN1* |  | GC17P028506 |
| *PSMB9* |  | GC06P047342 |
| *RHEB* |  | GC07M151466 |
| *DMD* |  | GC0XM031047 |
| *SMPD2* |  | GC06P109440 |
| *IFNL3* |  | GC19M039243 |
| *ICAM2* |  | GC17M064002 |
| *CDCA7* |  | GC02P173354 |
| *HSPB1* |  | GC07P076302 |
| *FUS* |  | GC16P031180 |
| *CEP72* |  | GC05P000612 |
| *KRBOX4* |  | GC0XP046446 |
| *KRT5* |  | GC12M052514 |
| *EHMT1* |  | GC09P137618 |
| *PRTN3* |  | GC19P000840 |
| *RUVBL2* |  | GC19P048993 |
| *RNF168* |  | GC03M196468 |
| *COL17A1* |  | GC10M104031 |
| *KRT13* |  | GC17M041500 |
| *ZMPSTE24* |  | GC01P040258 |
| *INPP5D* |  | GC02P233059 |
| *LASP1* |  | GC17P038869 |
| *PRUNE2* |  | GC09M076611 |
| *ENSG00000277468* | | GC14P095670 |
| *ENSG00000275033* | | GC14P095662 |
| *LOC109648317* | | GC21P035233 |
| *HK2* |  | GC02P074833 |
| *CAT* |  | GC11P034460 |
| *RUNX3* |  | GC01M024899 |
| *PRLR* |  | GC05M035048 |
| *TBK1* |  | GC12P064451 |
| *MYBPC3* |  | GC11M061124 |
| *KRT17* |  | GC17M041619 |
| *CNTNAP2* |  | GC07P146116 |
| *RPL15* |  | GC03P023960 |
| *SERPINF1* |  | GC17P001761 |
| *LRP4* |  | GC11M061111 |
| *GC* |  | GC04M071741 |
| *RPS17* |  | GC15M082536 |
| *KLK6* |  | GC19M050958 |
| *PTP4A2* |  | GC01M031907 |
| *SMTN* |  | GC22P031081 |
| *PI3* |  | GC20P045174 |
| *CCL13* |  | GC17P034356 |
| *DEFB4A* |  | GC08P007895 |
| *IBSP* |  | GC04P087799 |
| *CENPC* |  | GC04M067471 |
| *LTV1* |  | GC06P143843 |
| *H2BC21* |  | GC01M149950 |
| *MIR365A* |  | GC16P014309 |
| *MIR4481* |  | GC10M012696 |
| *SERPINE1* |  | GC07P101127 |
| *XRCC3* |  | GC14M103697 |
| *PWWP3A* |  | GC19P001364 |
| *CXCR2* |  | GC02P218125 |
| *SLC29A1* |  | GC06P044219 |
| *BBC3* |  | GC19M047220 |
| *PTBP1* |  | GC19P000797 |
| *MGAT5* |  | GC02P134119 |
| *ZEB2* |  | GC02M144384 |
| *PACSIN2* |  | GC22M042835 |
| *PON1* |  | GC07M095297 |
| *PDE4B* |  | GC01P065792 |
| *SLC12A5* |  | GC20P046021 |
| *NCOA5* |  | GC20M046060 |
| *SLC12A5-AS1* |  | GC20M046015 |
| *piR-35380* |  | GC20M046062 |
| *GRAMD1B* |  | GC11P123358 |
| *ERAP1* |  | GC05M096760 |
| *CD302* |  | GC02M159769 |
| *CSNK2A1* |  | GC20M000472 |
| *CAST* |  | GC05P096525 |
| *DDIT3* |  | GC12M057516 |
| *CUL1* |  | GC07P148697 |
| *AURKB* |  | GC17M008864 |
| *RARB* |  | GC03P024830 |
| *MIR129-2* |  | GC11P043640 |
| *BTLA* |  | GC03M112463 |
| *NCOA1* |  | GC02P024492 |
| *GSTM3* |  | GC01M109733 |
| *RPS6* |  | GC09M019375 |
| *MAPK10* |  | GC04M085990 |
| *MMP1* |  | GC11M102810 |
| *ZEB1* |  | GC10P031318 |
| *HBEGF* |  | GC05M140332 |
| *RPL11* |  | GC01P023691 |
| *ALDH1A2* |  | GC15M060613 |
| *NRXN1* |  | GC02M049918 |
| *LCAT* |  | GC16M067939 |
| *MASP1* |  | GC03M187216 |
| *IL5RA* |  | GC03M003066 |
| *GYPA* |  | GC04M144109 |
| *SEMA3A* |  | GC07M083955 |
| *TAF1* |  | GC0XP071366 |
| *COL4A2* |  | GC13P110305 |
| *RPS10* |  | GC06M042209 |
| *OCRL* |  | GC0XP129539 |
| *TDP1* |  | GC14P089954 |
| *MAFB* |  | GC20M040685 |
| *MAGI2* |  | GC07M078017 |
| *ACD* |  | GC16M067658 |
| *CMA1* |  | GC14M024506 |
| *TRAF3IP2* |  | GC06M111555 |
| *UBTF* |  | GC17M044205 |
| *DSC3* |  | GC18M030990 |
| *EPX* |  | GC17P058192 |
| *KDM5A* |  | GC12M000280 |
| *RPS29* |  | GC14M049570 |
| *VPS11* |  | GC11P119067 |
| *CDK3* |  | GC17P076007 |
| *SERPINB1* |  | GC06M002833 |
| *SRP72* |  | GC04P056466 |
| *KLK7* |  | GC19M050977 |
| *RARRES2* |  | GC07M150333 |
| *S100A12* |  | GC01M153373 |
| *RBBP6* |  | GC16P024537 |
| *LYAR* |  | GC04M004269 |
| *SMG7* |  | GC01P183441 |
| *CERS6* |  | GC02P168455 |
| *NECTIN1* |  | GC11M119624 |
| *ZNF687* |  | GC01P151281 |
| *DEFA3* |  | GC08M007015 |
| *TSGA10* |  | GC02M098997 |
| *MAGEA8* |  | GC0XP149881 |
| *SNU13* |  | GC22M045409 |
| *NAF1* |  | GC04M163109 |
| *FAM71E1* |  | GC19M050466 |
| *TFDP3* |  | GC0XM133216 |
| *PLAAT4* |  | GC11P063542 |
| *MIR452* |  | GC0XM151959 |
| *MMP3* |  | GC11M102835 |
| *PRPF6* |  | GC20P063981 |
| *NOS3* |  | GC07P150990 |
| *CNR1* |  | GC06M088139 |
| *SELPLG* |  | GC12M108621 |
| *IGF2BP3* |  | GC07M023316 |
| *SGMS1* |  | GC10M050305 |
| *SELP* |  | GC01M169558 |
| *IGFBP3* |  | GC07M045912 |
| *MIR1207* |  | GC08P128049 |
| *GPX4* |  | GC19P001103 |
| *EBI3* |  | GC19P004232 |
| *MAN2A1* |  | GC05P109689 |
| *PCSK9* |  | GC01P055039 |
| *TH* |  | GC11M002163 |
| *CASR* |  | GC03P122183 |
| *CYP24A1* |  | GC20M054153 |
| *MYF6* |  | GC12P080707 |
| *NACC1* |  | GC19P013117 |
| *PRDM10* |  | GC11M129899 |
| *MIR503* |  | GC0XM134626 |
| *BANCR* |  | GC09M069296 |
| *ALDH1L1* |  | GC03M126103 |
| *CASP6* |  | GC04M109688 |
| *ITSN2* |  | GC02M024203 |
| *SERPINB2* |  | GC18P063871 |
| *TUBB3* |  | GC16P089919 |
| *SOX4* |  | GC06P021593 |
| *SERPINA9* |  | GC14M094462 |
| *PAG1* |  | GC08M080967 |
| *EED* |  | GC11P086244 |
| *GFI1* |  | GC01M092474 |
| *CEP290* |  | GC12M088049 |
| *CTNND1* |  | GC11P057788 |
| *ARAP3* |  | GC05M141653 |
| *BTNL2* |  | GC06M032393 |
| *MDFI* |  | GC06P047500 |
| *MIR6891* |  | GC06M031355 |
| *PIK3R2* |  | GC19P018153 |
| *GNA11* |  | GC19P003094 |
| *APRT* |  | GC16M088810 |
| *ENPP1* |  | GC06P131808 |
| *DSG2* |  | GC18P031498 |
| *DSC2* |  | GC18M031058 |
| *RPL35A* |  | GC03P197949 |
| *CFP* |  | GC0XM047624 |
| *SUV39H1* |  | GC0XP048698 |
| *CEACAM5* |  | GC19P041709 |
| *CHD8* |  | GC14M021385 |
| *SPTBN2* |  | GC11M066684 |
| *TRIM5* |  | GC11M005693 |
| *RAD52* |  | GC12M000912 |
| *FLG* |  | GC01M152274 |
| *CTDSPL* |  | GC03P037861 |
| *DIS3* |  | GC13M072752 |
| *PRG2* |  | GC11M057386 |
| *RBP3* |  | GC10P047348 |
| *RBP1* |  | GC03M139517 |
| *CREB3* |  | GC09P035722 |
| *DSPP* |  | GC04P087608 |
| *E2F7* |  | GC12M077021 |
| *IVL* |  | GC01P152881 |
| *NSA2* |  | GC05P074766 |
| *CLEC4C* |  | GC12M007695 |
| *NOP53* |  | GC19P047747 |
| *LORICRIN* |  | GC01P153262 |
| *MIR129-1* |  | GC07P128207 |
| *MIR498* |  | GC19P054606 |
| *PAK1* |  | GC11M077321 |
| *CPQ* |  | GC08P096645 |
| *MIR26A1* |  | GC03P037969 |
| *SOD1* |  | GC21P031659 |
| *CKS1B* |  | GC01P154974 |
| *ICAM3* |  | GC19M010335 |
| *SIT1* |  | GC09M035640 |
| *SLC2A3* |  | GC12M007919 |
| *CASP5* |  | GC11M104995 |
| *LOC106867047* | | GC08P127733 |
| *PTPRJ* |  | GC11P048002 |
| *GNLY* |  | GC02P085685 |
| *TXNIP* |  | GC01M145992 |
| *LETMD1* |  | GC12P051047 |
| *EPHX2* |  | GC08P027490 |
| *MCF2* |  | GC0XM139581 |
| *TSC22D3* |  | GC0XM107713 |
| *ATF3* |  | GC01P212565 |
| *ANGPT2* |  | GC08M006499 |
| *SMAD7* |  | GC18M048919 |
| *UBC* |  | GC12M124911 |
| *FURIN* |  | GC15P090868 |
| *IL27* |  | GC16M028511 |
| *LTK* |  | GC15M041503 |
| *CCR2* |  | GC03P046356 |
| *CYP3A7* |  | GC07M099705 |
| *CYP3A43* |  | GC07P099829 |
| *BOK* |  | GC02P241558 |
| *BAGE* |  | GC21U900396 |
| *MTHFS* |  | GC15M079833 |
| *AGPAT1* |  | GC06M032168 |
| *HLA-DMB* |  | GC06M032934 |
| *HLA-DOA* |  | GC06M033004 |
| *ATF6B* |  | GC06M032115 |
| *VPS52* |  | GC06M033251 |
| *GPSM3* |  | GC06M032647 |
| *HLA-DRB6* |  | GC06M032693 |
| *HLA-DQB1-AS1* | | GC06P032659 |
| *SRRM1P1* |  | GC08M127086 |
| *TSBP1-AS1* |  | GC06P049132 |
| *RNVU1-32* |  | GC08P128003 |
| *ENSG00000286364* | | GC06P000453 |
| *lnc-FAM84B-7* | | GC08M127811 |
| *CD47* |  | GC03M108043 |
| *AR* |  | GC0XP067544 |
| *AHCY* |  | GC20M034276 |
| *GNAQ* |  | GC09M077716 |
| *ABCA1* |  | GC09M104781 |
| *MVK* |  | GC12P109573 |
| *PLG* |  | GC06P160702 |
| *SLC12A6* |  | GC15M034229 |
| *CA8* |  | GC08M060187 |
| *FAH* |  | GC15P080152 |
| *ADSL* |  | GC22P040346 |
| *OAT* |  | GC10M124397 |
| *CYP27A1* |  | GC02P218781 |
| *CYP27B1* |  | GC12M057757 |
| *ASAH1* |  | GC08M018055 |
| *SLC9A6* |  | GC0XP135985 |
| *TYRP1* |  | GC09P012683 |
| *LPAR6* |  | GC13M048389 |
| *FGF23* |  | GC12M004368 |
| *ATP7A* |  | GC0XP077927 |
| *AMT* |  | GC03M049417 |
| *ALDH1A3* |  | GC15P100877 |
| *AGL* |  | GC01P099850 |
| *CYP2R1* |  | GC11M014877 |
| *SCN10A* |  | GC03M038713 |
| *PNKP* |  | GC19M049861 |
| *TBX2* |  | GC17P061399 |
| *RALA* |  | GC07P039622 |
| *ESD* |  | GC13M046771 |
| *CRYAA* |  | GC21P043169 |
| *IL17RA* |  | GC22P017086 |
| *PADI4* |  | GC01P017308 |
| *SAG* |  | GC02P233311 |
| *SATB2* |  | GC02M199269 |
| *SLC34A1* |  | GC05P177380 |
| *UCP1* |  | GC04M140559 |
| *RBBP8* |  | GC18P022798 |
| *RBP4* |  | GC10M093591 |
| *PRPS2* |  | GC0XP012791 |
| *CYP26A1* |  | GC10P093073 |
| *UBE2G2* |  | GC21M044768 |
| *AREG* |  | GC04P074445 |
| *BGN* |  | GC0XP153494 |
| *MGST2* |  | GC04P139665 |
| *CRABP2* |  | GC01M156701 |
| *CDKL5* |  | GC0XP018425 |
| *MYH3* |  | GC17M010628 |
| *RPL26* |  | GC17M008377 |
| *CRX* |  | GC19P047819 |
| *SFRP4* |  | GC07M037912 |
| *UGP2* |  | GC02P063840 |
| *LDLRAP1* |  | GC01P025574 |
| *SNX3* |  | GC06M108211 |
| *FANCM* |  | GC14P045135 |
| *MBD4* |  | GC03M129430 |
| *ABCG8* |  | GC02P043828 |
| *BSCL2* |  | GC11M063438 |
| *GTF2IRD1* |  | GC07P074461 |
| *CLCN5* |  | GC0XP049922 |
| *CERK* |  | GC22M046684 |
| *DMP1* |  | GC04P087650 |
| *MOCOS* |  | GC18P036187 |
| *PFAS* |  | GC17P008247 |
| *RPS26* |  | GC12P056043 |
| *INPP4A* |  | GC02P098465 |
| *TERF2IP* |  | GC16P075647 |
| *GJD2* |  | GC15M034751 |
| *FABP5* |  | GC08P081282 |
| *FAM20C* |  | GC07P000192 |
| *ASAH2* |  | GC10M050182 |
| *ERCC8* |  | GC05M060868 |
| *EREG* |  | GC04P074366 |
| *CIDEC* |  | GC03M009866 |
| *CERS1* |  | GC19M018868 |
| *NEUROD2* |  | GC17M039603 |
| *HPS1* |  | GC10M098416 |
| *IL17B* |  | GC05M149371 |
| *SPINK5* |  | GC05P148025 |
| *SLC34A3* |  | GC09P137230 |
| *NXN* |  | GC17M000799 |
| *UNC119* |  | GC17M028546 |
| *PUS1* |  | GC12P131929 |
| *KLK8* |  | GC19M050996 |
| *DCT* |  | GC13M094436 |
| *IL36RN* |  | GC02P115306 |
| *GLIS2* |  | GC16P004428 |
| *AP1S3* |  | GC02M223751 |
| *ALDH3B2* |  | GC11M067662 |
| *AACS* |  | GC12P125065 |
| *HOXA2* |  | GC07M027100 |
| *CDSN* |  | GC06M031115 |
| *RHCE* |  | GC01M025360 |
| *MYF5* |  | GC12P080716 |
| *CD200R1* |  | GC03M112921 |
| *GRHL2* |  | GC08P101492 |
| *DEK* |  | GC06M018224 |
| *COL27A1* |  | GC09P114827 |
| *IFT122* |  | GC03P129440 |
| *SLC35A2* |  | GC0XM048903 |
| *PHEX* |  | GC0XP022032 |
| *UNC45B* |  | GC17P035148 |
| *PUS7* |  | GC07M105439 |
| *STRA6* |  | GC15M074179 |
| *KIF4A* |  | GC0XP070290 |
| *NBEAL2* |  | GC03P046979 |
| *S100A7* |  | GC01M153457 |
| *WDFY3* |  | GC04M084669 |
| *APOBEC1* |  | GC12M007649 |
| *ASPM* |  | GC01M197084 |
| *ADGRG1* |  | GC16P057610 |
| *A2ML1* |  | GC12P008822 |
| *CTNNA3* |  | GC10M065912 |
| *CLC* |  | GC19M042451 |
| *CHGB* |  | GC20P005911 |
| *IL20* |  | GC01P206866 |
| *PRRT2* |  | GC16P029811 |
| *RRAGD* |  | GC06M089364 |
| *SLX4* |  | GC16M003581 |
| *TNS1* |  | GC02M217799 |
| *RAB39B* |  | GC0XM155259 |
| *KIF14* |  | GC01M200521 |
| *RDH10* |  | GC08P073294 |
| *SUPT5H* |  | GC19P039436 |
| *KANSL1* |  | GC17M046031 |
| *TMEM165* |  | GC04P055395 |
| *STIM2* |  | GC04P026859 |
| *STAP1* |  | GC04P067558 |
| *RBBP5* |  | GC01M205055 |
| *UBR4* |  | GC01M019074 |
| *ASMT* |  | GC0XP001595 |
| *CAMKV* |  | GC03M049967 |
| *SERPINB4* |  | GC18M063637 |
| *NYX* |  | GC0XP041447 |
| *SLC12A8* |  | GC03M125082 |
| *IL36G* |  | GC02P112973 |
| *FLG2* |  | GC01M152321 |
| *ARID4A* |  | GC14P058298 |
| *ARID4B* |  | GC01M235133 |
| *LYPD1* |  | GC02M132644 |
| *MAGEA11* |  | GC0XP149688 |
| *MDGA1* |  | GC06M042236 |
| *MBD5* |  | GC02P148021 |
| *CRNN* |  | GC01M152381 |
| *CHD6* |  | GC20M041402 |
| *CERS5* |  | GC12M050129 |
| *CFHR2* |  | GC01P196943 |
| *DGKK* |  | GC0XM050365 |
| *ELAVL3* |  | GC19M011451 |
| *PEF1* |  | GC01M031630 |
| *IL20RA* |  | GC06M136999 |
| *IGDCC3* |  | GC15M065327 |
| *PPFIA2* |  | GC12M081257 |
| *SDR16C5* |  | GC08M056300 |
| *SLC9A7* |  | GC0XM046599 |
| *IQSEC2* |  | GC0XM053225 |
| *UPK1A* |  | GC19P038225 |
| *RDH16* |  | GC12M056951 |
| *POLD4* |  | GC11M067350 |
| *IL36A* |  | GC02P113005 |
| *GAR1* |  | GC04P109815 |
| *MEI1* |  | GC22P041699 |
| *GARS1* |  | GC07P030595 |
| *FAM111B* |  | GC11P059107 |
| *FBXL19* |  | GC16P030934 |
| *MDFIC* |  | GC07P114922 |
| *GULP1* |  | GC02P188291 |
| *RTTN* |  | GC18M070003 |
| *NMRAL1* |  | GC16M004461 |
| *ORMDL2* |  | GC12P055817 |
| *LIN54* |  | GC04M082909 |
| *TARS1* |  | GC05P033441 |
| *STOML1* |  | GC15M073978 |
| *TLX2* |  | GC02P074514 |
| *PRDM8* |  | GC04P080183 |
| *KRT24* |  | GC17M040697 |
| *ZNF426* |  | GC19M009528 |
| *ZNF346* |  | GC05P177022 |
| *MAGEA10* |  | GC0XM152133 |
| *MAGEA6* |  | GC0XM152766 |
| *ALLC* |  | GC02P003649 |
| *MBTD1* |  | GC17M051177 |
| *MEX3D* |  | GC19M001554 |
| *MEPE* |  | GC04P087821 |
| *BCDIN3D* |  | GC12M049839 |
| *ADGRV1* |  | GC05P090529 |
| *RNASE7* |  | GC14P021042 |
| *CNTNAP3* |  | GC09M039064 |
| *DNAJC21* |  | GC05P034929 |
| *DCLRE1B* |  | GC01P113905 |
| *SOHLH1* |  | GC09M135693 |
| *SERPINB13* |  | GC18P063586 |
| *IFITM5* |  | GC11M000298 |
| *SCML4* |  | GC06M107701 |
| *ENOSF1* |  | GC18M000664 |
| *SMPDL3B* |  | GC01P027945 |
| *UGT1A8* |  | GC02P233618 |
| *RBBP9* |  | GC20M018486 |
| *INSL6* |  | GC09M004991 |
| *E2F8* |  | GC11M019203 |
| *S100A7A* |  | GC01P153416 |
| *TATDN1* |  | GC08M124488 |
| *VPS16* |  | GC20P002840 |
| *MED29* |  | GC19P039392 |
| *ADA2* |  | GC22M017179 |
| *RMND5B* |  | GC05P178130 |
| *GMCL1* |  | GC02P069829 |
| *PNPLA5* |  | GC22M043879 |
| *TPTE2* |  | GC13M019422 |
| *TNP1* |  | GC02M216859 |
| *ZYG11B* |  | GC01P052726 |
| *FAM186B* |  | GC12M049582 |
| *LYNX1* |  | GC08M142800 |
| *LUZP4* |  | GC0XP115289 |
| *ARSL* |  | GC0XM002934 |
| *HECA* |  | GC06P139135 |
| *PAGR1* |  | GC16P030096 |
| *LAMP5* |  | GC20P009514 |
| *TRUB2* |  | GC09M128322 |
| *TCF15* |  | GC20M000603 |
| *ZG16* |  | GC16P029760 |
| *ZYG11A* |  | GC01P052842 |
| *CAVIN1* |  | GC17M042404 |
| *ETAA1* |  | GC02P067397 |
| *MAGEA9* |  | GC0XP149781 |
| *ANKAR* |  | GC02P189674 |
| *AAMDC* |  | GC11P077822 |
| *C1orf112* |  | GC01P169662 |
| *CENPV* |  | GC17M016342 |
| *PRSS54* |  | GC16M058313 |
| *PLBD2* |  | GC12P113358 |
| *OR5AK2* |  | GC11P056988 |
| *ISX* |  | GC22P035066 |
| *L3MBTL4* |  | GC18M005954 |
| *STN1* |  | GC10M103878 |
| *SUCO* |  | GC01P172532 |
| *TMEM178A* |  | GC02P039664 |
| *ZNF529* |  | GC19M043482 |
| *MAGEA2* |  | GC0XM152749 |
| *C2orf49* |  | GC02P105337 |
| *MISP* |  | GC19P000752 |
| *NCKAP5L* |  | GC12M049791 |
| *SOHLH2* |  | GC13M036169 |
| *PRRT3* |  | GC03M009945 |
| *PWWP2B* |  | GC10P132397 |
| *NME1-NME2* |  | GC17P051153 |
| *SYS1* |  | GC20P045361 |
| *ZNF362* |  | GC01P033256 |
| *UTP4* |  | GC16P069132 |
| *YY2* |  | GC0XP021855 |
| *CAVIN2* |  | GC02M191835 |
| *CDR1* |  | GC0XM140782 |
| *TEN1* |  | GC17P075983 |
| *CIPC* |  | GC14P077099 |
| *OOEP* |  | GC06M073368 |
| *KLLN* |  | GC10M087860 |
| *TENT4B* |  | GC16P050378 |
| *CNTNAP3B* |  | GC09M041890 |
| *MAGEA2B* |  | GC0XP152714 |
| *SLC66A1* |  | GC01P019313 |
| *LCE3C* |  | GC01P152600 |
| *TENT5C* |  | GC01P117606 |
| *MAGEA5* |  | GC0XM152116 |
| *IGHG3* |  | GC14M109523 |
| *LCE3B* |  | GC01P152613 |
| *USF3* |  | GC03M113649 |
| *PAXX* |  | GC09P136993 |
| *DOP1A* |  | GC06P083068 |
| *SPATA46* |  | GC01M162373 |
| *GCNA* |  | GC0XP071578 |
| *MIR369* |  | GC14P104789 |
| *MIR215* |  | GC01M220117 |
| *MIR409* |  | GC14P104806 |
| *BDNF-AS* |  | GC11P027513 |
| *MIR491* |  | GC09P020716 |
| *MIR492* |  | GC12P094834 |
| *SCARNA8* |  | GC09M019069 |
| *MIR376C* |  | GC14P104793 |
| *MIR675* |  | GC11M001997 |
| *MIR487B* |  | GC14P104812 |
| *RN7SL1* |  | GC14P049630 |
| *RTEL1-TNFRSF6B* | | GC20P063657 |
| *SNORA56* |  | GC0XP154774 |
| *MIR299* |  | GC14P104780 |
| *MACROD2-AS1* | | GC20M014866 |
| *MIR198* |  | GC03M120395 |
| *MIR518B* |  | GC19P054620 |
| *MIR379* |  | GC14P104795 |
| *MIR501* |  | GC0XP050074 |
| *MIR495* |  | GC14P104815 |
| *SNORA15* |  | GC07P056145 |
| *SNORA24* |  | GC04P118279 |
| *SNORA67* |  | GC17P008046 |
| *MIR362* |  | GC0XP050072 |
| *BCDIN3D-AS1* | | GC12P049828 |
| *CCAT1* |  | GC08M127207 |
| *MIR513A1* |  | GC0XM147213 |
| *MIR513A2* |  | GC0XM147225 |
| *SLURP2* |  | GC08M142802 |
| *MIR3681* |  | GC02P012199 |
| *TCF4-AS1* |  | GC18P055453 |
| *PRINS* |  | GC10U900902 |
| *TRI-AAT4-1* |  | GC17M008874 |
| *TRT-AGT1-2* |  | GC17M008869 |
| *TRS-AGA2-6* |  | GC17M008873 |
| *PNPP1* |  | GC02M076259 |
| *ENSG00000235775* | | GC05M132163 |
| *LOC110806306* | | GC03P169764 |
| *PDPK1* |  | GC16P002537 |
| *SKP1* |  | GC05M134148 |
| *TRAF5* |  | GC01P211326 |
| *YBX1* |  | GC01P042682 |
| *TBL1XR1* |  | GC03M177019 |
| *HPSE* |  | GC04M083292 |
| *CYP17A1* |  | GC10M102830 |
| *PBK* |  | GC08M027809 |
| *RING1* |  | GC06P033208 |
| *PTK2B* |  | GC08P027311 |
| *ERBB4* |  | GC02M211375 |
| *HMGCR* |  | GC05P075336 |
| *HACE1* |  | GC06M104728 |
| *HSPA1A* |  | GC06P047326 |
| *PDLIM7* |  | GC05M177483 |
| *FOSL2* |  | GC02P028392 |
| *CNR2* |  | GC01M023870 |
| *UGCG* |  | GC09P111896 |
| *LGALS7* |  | GC19M038770 |
| *UBE2N* |  | GC12M093406 |
| *KLRB1* |  | GC12M013855 |
| *TIMP3* |  | GC22P032800 |
| *LILRB1* |  | GC19P055408 |
| *IL13RA1* |  | GC0XP118727 |
| *AKR1C1* |  | GC10P004963 |
| *MT2A* |  | GC16P056627 |
| *NAPSA* |  | GC19M050385 |
| *MX1* |  | GC21P041420 |
| *COLQ* |  | GC03M015815 |
| *WDR48* |  | GC03P039093 |
| *IKZF2* |  | GC02M213001 |
| *AKR1A1* |  | GC01P045550 |
| *IGL* |  | GC22P022026 |
| *CAMK1* |  | GC03M009774 |
| *CAMK1D* |  | GC10P012349 |
| *CSNK2A2* |  | GC16M058157 |
| *ALOX15* |  | GC17M004630 |
| *NCOR1* |  | GC17M016029 |
| *TNP2* |  | GC16M011267 |
| *NOTCH4* |  | GC06M032648 |
| *CISH* |  | GC03M050618 |
| *TUBB* |  | GC06P030720 |
| *GNAI1* |  | GC07P079769 |
| *RASSF1* |  | GC03M050329 |
| *CD74* |  | GC05M150378 |
| *DUSP2* |  | GC02M096168 |
| *IL13RA2* |  | GC0XM115003 |
| *BCAT1* |  | GC12M024732 |
| *SYMPK* |  | GC19M045815 |
| *ENOX2* |  | GC0XM130623 |
| *BRI3BP* |  | GC12P124993 |
| *ODC1* |  | GC02M010432 |
| *NCL* |  | GC02M231453 |
| *TUBA1B* |  | GC12M049127 |
| *CLSTN2* |  | GC03P139935 |
| *HBS1L* |  | GC06M134960 |
| *PAPOLG* |  | GC02P060756 |
| *HCG26* |  | GC06P047299 |
| *TNFAIP2* |  | GC14P104642 |
| *HSPA5* |  | GC09M125234 |
| *NFATC2* |  | GC20M051386 |
| *PDGFA* |  | GC07M000497 |
| *RAD23B* |  | GC09P107283 |
| *DLC1* |  | GC08M013083 |
| *ERG* |  | GC21M038367 |
| *UBE2D2* |  | GC05P139526 |
| *NFATC1* |  | GC18P079395 |
| *ABCB11* |  | GC02M168922 |
| *BNIP3* |  | GC10M131966 |
| *CCNH* |  | GC05M087311 |
| *TCF7* |  | GC05P134114 |
| *UBASH3B* |  | GC11P122655 |
| *MCRS1* |  | GC12M049557 |
| *COMMD3* |  | GC10P022315 |
| *RTP2* |  | GC03M187698 |
| *CDC25B* |  | GC20P003787 |
| *SORL1* |  | GC11P121452 |
| *CD276* |  | GC15P073683 |
| *IGLV@* |  | GC22U990033 |
| *SLC17A5* |  | GC06M073593 |
| *MAPK11* |  | GC22M050263 |
| *CSNK1A1* |  | GC05M149492 |
| *FCGR1A* |  | GC01P149754 |
| *NPPB* |  | GC01M011858 |
| *SEC31A* |  | GC04M082818 |
| *MMP7* |  | GC11M102425 |
| *TAF3* |  | GC10P007860 |
| *HCP5* |  | GC06P031400 |
| *LTB* |  | GC06M032590 |
| *ESR2* |  | GC14M064084 |
| *JARID2* |  | GC06P015246 |
| *LPXN* |  | GC11M061238 |
| *ENG* |  | GC09M127815 |
| *NR1H2* |  | GC19P050329 |
| *SWAP70* |  | GC11P009664 |
| *NENF* |  | GC01P212432 |
| *NAA15* |  | GC04P139301 |
| *MAGEC2* |  | GC0XM142202 |
| *ASTL* |  | GC02M096123 |
| *SPRY2* |  | GC13M080335 |
| *PKM* |  | GC15M072199 |
| *DFFB* |  | GC01P003797 |
| *SIRPA* |  | GC20P001894 |
| *XRCC2* |  | GC07M152644 |
| *MTDH* |  | GC08P097643 |
| *DFFA* |  | GC01M010456 |
| *BAG3* |  | GC10P119651 |
| *TTR* |  | GC18P031557 |
| *RNF182* |  | GC06P013924 |
| *ACP1* |  | GC02P000254 |
| *USP9X* |  | GC0XP041085 |
| *HBB* |  | GC11M005352 |
| *BUB1* |  | GC02M110637 |
| *JAM3* |  | GC11P134068 |
| *MAP3K8* |  | GC10P030458 |
| *FOXM1* |  | GC12M002857 |
| *PLAT* |  | GC08M042174 |
| *DDB1* |  | GC11M061563 |
| *VTCN1* |  | GC01M117143 |
| *MIR19B1* |  | GC13P091435 |
| *RRM1* |  | GC11P004115 |
| *SIN3A* |  | GC15M075369 |
| *ZFP91* |  | GC11P058580 |
| *ZFP91-CNTF* |  | GC11P058579 |
| *OR10Q2P* |  | GC11M058291 |
| *LOC101928354* | | GC06M014461 |
| *CEBPE* |  | GC14M023117 |
| *ATF1* |  | GC12P050763 |
| *ANG* |  | GC14P020830 |
| *HMOX1* |  | GC22P035380 |
| *AKR1C3* |  | GC10P005035 |
| *TGIF1* |  | GC18P003411 |
| *RPSA* |  | GC03P039406 |
| *SMAD1* |  | GC04P145481 |
| *ANK1* |  | GC08M041653 |
| *S100A1* |  | GC01P153627 |
| *ADAM10* |  | GC15M058588 |
| *ANXA2* |  | GC15M060347 |
| *MYH9* |  | GC22M036281 |
| *TRIM28* |  | GC19P058544 |
| *VCP* |  | GC09M035056 |
| *C6orf15* |  | GC06M031111 |
| *MMP11* |  | GC22P023768 |
| *PTK2* |  | GC08M140657 |
| *CTCF* |  | GC16P067563 |
| *CCKBR* |  | GC11P006259 |
| *XDH* |  | GC02M031294 |
| *LOC107980440* | | GC09P130710 |
| *HTRA2* |  | GC02P074529 |
| *BCL2L10* |  | GC15M060649 |
| *LNX2* |  | GC13M027545 |
| *EDN1* |  | GC06P012290 |
| *SLC6A4* |  | GC17M030194 |
| *USP2* |  | GC11M119355 |
| *RASA1* |  | GC05P087267 |
| *APEX1* |  | GC14P020455 |
| *PSMB5* |  | GC14M023016 |
| *NR0B2* |  | GC01M026922 |
| *S1PR2* |  | GC19M010223 |
| *ELAVL1* |  | GC19M007958 |
| *COMT* |  | GC22P019941 |
| *KALRN* |  | GC03P124033 |
| *NUBP1* |  | GC16P010743 |
| *KIN* |  | GC10M007750 |
| *TCF19* |  | GC06P047294 |
| *NCAPH2* |  | GC22P050508 |
| *TPRG1* |  | GC03P188948 |
| *PRM2* |  | GC16M011324 |
| *HUS1B* |  | GC06M000655 |
| *RGS21* |  | GC01P192286 |
| *PRM3* |  | GC16M011273 |
| *CYP21A1P* |  | GC06P032005 |
| *HCG23* |  | GC06P047338 |
| *HNRNPCP4* |  | GC16P011242 |
| *ENSG00000234084* | | GC06P135301 |
| *ENSG00000224374* | | GC06P135259 |
| *ENSG00000232638* | | GC10P008051 |
| *ENSG00000212228* | | GC16M011326 |
| *ENSG00000263033* | | GC16P011196 |
| *ENSG00000263307* | | GC16P011851 |
| *ENSG00000285280* | | GC01M192167 |
| *RN7SKP226* |  | GC08P128220 |
| *ENSG00000230433* | | GC06P000524 |
| *ENSG00000262020* | | GC16M011066 |
| *LOC107984859* | | GC16P011213 |
| *ENSG00000287094* | | GC06P135323 |
| *MN298114-200* | | GC06M031041 |
| *lnc-HLA-DRB1-8* | | GC06M032619 |
| *NONHSAG005179.2-001* | | GC10P008054 |
| *NONHSAG005179.2-002* | | GC10P008064 |
| *lnc-HBS1L-1* |  | GC06M135284 |
| *RF00017-5428* | | GC06M032849 |
| *RF00994-074* |  | GC01M192558 |
| *RF00994-713* |  | GC03M188237 |
| *HSALNG0049408* | | GC06P047616 |
| *lnc-IRF4-5* |  | GC06P000481 |
| *LOC105371664* | | GC01M192517 |
| *HSALNG0109576* | | GC16M011130 |
| *NONHSAG042527.2* | | GC06P000452 |
| *LOC107984204* | | GC10M008054 |
| *piR-38580-216* | | GC03P188181 |
| *TANK* |  | GC02P161136 |
| *MRPL28* |  | GC16M000357 |
| *IL4I1* |  | GC19M049890 |
| *LTBR* |  | GC12P006375 |
| *STAT2* |  | GC12M056341 |
| *TCN2* |  | GC22P030606 |
| *PTPRZ1* |  | GC07P121873 |
| *RACK1* |  | GC05M181310 |
| *MIR101-1* |  | GC01M065058 |
| *PAX8* |  | GC02M113215 |
| *LIME1* |  | GC20P063736 |
| *PPIL2* |  | GC22P025098 |
| *NDOR1* |  | GC09P137205 |
| *ENOX1* |  | GC13M043213 |
| *HEMGN* |  | GC09M097927 |
| *DEDD2* |  | GC19M042198 |
| *FCRL6* |  | GC01P159800 |
| *CAMK2N2* |  | GC03M184259 |
| *LINC00114* |  | GC21M038738 |
| *WNT2* |  | GC07M117276 |
| *LMNB1* |  | GC05P126776 |
| *MAPK12* |  | GC22M050246 |
| *NFE2L2* |  | GC02M177227 |
| *VHL* |  | GC03P010211 |
| *HMGA1* |  | GC06P047417 |
| *UBE2D1* |  | GC10P058334 |
| *CCL7* |  | GC17P034270 |
| *MTF1* |  | GC01M037810 |
| *CBFA2T3* |  | GC16M088874 |
| *TRADD* |  | GC16M067154 |
| *NPY* |  | GC07P024290 |
| *TSPO* |  | GC22P043151 |
| *LYVE1* |  | GC11M010653 |
| *HSPA8* |  | GC11M123057 |
| *RAP1A* |  | GC01P111542 |
| *RNF31* |  | GC14P024146 |
| *CCL18* |  | GC17P036064 |
| *UBE2D3* |  | GC04M102794 |
| *ANGPT1* |  | GC08M107246 |
| *POLR2L* |  | GC11M000829 |
| *ARHGAP24* |  | GC04P085475 |
| *LOC108254682* | | GC09P037034 |
| *ULBP1* |  | GC06P149963 |
| *CORO1C* |  | GC12M108645 |
| *LCN1* |  | GC09P135521 |
| *CDK20* |  | GC09M087966 |
| *TET1* |  | GC10P068560 |
| *H3-4* |  | GC01M228427 |
| *SLC16A1* |  | GC01M112913 |
| *KIR2DL2* |  | GC19Mr00108 |
| *RXRA* |  | GC09P134317 |
| *ETV7* |  | GC06M042229 |
| *CRBN* |  | GC03M003144 |
| *SMAD3* |  | GC15P067063 |
| *PRPF8* |  | GC17M001650 |
| *RFX1* |  | GC19M013961 |
| *BHMT* |  | GC05P079111 |
| *TAPBP* |  | GC06M033299 |
| *PLEKHG2* |  | GC19P039412 |
| *POLR1D* |  | GC13P027620 |
| *CDC42BPB* |  | GC14M102932 |
| *MDN1* |  | GC06M089642 |
| *HNRNPA2B1* |  | GC07M026174 |
| *RIOX2* |  | GC03M097942 |
| *CDK5* |  | GC07M151053 |
| *RRAGC* |  | GC01M038844 |
| *BCHE* |  | GC03M165772 |
| *DNAJB1* |  | GC19M014514 |
| *CA9* |  | GC09P035673 |
| *MIR205* |  | GC01P209432 |
| *GMNN* |  | GC06P024779 |
| *PPP2R2A* |  | GC08P026292 |
| *EBAG9* |  | GC08P109536 |
| *GATD3A* |  | GC21P044134 |
| *FOXP2* |  | GC07P114086 |
| *CARS1* |  | GC11M003000 |
| *FGR* |  | GC01M027622 |
| *IL12RB2* |  | GC01P067307 |
| *SPTA1* |  | GC01M158610 |
| *MST1R* |  | GC03M049958 |
| *BCL2L12* |  | GC19P049665 |
| *PRDX6* |  | GC01P173477 |
| *ISL1* |  | GC05P051383 |
| *SPHK2* |  | GC19P048619 |
| *CTAG1B* |  | GC0XM154617 |
| *PRKCZ* |  | GC01P002050 |
| *PCDH10* |  | GC04P133149 |
| *STAG1* |  | GC03M136336 |
| *CNTF* |  | GC11P058622 |
| *SP110* |  | GC02M230167 |
| *SRP14* |  | GC15M040035 |
| *MIR34C* |  | GC11P111582 |
| *MIR4491* |  | GC11P111347 |
| *ST14* |  | GC11P130159 |
| *ST6GAL1* |  | GC03P186930 |
| *MTA3* |  | GC02P042494 |
| *NAMPT* |  | GC07M106248 |
| *CAMK2G* |  | GC10M073812 |
| *KDM1A* |  | GC01P023019 |
| *ANXA6* |  | GC05M151077 |
| *CTSD* |  | GC11M001752 |
| *FGFR4* |  | GC05P177086 |
| *CSK* |  | GC15P074782 |
| *CYBB* |  | GC0XP037780 |
| *DLL1* |  | GC06M170282 |
| *GNE* |  | GC09M036214 |
| *HSD17B1* |  | GC17P042548 |
| *AGK* |  | GC07P141551 |
| *TUBGCP2* |  | GC10M133278 |
| *ATG9B* |  | GC07M151012 |
| *ID1* |  | GC20P031605 |
| *LMNB2* |  | GC19M002439 |
| *PBX2* |  | GC06M032184 |
| *ZMIZ1* |  | GC10P079068 |
| *KNL1* |  | GC15P040595 |
| *CFB* |  | GC06P031945 |
| *EIF4G1* |  | GC03P184314 |
| *DLL4* |  | GC15P040929 |
| *SMAD2* |  | GC18M047809 |
| *SEL1L* |  | GC14M081471 |
| *ENPP2* |  | GC08M119556 |
| *FECH* |  | GC18M057544 |
| *PTPN13* |  | GC04P086594 |
| *SRI* |  | GC07M088205 |
| *MAPK9* |  | GC05M180234 |
| *TMPO* |  | GC12P098515 |
| *YWHAZ* |  | GC08M100917 |
| *RUNX1T1* |  | GC08M091954 |
| *PDLIM3* |  | GC04M185500 |
| *CDH13* |  | GC16P082626 |
| *CTBP1* |  | GC04M001211 |
| *WNT16* |  | GC07P121325 |
| *PRRT1* |  | GC06M032643 |
| *EIF4A1* |  | GC17P007572 |
| *NOS1* |  | GC12M117208 |
| *RYR1* |  | GC19P038528 |
| *CASP4* |  | GC11M104942 |
| *ITPR1* |  | GC03P004486 |
| *MAP3K5* |  | GC06M136557 |
| *SOX5* |  | GC12M023529 |
| *TRRAP* |  | GC07P098877 |
| *ETV5* |  | GC03M186046 |
| *RGS13* |  | GC01P192636 |
| *NECTIN2* |  | GC19P044849 |
| *NEDD9* |  | GC06M011183 |
| *DVL2* |  | GC17M007225 |
| *BMF* |  | GC15M040087 |
| *ELL2* |  | GC05M095885 |
| *CRAT* |  | GC09M129094 |
| *TTF2* |  | GC01P117060 |
| *ADGRE5* |  | GC19P014381 |
| *MIR199A2* |  | GC01M172235 |
| *KIR2DS4* |  | GC19P055443 |
| *RPS27A* |  | GC02P055231 |
| *BTG1* |  | GC12M092140 |
| *BDNF* |  | GC11M027654 |
| *COL3A1* |  | GC02P188974 |
| *STK38* |  | GC06M036493 |
| *APOBEC3B* |  | GC22P038982 |
| *LGALS3BP* |  | GC17M078971 |
| *CKAP2* |  | GC13P052455 |
| *MZB1* |  | GC05M139387 |
| *PRRC2A* |  | GC06P047307 |
| *FOXO4* |  | GC0XP071095 |
| *KDM2B* |  | GC12M121402 |
| *NCR3* |  | GC06M031588 |
| *FES* |  | GC15P090883 |
| *YWHAQ* |  | GC02M009583 |
| *ATG5* |  | GC06M106045 |
| *KIR2DS2* |  | GC19MR00122 |
| *MAD2L1* |  | GC04M120055 |
| *GAL* |  | GC11P068684 |
| *SFPQ* |  | GC01M035176 |
| *RPL7* |  | GC08M073290 |
| *PHB2* |  | GC12M006965 |
| *SYCP1* |  | GC01P114854 |
| *HILPDA* |  | GC07P129436 |
| *MT-CO2* |  | GCMTP007587 |
| *HLA-S* |  | GC06M031381 |
| *B3GALT4* |  | GC06P033277 |
| *RPS18* |  | GC06P047372 |
| *HLA-F* |  | GC06P047251 |
| *SNX2* |  | GC05P122774 |
| *CIRBP* |  | GC19P001259 |
| *ANKRD6* |  | GC06P089433 |
| *DAZAP1* |  | GC19P001407 |
| *FBXW8* |  | GC12P116910 |
| *BTG4* |  | GC11M111385 |
| *PAN3* |  | GC13P028136 |
| *ZBED4* |  | GC22P049853 |
| *MSH3* |  | GC05P080654 |
| *MAGI1* |  | GC03M065330 |
| *NAPRT* |  | GC08M143574 |
| *MIR497* |  | GC17M007022 |
| *F2RL1* |  | GC05P076818 |
| *ZFYVE9* |  | GC01P052142 |
| *EEF2* |  | GC19M003976 |
| *IGFBP1* |  | GC07P046552 |
| *HDAC8* |  | GC0XM072329 |
| *SERPING1* |  | GC11P057597 |
| *HAMP* |  | GC19P038216 |
| *APOC3* |  | GC11P116829 |
| *PSMC4* |  | GC19P039972 |
| *ISG20* |  | GC15P088635 |
| *MCM6* |  | GC02M135839 |
| *PIM3* |  | GC22P049960 |
| *DRD2* |  | GC11M113409 |
| *ATP6V1B2* |  | GC08P020197 |
| *GRHPR* |  | GC09P037412 |
| *CDC6* |  | GC17P040287 |
| *SHMT2* |  | GC12P057229 |
| *SHC3* |  | GC09M089005 |
| *LGALS8* |  | GC01P236518 |
| *HIC1* |  | GC17P002054 |
| *EIF3I* |  | GC01P032221 |
| *SLC16A4* |  | GC01M110362 |
| *MIR135B* |  | GC01M205448 |
| *IGKV1-5* |  | GC02M089154 |
| *AXL* |  | GC19P041219 |
| *PXN* |  | GC12M120210 |
| *DOCK2* |  | GC05P169637 |
| *MMP10* |  | GC11M102770 |
| *PCBP1* |  | GC02P070087 |
| *CTAGE6* |  | GC07M143755 |
| *CTAGE8* |  | GC07M144266 |
| *BCL9P1* |  | GC05P067636 |
| *ENSG00000288592* | | GC15M079899 |
| *ENSG00000274549* | | GC13M037139 |
| *ARHGDIB* |  | GC12M014942 |
| *IDUA* |  | GC04P000986 |
| *HMMR* |  | GC05P163480 |
| *PATZ1* |  | GC22M031325 |
| *LOC107963951* | | GC22P024884 |
| *UBE2I* |  | GC16P001415 |
| *WEE1* |  | GC11P009573 |
| *POLI* |  | GC18P054274 |
| *INCENP* |  | GC11P062142 |
| *KIR3DS1* |  | GC19MR00058 |
| *APOBEC3G* |  | GC22P039078 |
| *PELI1* |  | GC02M064092 |
| *MAL* |  | GC02P095025 |
| *MAGI3* |  | GC01P113390 |
| *RORC* |  | GC01M151806 |
| *CDC7* |  | GC01P091500 |
| *CDT1* |  | GC16P088803 |
| *RNPEP* |  | GC01P201982 |
| *MIR133A1* |  | GC18M021826 |
| *MIR320D1* |  | GC13M040728 |
| *PLCB2* |  | GC15M040278 |
| *SP140* |  | GC02P230203 |
| *ACOXL* |  | GC02P110732 |
| *MIR1208* |  | GC08P128150 |
| *PRDX1* |  | GC01M045511 |
| *ITGB3* |  | GC17P047254 |
| *JDP2* |  | GC14P075427 |
| *TSPAN32* |  | GC11P002302 |
| *TGFB2* |  | GC01P218345 |
| *JAG1* |  | GC20M010637 |
| *ITGA6* |  | GC02P172427 |
| *SIRT3* |  | GC11M000215 |
| *BRIP1* |  | GC17M061679 |
| *TGFB3* |  | GC14M075958 |
| *HSF1* |  | GC08P144291 |
| *MAP4* |  | GC03M047850 |
| *NFKBIB* |  | GC19P038899 |
| *POMGNT2* |  | GC03M043121 |
| *MYEOV* |  | GC11P069295 |
| *SKI* |  | GC01P002228 |
| *TP53I3* |  | GC02M024078 |
| *ZBTB17* |  | GC01M015943 |
| *TNFSF14* |  | GC19M006663 |
| *EIF2S1* |  | GC14P067359 |
| *RBX1* |  | GC22P040951 |
| *PSME3* |  | GC17P042824 |
| *PRKN* |  | GC06M161348 |
| *C5AR1* |  | GC19P047290 |
| *CCN2* |  | GC06M131948 |
| *PTPRA* |  | GC20P002864 |
| *PTPN7* |  | GC01M202147 |
| *SPARC* |  | GC05M151639 |
| *SLC22A1* |  | GC06P160121 |
| *PSMD9* |  | GC12P122847 |
| *GSTA1* |  | GC06M052791 |
| *PITRM1* |  | GC10M003138 |
| *PDE7B* |  | GC06P135795 |
| *POLR3K* |  | GC16M000046 |
| *ERAP2* |  | GC05P096875 |
| *GPER1* |  | GC07P001188 |
| *IFN1@* |  | GC09U990039 |
| *WNT5A* |  | GC03M055465 |
| *CUL3* |  | GC02M224470 |
| *TOP2B* |  | GC03M025598 |
| *METAP2* |  | GC12P095473 |
| *CABIN1* |  | GC22P024011 |
| *LGALS9* |  | GC17P027629 |
| *KLRC4* |  | GC12M013866 |
| *HSP90AB1* |  | GC06P044246 |
| *HCLS1* |  | GC03M121631 |
| *TEP1* |  | GC14M020365 |
| *EFS* |  | GC14M023356 |
| *CXCL16* |  | GC17M004733 |
| *CXCR6* |  | GC03P045982 |
| *MIR548M* |  | GC0XM095063 |
| *EPHA2* |  | GC01M016124 |
| *ITGAV* |  | GC02P186589 |
| *DLX5* |  | GC07M097020 |
| *SALL4* |  | GC20M051784 |
| *PDPN* |  | GC01P013583 |
| *SLC30A1* |  | GC01M211571 |
| *RECK* |  | GC09P036036 |
| *SSBP3* |  | GC01M054225 |
| *NOX5* |  | GC15P072888 |
| *KIR2DS3* |  | GC19MR00031 |
| *KIR2DS5* |  | GC19Mr00079 |
| *KIR2DL5A* |  | GC19MR00046 |
| *KIR2DS1* |  | GC19Mr00063 |
| *GLRX* |  | GC05M095752 |
| *EIF2AK4* |  | GC15P039934 |
| *SKIV2L* |  | GC06P047331 |
| *TFEB* |  | GC06M042295 |
| *IL1RL1* |  | GC02P102294 |
| *DHX16* |  | GC06M030653 |
| *GJA10* |  | GC06P089894 |
| *DTNB* |  | GC02M025378 |
| *NFKBIL1* |  | GC06P047302 |
| *HLA-F-AS1* |  | GC06M030844 |
| *CBX4* |  | GC17M079833 |
| *KDM6B* |  | GC17P007834 |
| *S100P* |  | GC04P006700 |
| *TNFRSF10D* |  | GC08M023135 |
| *PGF* |  | GC14M074941 |
| *MIR125B2* |  | GC21P016590 |
| *HRH2* |  | GC05P175659 |
| *GAB2* |  | GC11M078215 |
| *ENDOG* |  | GC09P128818 |
| *CRTC2* |  | GC01M153947 |
| *CFHR1* |  | GC01P196788 |
| *ALOX5AP* |  | GC13P030713 |
| *MIF* |  | GC22P023894 |
| *PRKAB1* |  | GC12P119632 |
| *DNAH8* |  | GC06P047481 |
| *ZNF521* |  | GC18M025061 |
| *ROBO1* |  | GC03M078597 |
| *SLCO1B3* |  | GC12P020810 |
| *APOBEC3C* |  | GC22P039014 |
| *EPAS1* |  | GC02P046293 |
| *PKD1* |  | GC16M002348 |
| *RNF2* |  | GC01P185045 |
| *LILRB2* |  | GC19M054409 |
| *PHC1* |  | GC12P008913 |
| *IL32* |  | GC16P004242 |
| *FGA* |  | GC04M154583 |
| *CDC34* |  | GC19P000532 |
| *EFNB1* |  | GC0XP068828 |
| *APOB* |  | GC02M020956 |
| *C1QA* |  | GC01P022636 |
| *CRK* |  | GC17M001420 |
| *GSTO1* |  | GC10P104235 |
| *CCN1* |  | GC01P085581 |
| *ALKAL1* |  | GC08M052535 |
| *ALKAL2* |  | GC02M000279 |
| *DDR1* |  | GC06P047288 |
| *CETP* |  | GC16P056961 |
| *TGFBR3* |  | GC01M091680 |
| *ARID1A* |  | GC01P026693 |
| *DLK1* |  | GC14P104663 |
| *RNASET2* |  | GC06M166929 |
| *TFR2* |  | GC07M100620 |
| *DOK1* |  | GC02P074549 |
| *GUK1* |  | GC01P228139 |
| *TAB1* |  | GC22P039401 |
| *PTPRT* |  | GC20M042072 |
| *SOD3* |  | GC04P024798 |
| *IL22RA1* |  | GC01M024119 |
| *PFDN5* |  | GC12P053295 |
| *MYCL* |  | GC01M039895 |
| *TNFAIP8L2* |  | GC01P151129 |
| *EPHA7* |  | GC06M093240 |
| *ACSF3* |  | GC16P089088 |
| *PDCD4* |  | GC10P110871 |
| *KLF10* |  | GC08M102648 |
| *NTSR2* |  | GC02M011649 |
| *SIGLEC1* |  | GC20M003686 |
| *GPR65* |  | GC14P088005 |
| *NRG4* |  | GC15M075935 |
| *FUBP1* |  | GC01M077944 |
| *FTH1* |  | GC11M061959 |
| *GJA1* |  | GC06P121436 |
| *RPS6KA1* |  | GC01P026540 |
| *EDNRB* |  | GC13M077895 |
| *CP* |  | GC03M149162 |
| *CDH3* |  | GC16P068637 |
| *HNF1A* |  | GC12P120978 |
| *PAX7* |  | GC01P018631 |
| *MTA1* |  | GC14P105419 |
| *CCT6B* |  | GC17M034927 |
| *SHBG* |  | GC17P007613 |
| *RNPC3* |  | GC01P103525 |
| *ERCC4* |  | GC16P013920 |
| *MBD2* |  | GC18M054151 |
| *EPHB4* |  | GC07M100803 |
| *TXNRD1* |  | GC12P104215 |
| *CYP2C19* |  | GC10P094762 |
| *CLTC* |  | GC17P059619 |
| *TXNRD2* |  | GC22M019863 |
| *TTK* |  | GC06P080003 |
| *PLA2G2A* |  | GC01M019975 |
| *AHSG* |  | GC03P186612 |
| *FCER1G* |  | GC01P161215 |
| *EIF4B* |  | GC12P053006 |
| *PTPRG* |  | GC03P061522 |
| *H1-1* |  | GC06M026018 |
| *SH2D4B* |  | GC10P083671 |
| *QDPR* |  | GC04M017460 |
| *CYB5B* |  | GC16P069424 |
| *TOMM20* |  | GC01M235109 |
| *SPHK1* |  | GC17P076376 |
| *SHARPIN* |  | GC08M144098 |
| *BAG4* |  | GC08P038176 |
| *PGR* |  | GC11M100943 |
| *TIRAP* |  | GC11P126284 |
| *NCF4* |  | GC22P036860 |
| *SGK1* |  | GC06M134169 |
| *OTX2* |  | GC14M056799 |
| *GPX3* |  | GC05P150997 |
| *PLIN2* |  | GC09M019115 |
| *ITM2B* |  | GC13P048233 |
| *CLTCL1* |  | GC22M019171 |
| *ZFP36* |  | GC19P039406 |
| *CCL1* |  | GC17M034402 |
| *EPHB2* |  | GC01P022710 |
| *ABCA3* |  | GC16M002275 |
| *SMO* |  | GC07P129463 |
| *ACTN4* |  | GC19P038647 |
| *MYH10* |  | GC17M008474 |
| *SLC22A5* |  | GC05P132369 |
| *HTR3A* |  | GC11P113974 |
| *PTPRO* |  | GC12P015366 |
| *TUBB4B* |  | GC09P137241 |
| *DGKQ* |  | GC04M000942 |
| *TSN* |  | GC02P121737 |
| *SYNE1* |  | GC06M152121 |
| *TPM4* |  | GC19P023264 |
| *DUSP19* |  | GC02P183078 |
| *SNRPA1* |  | GC15M101281 |
| *FCRL1* |  | GC01M157764 |
| *CALB2* |  | GC16P071392 |
| *DLEC1* |  | GC03P038038 |
| *MZF1* |  | GC19M058609 |
| *CA4* |  | GC17P060149 |
| *CHKB* |  | GC22M050578 |
| *CSNK1G2* |  | GC19P001941 |
| *PAK6* |  | GC15P040217 |
| *SCO2* |  | GC22M050523 |
| *FABP3* |  | GC01M031365 |
| *DOT1L* |  | GC19P002164 |
| *PFKFB3* |  | GC10P006144 |
| *SNCAIP* |  | GC05P122311 |
| *PTRH2* |  | GC17M059674 |
| *PPIF* |  | GC10P083661 |
| *SLC4A7* |  | GC03M027372 |
| *PGC* |  | GC06M041736 |
| *BRD1* |  | GC22M049773 |
| *CELF2* |  | GC10P010462 |
| *AP3D1* |  | GC19M002101 |
| *LSM2* |  | GC06M032632 |
| *ANO10* |  | GC03M043396 |
| *AP1M1* |  | GC19P023267 |
| *GRIN3B* |  | GC19P001000 |
| *PEX13* |  | GC02P061017 |
| *PHF1* |  | GC06P047388 |
| *USP6NL* |  | GC10M011453 |
| *ULK4* |  | GC03M041239 |
| *MARCKS* |  | GC06P113857 |
| *AMN* |  | GC14P102922 |
| *ALG12* |  | GC22M049859 |
| *ABCF1* |  | GC06P030571 |
| *ATP8B3* |  | GC19M001804 |
| *RGL2* |  | GC06M033291 |
| *IP6K3* |  | GC06M033721 |
| *TINAGL1* |  | GC01P031576 |
| *TUBGCP6* |  | GC22M050217 |
| *LEMD2* |  | GC06M033772 |
| *PPP1R10* |  | GC06M030600 |
| *PLXNB2* |  | GC22M050274 |
| *SRMS* |  | GC20M063539 |
| *RBM17* |  | GC10P006088 |
| *FAM111A* |  | GC11P059142 |
| *ATP6V1G2* |  | GC06M032586 |
| *ALDH8A1* |  | GC06M134917 |
| *CHAC1* |  | GC15P040942 |
| *IL20RB* |  | GC03P136946 |
| *TUBD1* |  | GC17M059859 |
| *UQCR11* |  | GC19M001597 |
| *TAF8* |  | GC06P042050 |
| *ZGPAT* |  | GC20P063707 |
| *VMP1* |  | GC17P059707 |
| *FKBPL* |  | GC06M032642 |
| *BTBD2* |  | GC19M001985 |
| *CUTA* |  | GC06M033417 |
| *DHX40* |  | GC17P059565 |
| *RNF126* |  | GC19M000647 |
| *CNRIP1* |  | GC02M068248 |
| *SERINC2* |  | GC01P031409 |
| *SF3A2* |  | GC19P002236 |
| *PALM* |  | GC19P000708 |
| *OLIG3* |  | GC06M137492 |
| *SLC2A4RG* |  | GC20P063739 |
| *TNPO2* |  | GC19M012699 |
| *WDR46* |  | GC06M033279 |
| *BAHD1* |  | GC15P040439 |
| *MED16* |  | GC19M000869 |
| *DNAJC17* |  | GC15M040765 |
| *RNFT1* |  | GC17M059952 |
| *UPF3A* |  | GC13P114281 |
| *UQCC2* |  | GC06M033694 |
| *TMEM30B* |  | GC14M061277 |
| *HSH2D* |  | GC19P023265 |
| *ZNF512B* |  | GC20M063956 |
| *ZBTB46* |  | GC20M063743 |
| *FSIP1* |  | GC15M039594 |
| *KIAA1841* |  | GC02P061033 |
| *WDR18* |  | GC19P000983 |
| *TRABD* |  | GC22P050185 |
| *TMEM163* |  | GC02M134455 |
| *SPPL2B* |  | GC19P002328 |
| *ZBTB9* |  | GC06P033453 |
| *YPEL2* |  | GC17P059331 |
| *LMF2* |  | GC22M050502 |
| *NRM* |  | GC06M030895 |
| *MCCD1* |  | GC06P031528 |
| *CIB3* |  | GC19M016135 |
| *SAMD10* |  | GC20M063974 |
| *SLC35G2* |  | GC03P136818 |
| *RABL2B* |  | GC22M050767 |
| *TMEM259* |  | GC19M001010 |
| *ODF3B* |  | GC22M050529 |
| *C6orf47* |  | GC06M032610 |
| *LY6G5B* |  | GC06P047314 |
| *FBXO48* |  | GC02M068460 |
| *C2orf74* |  | GC02P061146 |
| *ANKRD63* |  | GC15M040293 |
| *SFTA2* |  | GC06M030972 |
| *OR5B21* |  | GC11M061237 |
| *PLK5* |  | GC19P001520 |
| *SYCE3* |  | GC22M050551 |
| *FNDC11* |  | GC20P063548 |
| *CCDC32* |  | GC15M040529 |
| *AHSA2P* |  | GC02P061179 |
| *COLCA2* |  | GC11P111298 |
| *MUC22* |  | GC06P031005 |
| *TSBP1* |  | GC06M032288 |
| *COLCA1* |  | GC11M111290 |
| *FAM174C* |  | GC19P001365 |
| *C15orf56* |  | GC15M040250 |
| *HCG27* |  | GC06P031197 |
| *GGNBP1* |  | GC06P047399 |
| *HOATZ* |  | GC11P111589 |
| *CELF2-AS1* |  | GC10M011277 |
| *MIR4435-2HG* | | GC02M111037 |
| *SNORD117* |  | GC06M032581 |
| *CASC11* |  | GC08M127944 |
| *CELF2-AS2* |  | GC10M011071 |
| *RAD51-AS1* |  | GC15M040686 |
| *C20orf181* |  | GC20M063832 |
| *HCG25* |  | GC06P047373 |
| *MYB-AS1* |  | GC06M135195 |
| *SRP14-AS1* |  | GC15P040039 |
| *LINC01185* |  | GC02M060825 |
| *LINC02880* |  | GC06P113906 |
| *LOC642361* |  | GC10P083747 |
| *ACOXL-AS1* |  | GC02M111099 |
| *LOC100288123* | | GC19P001822 |
| *WAKMAR2* |  | GC06M137820 |
| *LINC00378* |  | GC13P060672 |
| *WFDC21P* |  | GC17M060085 |
| *ZBTB46-AS1* |  | GC20P063808 |
| *CHKB-DT* |  | GC22P050584 |
| *MGC32805* |  | GC05M122436 |
| *RNFT1-DT* |  | GC17P059966 |
| *LINC02201* |  | GC05M122629 |
| *LINC02882* |  | GC12M073212 |
| *LINC02541* |  | GC06M113624 |
| *NCK1-DT* |  | GC03M136842 |
| *MICB-DT* |  | GC06M032559 |
| *RNU6-450P* |  | GC17M059847 |
| *RPL13P6* |  | GC14P103041 |
| *RPL15P4* |  | GC06P047301 |
| *NDUFB8P2* |  | GC17P059884 |
| *ENSG00000229167* | | GC01M031572 |
| *ENSG00000229299* | | GC20P063744 |
| *PPIAP9* |  | GC06M031518 |
| *ENSG00000234389* | | GC02P102438 |
| *RPL3P2* |  | GC06P031280 |
| *RPLP0P10* |  | GC15M040312 |
| *ENSG00000231128* | | GC01P113812 |
| *ENSG00000234261* | | GC06M014406 |
| *ENSG00000230533* | | GC06P137657 |
| *ENSG00000251409* | | GC05M095835 |
| *STK19B* |  | GC06P032013 |
| *ENSG00000250362* | | GC05P095861 |
| *ENSG00000259536* | | GC15P040488 |
| *LINC02084* |  | GC03P027714 |
| *ENSG00000272501* | | GC06M031195 |
| *LINC01980* |  | GC03P027798 |
| *ENSG00000269243* | | GC19M016123 |
| *LINC02739* |  | GC11M061260 |
| *RNU6-793P* |  | GC06P014648 |
| *RNU1-134P* |  | GC20P063908 |
| *ENSG00000224738* | | GC17P059106 |
| *ENSG00000224049* | | GC03P187796 |
| *RPS12P3* |  | GC02M060938 |
| *ENSG00000230322* | | GC10M011210 |
| *ENSG00000232876* | | GC06P135055 |
| *ENSG00000249290* | | GC03M140449 |
| *MTCO3P1* |  | GC06M032706 |
| *ENSG00000267317* | | GC19M001725 |
| *ENSG00000268798* | | GC19P001493 |
| *ENSG00000259211* | | GC15M040464 |
| *ENSG00000270096* | | GC03P169794 |
| *ARGFXP1* |  | GC05P122675 |
| *RNU6-40P* |  | GC01M031497 |
| *ENSG00000229044* | | GC01M031333 |
| *ENSG00000224721* | | GC14M075575 |
| *RPL21P33* |  | GC02P060852 |
| *ENSG00000124593* | | GC06P047501 |
| *ENSG00000199332* | | GC06M032548 |
| *ENSG00000231589* | | GC16P062630 |
| *ENSG00000251922* | | GC10M006018 |
| *ENSG00000255139* | | GC11P059568 |
| *ENSG00000257183* | | GC12M074248 |
| *ENSG00000272221* | | GC06M032544 |
| *ENSG00000272540* | | GC06M030903 |
| *ENSG00000272940* | | GC22P050597 |
| *ENSG00000273486* | | GC03M136837 |
| *ENSG00000269570* | | GC11M058611 |
| *LINC02850* |  | GC02P020860 |
| *lnc-BUB1B-9* |  | GC15P040098 |
| *lnc-SRP14-1* |  | GC15M040108 |
| *ENSG00000285163* | | GC16P085924 |
| *lnc-HLA-C-2* |  | GC06M031317 |
| *RNU4-25P* |  | GC08M128010 |
| *ENSG00000242968* | | GC03M136808 |
| *lnc-MAP3K7-3* | | GC06M090088 |
| *ENSG00000236864* | | GC03M187932 |
| *ENSG00000197254* | | GC11P058685 |
| *NONHSAG005220.2* | | GC10P011006 |
| *ENSG00000231912* | | GC06M113791 |
| *ENSG00000229646* | | GC06M014597 |
| *ENSG00000277925* | | GC03M169764 |
| *ENSG00000271581* | | GC06P047295 |
| *ENSG00000272489* | | GC10P083664 |
| *ENSG00000272836* | | GC22M050205 |
| *ENSG00000273137* | | GC22M050208 |
| *ENSG00000273192* | | GC22P049902 |
| *ENSG00000273272* | | GC22P050542 |
| *ENSG00000261012* | | GC02M020999 |
| *RF00017-5434* | | GC06P049016 |
| *RF00017-5438* | | GC06M033566 |
| *piR-57135-036* | | GC06P033712 |
| *lnc-BTG4-3* |  | GC11M111354 |
| *ENSG00000285040* | | GC16M085963 |
| *ENSG00000286631* | | GC06P017016 |
| *lnc-PUS10-2* |  | GC02M060834 |
| *lnc-RHOBTB3-4* | | GC05P095877 |
| *ENSG00000286829* | | GC02P024402 |
| *piR-39342* |  | GC11M061888 |
| *ENSG00000286034* | | GC08P128323 |
| *MG828730-062* | | GC06M031455 |
| *RF00017-5530* | | GC06P049071 |
| *lnc-ZCCHC24-7* | | GC10M079298 |
| *lnc-ECHDC3-8* | | GC10P011253 |
| *lnc-ECHDC3-9* | | GC10P011177 |
| *lnc-DTNBP1-16* | | GC06M014616 |
| *lnc-EPS15L1-5* | | GC19M016161 |
| *RNU6-637P* |  | GC03M169720 |
| *lnc-HLA-DRB5-1-002* | | GC06M032459 |
| *lnc-IL15RA-4* |  | GC10M006043 |
| *MN309357* |  | GC11M061569 |
| *piR-35431* |  | GC06P135056 |
| *lnc-FBXO48-1* | | GC02M068448 |
| *NPM1P51* |  | GC06P041666 |
| *NONHSAG043472.2* | | GC06P047952 |
| *HSALNG0101762* | | GC14M061252 |
| *hsa-miR-5095-258* | | GC19M001765 |
| *lnc-MYB-8* |  | GC06P135096 |
| *lnc-MYC-10* |  | GC08P128221 |
| *lnc-MYC-9* |  | GC08P128172 |
| *NONHSAG015993.2* | | GC14P104835 |
| *piR-30876-061* | | GC02M134294 |
| *RF00017-142* |  | GC01M031203 |
| *piR-47864* |  | GC06M032550 |
| *RF00017-2475* | | GC17P059540 |
| *RF00017-2479* | | GC17P059737 |
| *ENSG00000255093* | | GC11P111448 |
| *piR-38351-410* | | GC06P090225 |
| *piR-52740* |  | GC06M032558 |
| *LOC101927357* | | GC05M122581 |
| *lnc-TYMP-1* |  | GC22M050527 |
| *lnc-ONECUT3-5* | | GC19P001653 |
| *ENSG00000275860* | | GC17P060021 |
| *ENSG00000272821* | | GC22P050523 |
| *piR-32285-033* | | GC17M059775 |
| *RF00017-5441* | | GC06P049020 |
| *lnc-TFEB-2* |  | GC06M041631 |
| *lnc-SLC38A6-2* | | GC14P061281 |
| *ENSG00000287347* | | GC06M016902 |
| *piR-56133-141* | | GC22P050533 |
| *ENSG00000285647* | | GC06P047584 |
| *piR-49732-033* | | GC10M006055 |
| *RF00100-151* |  | GC08P128222 |
| *piR-43099-059* | | GC10M079279 |
| *lnc-GSDMC-22* | | GC08M128166 |
| *lnc-HLA-DQA1-9* | | GC06P047730 |
| *lnc-HLA-DRB1-7* | | GC06M032609 |
| *lnc-HDAC2-8* |  | GC06M113729 |
| *lnc-TMEM163-3* | | GC02M134321 |
| *lnc-GLRX-3* |  | GC05M095900 |
| *MN309188* |  | GC10M079292 |
| *piR-61028-565* | | GC08M128152 |
| *piR-34009-012* | | GC02M068413 |
| *LOC105377890* | | GC06P090183 |
| *ENSG00000220412* | | GC06M137706 |
| *piR-46060-021* | | GC22M050534 |
| *lnc-MYC-20* |  | GC08P128168 |
| *ENSG00000229462* | | GC02M068446 |
| *NONHSAG013086.2* | | GC13P027621 |
| *lnc-IL1RL1-1* |  | GC02P102353 |
| *lnc-IL1RL1-3* |  | GC02P102378 |
| *lnc-ELL2-4* |  | GC05M095855 |
| *RF00017-5802* | | GC06M137662 |
| *piR-49399-010* | | GC06P048682 |
| *lnc-ARFRP1-2* |  | GC20M063787 |
| *piR-60051-090* | | GC06M041659 |
| *piR-60146-113* | | GC03M136871 |
| *piR-52453* |  | GC20M063776 |
| *HSALNG0052913* | | GC06P113725 |
| *HSALNG0068520* | | GC08P128254 |
| *HSALNG0068526* | | GC08M128306 |
| *ENSG00000237901* | | GC16P062391 |
| *LOC105374265* | | GC03M187931 |
| *LOC105378623* | | GC01M031383 |
| *LOC107984652* | | GC14M075556 |
| *HSALNG0049444* | | GC06P047617 |
| *piR-37522* |  | GC03P169756 |
| *LOC107985470* | | GC01P031390 |
| *NCF2* |  | GC01M183555 |
| *GGT1* |  | GC22P024927 |
| *GAS6* |  | GC13M113820 |
| *KCNA3* |  | GC01M110654 |
| *S100A4* |  | GC01M153543 |
| *HNRNPD* |  | GC04M082352 |
| *RPS13* |  | GC11M017179 |
| *ADAM19* |  | GC05M157395 |
| *CSE1L* |  | GC20P049046 |
| *DBN1* |  | GC05M177456 |
| *CBFA2T2* |  | GC20P033490 |
| *CEBPZ* |  | GC02M037201 |
| *LXN* |  | GC03M158645 |
| *PIGY* |  | GC04M088520 |
| *KLRA1P* |  | GC12M013933 |
| *EPHA1* |  | GC07M143390 |
| *PRDX2* |  | GC19M012796 |
| *NEDD8* |  | GC14M024216 |
| *IFITM1* |  | GC11P000313 |
| *HYAL2* |  | GC03M050317 |
| *ZFAS1* |  | GC20P049276 |
| *DVL3* |  | GC03P184155 |
| *EIF4A2* |  | GC03P186783 |
| *CANX* |  | GC05P179678 |
| *RAPGEF3* |  | GC12M047736 |
| *MNX1* |  | GC07M156994 |
| *BCL2L14* |  | GC12P012049 |
| *CAD* |  | GC02P027217 |
| *ROCK1* |  | GC18M020946 |
| *MCM2* |  | GC03P127598 |
| *PTS* |  | GC11P112226 |
| *DGKB* |  | GC07M014145 |
| *CRADD* |  | GC12P093677 |
| *CLEC7A* |  | GC12M013863 |
| *ING1* |  | GC13P110712 |
| *CUL4B* |  | GC0XM120524 |
| *PSMB1* |  | GC06M170535 |
| *FZR1* |  | GC19P003506 |
| *CLEC4M* |  | GC19P007763 |
| *DAP3* |  | GC01P155657 |
| *LGALS4* |  | GC19M042441 |
| *PRKD2* |  | GC19M046674 |
| *F11R* |  | GC01M160995 |
| *PER2* |  | GC02M238244 |
| *SPEN* |  | GC01P015848 |
| *VEGFD* |  | GC0XM015345 |
| *MTHFD2* |  | GC02P074198 |
| *CDH11* |  | GC16M064882 |
| *MCM3* |  | GC06M052264 |
| *NCOA3* |  | GC20P047501 |
| *BCAR1* |  | GC16M075228 |
| *VAV3* |  | GC01M107571 |
| *HPR* |  | GC16P072097 |
| *NPAS2* |  | GC02P100803 |
| *PPP1R13L* |  | GC19M045379 |
| *ORM1* |  | GC09P114323 |
| *NUP88* |  | GC17M005366 |
| *DLX6* |  | GC07P097005 |
| *LLGL1* |  | GC17P018225 |
| *GPR34* |  | GC0XP041688 |
| *SENP6* |  | GC06P075601 |
| *CSN2* |  | GC04M069955 |
| *H1-5* |  | GC06M028364 |
| *MIR187* |  | GC18M035904 |
| *LOC108254684* | | GC09P036916 |
| *MITF* |  | GC03P069788 |
| *TAT* |  | GC16M071565 |
| *IL31RA* |  | GC05P055840 |
| *UBR5* |  | GC08M102252 |
| *MT1A* |  | GC16P056638 |
| *BATF2* |  | GC11M064987 |
| *TRBV6-2* |  | GC07Pi00311 |
| *CARD9* |  | GC09M136361 |
| *PRKAA2* |  | GC01P056645 |
| *KAT2B* |  | GC03P020081 |
| *NPC1* |  | GC18M023506 |
| *PLD2* |  | GC17P004808 |
| *MAP4K2* |  | GC11M064786 |
| *BIN1* |  | GC02M127048 |
| *ADRB3* |  | GC08M037962 |
| *HDAC7* |  | GC12M047782 |
| *INHBA* |  | GC07M041668 |
| *MYO6* |  | GC06P075749 |
| *MASP2* |  | GC01M011026 |
| *APOA2* |  | GC01M161222 |
| *RIPK4* |  | GC21M041739 |
| *CES2* |  | GC16P066934 |
| *DUSP4* |  | GC08M029334 |
| *PRKAG3* |  | GC02M218823 |
| *PRDX4* |  | GC0XP023665 |
| *KPNB1* |  | GC17P047649 |
| *KAT6A* |  | GC08M041929 |
| *CDO1* |  | GC05M115804 |
| *EIF3F* |  | GC11P007966 |
| *EIF4G2* |  | GC11M010866 |
| *UCK2* |  | GC01P165796 |
| *KIF2A* |  | GC05P062306 |
| *PROX1* |  | GC01P213983 |
| *FLII* |  | GC17M018244 |
| *AOC1* |  | GC07P150824 |
| *BICD2* |  | GC09M092711 |
| *CXCL6* |  | GC04P073837 |
| *GH2* |  | GC17M063880 |
| *HRK* |  | GC12M116820 |
| *PFDN4* |  | GC20P054207 |
| *EIF3E* |  | GC08M108201 |
| *EIF3G* |  | GC19M010115 |
| *HNRNPA0* |  | GC05M137750 |
| *THYN1* |  | GC11M134249 |
| *MIR429* |  | GC01P001464 |
| *EPHA4* |  | GC02M221418 |
| *TPI1* |  | GC12P008208 |
| *UBE2C* |  | GC20P045812 |
| *PEPD* |  | GC19M033386 |
| *P4HA2* |  | GC05M132191 |
| *STK39* |  | GC02M167954 |
| *SOCS2* |  | GC12P093569 |
| *NUAK1* |  | GC12M106063 |
| *RELN* |  | GC07M103471 |
| *PPBP* |  | GC04M073986 |
| *BCAP31* |  | GC0XM153701 |
| *KDM3B* |  | GC05P138352 |
| *OTX1* |  | GC02P063050 |
| *CAPG* |  | GC02M085394 |
| *GADD45G* |  | GC09P089605 |
| *SIRT4* |  | GC12P120291 |
| *FGL2* |  | GC07M077193 |
| *ABCA6* |  | GC17M069062 |
| *SESN1* |  | GC06M108986 |
| *TBC1D10C* |  | GC11P067403 |
| *PEBP4* |  | GC08M022713 |
| *ABCA10* |  | GC17M069147 |
| *MIXL1* |  | GC01P226223 |
| *PLA2G7* |  | GC06M046704 |
| *YWHAE* |  | GC17M001346 |
| *RRM2* |  | GC02P010123 |
| *VCAN* |  | GC05P083471 |
| *C5* |  | GC09M120952 |
| *OGT* |  | GC0XP071534 |
| *HGFAC* |  | GC04P003443 |
| *CD93* |  | GC20M023079 |
| *TMSB4X* |  | GC0XP012975 |
| *DEFB1* |  | GC08M006870 |
| *RBFOX1* |  | GC16P005240 |
| *CIP2A* |  | GC03M108545 |
| *MS* |  | GC00U990205 |
| *CEACAM3* |  | GC19P041796 |
| *THBD* |  | GC20M023026 |
| *PTGS1* |  | GC09P122370 |
| *STUB1* |  | GC16P001405 |
| *HSP90B1* |  | GC12P103930 |
| *GPX2* |  | GC14M064939 |
| *BLMH* |  | GC17M030248 |
| *RREB1* |  | GC06P007107 |
| *RCAN1* |  | GC21M034513 |
| *TPX2* |  | GC20P031739 |
| *SETMAR* |  | GC03P004303 |
| *SYVN1* |  | GC11M065122 |
| *SSX2* |  | GC0XM052696 |
| *CNN3* |  | GC01M094896 |
| *TENM2* |  | GC05P166979 |
| *HCG9* |  | GC06P047262 |
| *MIR194-2* |  | GC11M064954 |
| *MIR194-1* |  | GC01M220118 |
| *HAGLROS* |  | GC02P176177 |
| *IGHV3-69-1* |  | GC14M109658 |
| *MLVI4* |  | GC08U990123 |
| *MMP14* |  | GC14P025277 |
| *SLC6A2* |  | GC16P055656 |
| *PLD1* |  | GC03M171600 |
| *SMAD6* |  | GC15P066702 |
| *ADAM12* |  | GC10M126012 |
| *ETFA* |  | GC15M076215 |
| *MCM5* |  | GC22P035400 |
| *NONO* |  | GC0XP071283 |
| *VEGFB* |  | GC11P064234 |
| *MYBL2* |  | GC20P043667 |
| *FLOT1* |  | GC06M030904 |
| *MFAP5* |  | GC12M008637 |
| *MXI1* |  | GC10P110208 |
| *CRY2* |  | GC11P045986 |
| *SP100* |  | GC02P230415 |
| *PTGES* |  | GC09M129738 |
| *UBE2E1* |  | GC03P023805 |
| *INSL3* |  | GC19M017816 |
| *MAZ* |  | GC16P029806 |
| *C4BPA* |  | GC01P207105 |
| *C4BPB* |  | GC01P207088 |
| *CHFR* |  | GC12M132822 |
| *DUSP16* |  | GC12M012473 |
| *CDC42BPA* |  | GC01M226989 |
| *PHLPP1* |  | GC18P062715 |
| *CCDC6* |  | GC10M059788 |
| *BCAS2* |  | GC01M114567 |
| *CIAPIN1* |  | GC16M057428 |
| *SOBP* |  | GC06P107489 |
| *TBC1D9* |  | GC04M140621 |
| *KMT5A* |  | GC12P123385 |
| *RNF181* |  | GC02P085593 |
| *SREK1* |  | GC05P066139 |
| *ABT1* |  | GC06P028762 |
| *H1-4* |  | GC06P028871 |
| *MIR96* |  | GC07M129774 |
| *MSBP1* |  | GC00U990213 |
| *RBPJ* |  | GC04P026165 |
| *ERCC3* |  | GC02M127257 |
| *NR1I2* |  | GC03P119780 |
| *TNFRSF11A* |  | GC18P062325 |
| *ATP6AP2* |  | GC0XP040582 |
| *ENPEP* |  | GC04P110365 |
| *SRD5A1* |  | GC05P006633 |
| *CAV2* |  | GC07P116287 |
| *GNRH1* |  | GC08M025419 |
| *DMC1* |  | GC22M045386 |
| *SETX* |  | GC09M132261 |
| *RYR3* |  | GC15P033310 |
| *STAG3* |  | GC07P100177 |
| *KRIT1* |  | GC07M092198 |
| *FMOD* |  | GC01M203340 |
| *CXCL5* |  | GC04M073995 |
| *SIM1* |  | GC06M100386 |
| *MOS* |  | GC08M056112 |
| *IGSF3* |  | GC01M116574 |
| *SMC2* |  | GC09P104094 |
| *SMC4* |  | GC03P160399 |
| *TRIP6* |  | GC07P100867 |
| *ITGA10* |  | GC01M145891 |
| *HVCN1* |  | GC12M110627 |
| *IK* |  | GC05P143020 |
| *NRBF2* |  | GC10P063133 |
| *LIMA1* |  | GC12M050175 |
| *KHDRBS3* |  | GC08P135457 |
| *ZNF7* |  | GC08P144847 |
| *SPRR1A* |  | GC01P152984 |
| *TENM1* |  | GC0XM124375 |
| *DIXDC1* |  | GC11P111927 |
| *H2AC4* |  | GC06M026034 |
| *TRBC1* |  | GC07P144963 |
| *TRBV6-1* |  | GC07P144927 |
| *TRBV4-1* |  | GC07P144925 |
| *TRBV16* |  | GC07P145153 |
| *IGKV@* |  | GC02U990059 |
| *LOC107963955* | | GC22P024885 |
| *ERBB3* |  | GC12P056094 |
| *IRAK4* |  | GC12P043758 |
| *MELK* |  | GC09P036572 |
| *MKNK1* |  | GC01M046557 |
| *SLIT2* |  | GC04P020287 |
| *PTGDS* |  | GC09P136982 |
| *ITCH* |  | GC20P034363 |
| *C1QB* |  | GC01P022652 |
| *C1QC* |  | GC01P022643 |
| *APOC2* |  | GC19P044945 |
| *C2* |  | GC06P031897 |
| *CFD* |  | GC19P000859 |
| *DYRK2* |  | GC12P067558 |
| *CDC20* |  | GC01P043358 |
| *EFNB2* |  | GC13M106489 |
| *VIPR2* |  | GC07M159028 |
| *C9* |  | GC05M039320 |
| *C8B* |  | GC01M056929 |
| *EBP* |  | GC0XP048521 |
| *CNTFR* |  | GC09M034551 |
| *SFRP1* |  | GC08M041238 |
| *C6* |  | GC05M041142 |
| *C7* |  | GC05P040909 |
| *BHLHE40* |  | GC03P004997 |
| *CAPZA2* |  | GC07P116811 |
| *CYTH1* |  | GC17M078674 |
| *RPLP2* |  | GC11P000891 |
| *RAP1GDS1* |  | GC04P098261 |
| *TCP1* |  | GC06M159778 |
| *CAPZB* |  | GC01M019339 |
| *RGS16* |  | GC01M182598 |
| *RPLP1* |  | GC15P072895 |
| *SMARCA5* |  | GC04P143513 |
| *B4GALT3* |  | GC01M161171 |
| *FAU* |  | GC11M065120 |
| *TNPO1* |  | GC05P072816 |
| *RAP1GAP* |  | GC01M021596 |
| *BRD8* |  | GC05M138150 |
| *RNF20* |  | GC09P101533 |
| *OTULIN* |  | GC05P014667 |
| *C1RL* |  | GC12M007136 |
| *RFXAP* |  | GC13P036819 |
| *GRK2* |  | GC11P067266 |
| *DEFA6* |  | GC08M006924 |
| *SUN2* |  | GC22M045390 |
| *TIGIT* |  | GC03P114276 |
| *TMSB10* |  | GC02P084905 |
| *RC3H2* |  | GC09M122844 |
| *MT1G* |  | GC16M056666 |
| *ADSS2* |  | GC01M244410 |
| *MELTF* |  | GC03M196987 |
| *MTMR11* |  | GC01M149928 |
| *TMEM183A* |  | GC01P203007 |
| *LOC108348017* | | GC08U902673 |
| *PRKCE* |  | GC02P045651 |
| *PTPRF* |  | GC01P043527 |
| *SLC6A3* |  | GC05M001392 |
| *CYP11B1* |  | GC08M142872 |
| *CYP19A1* |  | GC15M051208 |
| *PPP1CA* |  | GC11M067415 |
| *CARM1* |  | GC19P010871 |
| *CA12* |  | GC15M063321 |
| *CYP11B2* |  | GC08M142910 |
| *GRN* |  | GC17P044345 |
| *NR1H3* |  | GC11P047248 |
| *DRD5* |  | GC04P009783 |
| *HSD3B2* |  | GC01P119414 |
| *STAR* |  | GC08M038145 |
| *CDK7* |  | GC05P069243 |
| *BMP7* |  | GC20M057168 |
| *ADH5* |  | GC04M099070 |
| *HNRNPK* |  | GC09M084056 |
| *HTR1B* |  | GC06M077478 |
| *OSMR* |  | GC05P038845 |
| *LTB4R* |  | GC14P024311 |
| *FDFT1* |  | GC08P011795 |
| *ASCL1* |  | GC12P102957 |
| *AKAP13* |  | GC15P085381 |
| *RICTOR* |  | GC05M038939 |
| *DRD3* |  | GC03M114128 |
| *SEC24D* |  | GC04M118722 |
| *HSD17B2* |  | GC16P082068 |
| *NUP155* |  | GC05M037288 |
| *HMGCS2* |  | GC01M119747 |
| *ORAI1* |  | GC12P122835 |
| *LIPC* |  | GC15P058410 |
| *ARHGEF12* |  | GC11P120336 |
| *PER3* |  | GC01P007785 |
| *SERPINA6* |  | GC14M094341 |
| *HSD3B1* |  | GC01P119507 |
| *OCA2* |  | GC15M027754 |
| *SLC23A1* |  | GC05M139377 |
| *TACSTD2* |  | GC01M058575 |
| *HMGCS1* |  | GC05M043288 |
| *PLAGL1* |  | GC06M143940 |
| *THBS4* |  | GC05P079991 |
| *APOA4* |  | GC11M116820 |
| *ANXA7* |  | GC10M073375 |
| *ALCAM* |  | GC03P105366 |
| *HHEX* |  | GC10P092689 |
| *PDSS1* |  | GC10P026697 |
| *SLC23A2* |  | GC20M004852 |
| *SEC13* |  | GC03M010293 |
| *ARHGEF11* |  | GC01M156904 |
| *EPB41L3* |  | GC18M005382 |
| *FRS2* |  | GC12P069471 |
| *HAVCR1* |  | GC05M157028 |
| *NPC2* |  | GC14M074476 |
| *OPCML* |  | GC11M132414 |
| *INPP5E* |  | GC09M136428 |
| *LIN28B* |  | GC06P104940 |
| *ITGA1* |  | GC05P052788 |
| *DAD1* |  | GC14M022565 |
| *GPC5* |  | GC13P091398 |
| *DTX1* |  | GC12P113056 |
| *EIF3H* |  | GC08M116642 |
| *TAGLN2* |  | GC01M159918 |
| *ACBD3* |  | GC01M226144 |
| *NCR2* |  | GC06P047497 |
| *PARG* |  | GC10M049818 |
| *TRIM22* |  | GC11P005689 |
| *GZMH* |  | GC14M024606 |
| *TCERG1* |  | GC05P146447 |
| *ZFYVE16* |  | GC05P080407 |
| *CLIC3* |  | GC09M136994 |
| *EIF3B* |  | GC07P002354 |
| *GBP5* |  | GC01M089259 |
| *TNFAIP8* |  | GC05P119268 |
| *RBM38* |  | GC20P057391 |
| *EAF2* |  | GC03P121835 |
| *EIF3L* |  | GC22P037848 |
| *EIF3M* |  | GC11P032564 |
| *CCNG2* |  | GC04P077158 |
| *SOX30* |  | GC05M157624 |
| *STARD3NL* |  | GC07P038218 |
| *SCYL2* |  | GC12P100267 |
| *CABP2* |  | GC11M067536 |
| *TMEM260* |  | GC14P056488 |
| *EIF2D* |  | GC01M206571 |
| *SAMD14* |  | GC17M050110 |
| *H1-2* |  | GC06M026056 |
| *MT-ND1* |  | GCMTP003309 |
| *HDGFL3* |  | GC15M083116 |
| *TSPO2* |  | GC06P041041 |
| *FAM215A* |  | GC17P043917 |
| *IGLV6-57* |  | GC22P022195 |
| *MIR622* |  | GC13P090231 |
| *TRBV23-1* |  | GC07P144934 |
| *TRBV21-1* |  | GC07P144932 |
| *EIF2AK2* |  | GC02M037099 |
| *ZHX2* |  | GC08P122781 |
| *RFC1* |  | GC04M039291 |
| *MAPK7* |  | GC17P019379 |
| *KCNN4* |  | GC19M043767 |
| *GSS* |  | GC20M034928 |
| *ILK* |  | GC11P006581 |
| *WNT3* |  | GC17M046762 |
| *ADORA2A* |  | GC22P024417 |
| *MYH2* |  | GC17M010521 |
| *TRPM4* |  | GC19P049157 |
| *ITPR2* |  | GC12M026336 |
| *LOX* |  | GC05M122063 |
| *MST1* |  | GC03M049683 |
| *RTN4* |  | GC02M054934 |
| *SNAI2* |  | GC08M048854 |
| *PVR* |  | GC19P044644 |
| *MAP3K4* |  | GC06P160991 |
| *MGST1* |  | GC12P016347 |
| *FABP7* |  | GC06P122779 |
| *CHI3L1* |  | GC01M203148 |
| *MMP24* |  | GC20P035226 |
| *TPSAB1* |  | GC16P001240 |
| *SAMHD1* |  | GC20M036890 |
| *EEF1D* |  | GC08M143579 |
| *ADCYAP1* |  | GC18P000895 |
| *GCNT1* |  | GC09P076420 |
| *ATP6AP1* |  | GC0XP154428 |
| *PCNT* |  | GC21P046324 |
| *S100A11* |  | GC01M152032 |
| *SLC22A8* |  | GC11M063463 |
| *MARCO* |  | GC02P118942 |
| *PIGB* |  | GC15P055318 |
| *CD109* |  | GC06P073695 |
| *HOXA3* |  | GC07M027107 |
| *SERPINI2* |  | GC03M167441 |
| *RRAD* |  | GC16M066925 |
| *IMMP2L* |  | GC07M110663 |
| *KCNIP4* |  | GC04M020728 |
| *WTAP* |  | GC06P159725 |
| *GRHL3* |  | GC01P024319 |
| *TNIP2* |  | GC04M002741 |
| *USH2A* |  | GC01M215622 |
| *TIGAR* |  | GC12P008104 |
| *FMNL1* |  | GC17P045222 |
| *CDK11B* |  | GC01M001738 |
| *CCDC50* |  | GC03P191329 |
| *SLC22A16* |  | GC06M110424 |
| *PGP* |  | GC16M002365 |
| *EPYC* |  | GC12M090963 |
| *TRIM65* |  | GC17M075880 |
| *KLHL14* |  | GC18M032672 |
| *ITFG1* |  | GC16M047156 |
| *PLEKHO1* |  | GC01P150121 |
| *RAD51AP1* |  | GC12P008105 |
| *FCGR2C* |  | GC01P161551 |
| *PGAM5* |  | GC12P132710 |
| *FOXQ1* |  | GC06P001312 |
| *ELOF1* |  | GC19M011551 |
| *WDR76* |  | GC15P043826 |
| *PCDHGA3* |  | GC05P143052 |
| *H1-3* |  | GC06M027296 |
| *SEPTIN4* |  | GC17M058522 |
| *MIR212* |  | GC17M002050 |
| *MIR133A2* |  | GC20P062896 |
| *MIR374B* |  | GC0XM074227 |
| *IGHV4-4* |  | GC14M106011 |
| *BRAFP1* |  | GC0XP075582 |
| *MIR10392* |  | GC11M064881 |
| *MIR10396A* |  | GC21P009010 |
| *MIR10398* |  | GC06M042423 |
| *MIR10399* |  | GC07M139046 |
| *MIR10393* |  | GC15P044718 |
| *MIR10394* |  | GC19P058396 |
| *MIR10396B* |  | GC21P008758 |
| *MIR10397* |  | GC05P010403 |
| *MIR10400* |  | GC08M144466 |
| *MIR10395* |  | GC19U902503 |
| *MIR10401* |  | GC21U900943 |
| *ARHGEF2* |  | GC01M155946 |
| *ARNT* |  | GC01M150809 |
| *PRKCA* |  | GC17P066302 |
| *BTRC* |  | GC10P101354 |
| *IKBKE* |  | GC01P206470 |
| *ATP1B2* |  | GC17P008047 |
| *TPP2* |  | GC13P102596 |
| *PPIB* |  | GC15M064155 |
| *SNAP25* |  | GC20P010218 |
| *FGG* |  | GC04M154604 |
| *CPT1A* |  | GC11M068754 |
| *PLCB1* |  | GC20P008061 |
| *AKR1B1* |  | GC07M134442 |
| *GATA6* |  | GC18P022169 |
| *ATP1A2* |  | GC01P160115 |
| *BUB3* |  | GC10P123154 |
| *PPP2R1B* |  | GC11M111695 |
| *PARP2* |  | GC14P020343 |
| *CAMKK2* |  | GC12M121309 |
| *MIB1* |  | GC18P021704 |
| *FDPS* |  | GC01P155308 |
| *CFH* |  | GC01P196621 |
| *IFNAR1* |  | GC21P033324 |
| *PPP1CB* |  | GC02P028752 |
| *SAT1* |  | GC0XP023784 |
| *SIK2* |  | GC11P111605 |
| *KCNA5* |  | GC12P005043 |
| *APOA5* |  | GC11M116789 |
| *FLNC* |  | GC07P128830 |
| *HGS* |  | GC17P081683 |
| *NDUFS4* |  | GC05P053560 |
| *SLC22A3* |  | GC06P160348 |
| *C3AR1* |  | GC12M008058 |
| *LRPAP1* |  | GC04M003508 |
| *CUX1* |  | GC07P101815 |
| *CXADR* |  | GC21P017512 |
| *NFE2L1* |  | GC17P048049 |
| *PLSCR1* |  | GC03M146515 |
| *INPP5A* |  | GC10P132537 |
| *TFAM* |  | GC10P058385 |
| *COMMD1* |  | GC02P061888 |
| *MLST8* |  | GC16P002204 |
| *RAPGEF1* |  | GC09M131576 |
| *LGMN* |  | GC14M092703 |
| *AIM2* |  | GC01M159062 |
| *GSTM2* |  | GC01P109668 |
| *HIP1R* |  | GC12P122834 |
| *EIF3A* |  | GC10M119034 |
| *CREM* |  | GC10P035126 |
| *SLC14A2* |  | GC18P045212 |
| *PIGR* |  | GC01M206928 |
| *TFPI2* |  | GC07M093885 |
| *THBS3* |  | GC01M155195 |
| *B3GNT3* |  | GC19P017794 |
| *FAT4* |  | GC04P125315 |
| *BNIP2* |  | GC15M059659 |
| *HDGF* |  | GC01M156754 |
| *CFHR5* |  | GC01P196977 |
| *CCL28* |  | GC05M043356 |
| *CD300A* |  | GC17P074466 |
| *DEGS1* |  | GC01P224175 |
| *SH3BP5* |  | GC03M015805 |
| *LIMD1* |  | GC03P045555 |
| *HSPA1B* |  | GC06P047325 |
| *USP18* |  | GC22P018149 |
| *BAG5* |  | GC14M103556 |
| *AIF1* |  | GC06P047304 |
| *AIFM2* |  | GC10M070098 |
| *BTF3* |  | GC05P073498 |
| *RIF1* |  | GC02P151409 |
| *ECSIT* |  | GC19M011505 |
| *SLC24A3* |  | GC20P019212 |
| *NUCB1* |  | GC19P048900 |
| *KRT81* |  | GC12M052286 |
| *XCR1* |  | GC03M046016 |
| *LMO3* |  | GC12M016548 |
| *HMGN2* |  | GC01P026473 |
| *DAP* |  | GC05M010679 |
| *SGTA* |  | GC19M002754 |
| *LAPTM5* |  | GC01M030732 |
| *USP34* |  | GC02M061187 |
| *MIB2* |  | GC01P001614 |
| *MAFK* |  | GC07P001531 |
| *DPYSL5* |  | GC02P026847 |
| *DPH5* |  | GC01M100989 |
| *DPP8* |  | GC15M065442 |
| *SLC7A4* |  | GC22M021028 |
| *TUBGCP3* |  | GC13M112485 |
| *PLA2G4D* |  | GC15M042067 |
| *LRRN1* |  | GC03P003799 |
| *C1QTNF7* |  | GC04P015339 |
| *CSNK1A1L* |  | GC13M037103 |
| *SLC13A1* |  | GC07M123113 |
| *LAD1* |  | GC01M201373 |
| *TRIM13* |  | GC13P049995 |
| *PARD3B* |  | GC02P204545 |
| *ONECUT2* |  | GC18P057436 |
| *KLRC3* |  | GC12M013868 |
| *JAKMIP2* |  | GC05M147585 |
| *SPDYA* |  | GC02P028782 |
| *TP53I11* |  | GC11M044881 |
| *RFTN1* |  | GC03M016357 |
| *PPARGC1B* |  | GC05P149730 |
| *ARSH* |  | GC0XP003006 |
| *TM4SF4* |  | GC03P149473 |
| *FBXL15* |  | GC10P102419 |
| *MAGEB4* |  | GC0XP030241 |
| *ADGRG7* |  | GC03P100609 |
| *MLIP* |  | GC06P053929 |
| *DPH7* |  | GC09M137554 |
| *SOX12* |  | GC20P000325 |
| *UQCC1* |  | GC20M035302 |
| *WDR17* |  | GC04P176065 |
| *EMC3* |  | GC03M009967 |
| *CFAP69* |  | GC07P090245 |
| *MRPL58* |  | GC17P075014 |
| *NTN3* |  | GC16P002471 |
| *CCDC186* |  | GC10M114120 |
| *C12orf42* |  | GC12M103079 |
| *CYBC1* |  | GC17M082443 |
| *WDCP* |  | GC02M024032 |
| *SMAD5-AS1* |  | GC05M136129 |
| *MIR9-3* |  | GC15P089363 |
| *MIR9-2* |  | GC05M088666 |
| *SNORD22* |  | GC11M063449 |
| *SNHG3* |  | GC01P028506 |
| *DLEU2L* |  | GC01P063547 |
| *MIR18B* |  | GC0XM134218 |
| *FIRRE* |  | GC0XM131702 |
| *MIR506* |  | GC0XM147230 |
| *SNORD50A* |  | GC06M085677 |
| *MIR1234* |  | GC08M144401 |
| *MIR320D2* |  | GC0XM140926 |
| *MANCR* |  | GC10M004650 |
| *MIR3662* |  | GC06M134979 |
| *SNORD50B* |  | GC06M085686 |
| *MIR4422HG* |  | GC01P055220 |
| *CHEK2P2* |  | GC15P020282 |
| *TRAJ6* |  | GC14P025261 |
| *CD44-AS1* |  | GC11M035210 |
| *SPON1-AS1* |  | GC11M014263 |
| *LILRB1-AS1* |  | GC19M054636 |
| *LINC02238* |  | GC01P073636 |
| *XIC* |  | GC0XU990235 |
| *B2MR* |  | GC15U990004 |
| *MNS16A* |  | GC05P001260 |
| *EPHA3* |  | GC03P089077 |
| *PLAUR* |  | GC19M043646 |
| *USF1* |  | GC01M161039 |
| *RPLP0* |  | GC12M120196 |
| *EEF1G* |  | GC11M063390 |
| *CDC5L* |  | GC06P044387 |
| *HNRNPH2* |  | GC0XP101408 |
| *GPHA2* |  | GC11M065023 |
| *VWF* |  | GC12M005917 |
| *TNXB* |  | GC06M032635 |
| *PRDX3* |  | GC10M119167 |
| *ACP3* |  | GC03P132319 |
| *CCNK* |  | GC14P099483 |
| *PTTG1* |  | GC05P160422 |
| *MLLT1* |  | GC19M006210 |
| *DDR2* |  | GC01P162631 |
| *GLRX3* |  | GC10P130136 |
| *LAG3* |  | GC12P008203 |
| *VAV2* |  | GC09M133761 |
| *IGF2BP1* |  | GC17P048997 |
| *SCD* |  | GC10P100347 |
| *UBA1* |  | GC0XP047190 |
| *LRPPRC* |  | GC02M043850 |
| *EEF1B2* |  | GC02P206159 |
| *HMGB2* |  | GC04M173331 |
| *SLC31A1* |  | GC09P113221 |
| *EDAR* |  | GC02M108894 |
| *ACIN1* |  | GC14M023058 |
| *BST2* |  | GC19M017403 |
| *BANK1* |  | GC04P101411 |
| *DLGAP5* |  | GC14M055148 |
| *SLC39A2* |  | GC14P021254 |
| *FOXR1* |  | GC11P118971 |
| *ZDHHC11* |  | GC05M000795 |
| *H3-3A* |  | GC01P226062 |
| *FAM160A1* |  | GC04P151409 |
| *ZDHHC11B* |  | GC05M000710 |
| *MIR520C* |  | GC19P054624 |
| *HDAC4* |  | GC02M239048 |
| *HAX1* |  | GC01P154273 |
| *CD160* |  | GC01P145719 |
| *PDE5A* |  | GC04M119494 |
| *CHD2* |  | GC15P092900 |
| *DRAM2* |  | GC01M111117 |
| *PPEF1* |  | GC0XP018676 |
| *TM9SF2* |  | GC13P099446 |
| *SEPTIN2* |  | GC02P241316 |
| *LEPQTL1* |  | GC02U903086 |
| *NR4A3* |  | GC09P099821 |
| *RDX* |  | GC11M109864 |
| *GFAP* |  | GC17M044905 |
| *F5* |  | GC01M169511 |
| *EZR* |  | GC06M158765 |
| *HIP1* |  | GC07M075533 |
| *AVEN* |  | GC15M033853 |
| *IRS2* |  | GC13M109752 |
| *TFPT* |  | GC19M054107 |
| *SIX1* |  | GC14M060643 |
| *EGLN2* |  | GC19P040799 |
| *MAP4K1* |  | GC19M038587 |
| *SLC28A1* |  | GC15P084884 |
| *KDM4B* |  | GC19P004969 |
| *HDAC11* |  | GC03P013478 |
| *RGMA* |  | GC15M093035 |
| *SUMO2* |  | GC17M075165 |
| *GCC2* |  | GC02P108432 |
| *PYGO2* |  | GC01M154957 |
| *KDM4D* |  | GC11P094973 |
| *ZBTB33* |  | GC0XP120250 |
| *CMIP* |  | GC16P081445 |
| *CYTOR* |  | GC02P087460 |
| *F10* |  | GC13P113122 |
| *IL1R2* |  | GC02P101991 |
| *CCNA1* |  | GC13P036431 |
| *STRN* |  | GC02M036815 |
| *ENO3* |  | GC17P004948 |
| *HDAC5* |  | GC17M044076 |
| *POLB* |  | GC08P042338 |
| *HUWE1* |  | GC0XM053532 |
| *USP7* |  | GC16M008892 |
| *ARHGEF7* |  | GC13P111114 |
| *RBCK1* |  | GC20P000407 |
| *PSIP1* |  | GC09M015456 |
| *BAP1* |  | GC03M052401 |
| *MAP4K4* |  | GC02P101773 |
| *SIRT6* |  | GC19M004174 |
| *TUBB2A* |  | GC06M003153 |
| *CYP26B1* |  | GC02M072129 |
| *SLC22A6* |  | GC11M063458 |
| *DCXR* |  | GC17M082036 |
| *SLK* |  | GC10P103967 |
| *LTC4S* |  | GC05P179793 |
| *PLEC* |  | GC08M143916 |
| *ALMS1* |  | GC02P073385 |
| *GSTM4* |  | GC01P109657 |
| *TNK1* |  | GC17P007380 |
| *HOXB9* |  | GC17M048621 |
| *PDIA6* |  | GC02M010774 |
| *ELP3* |  | GC08P028089 |
| *SIGLEC7* |  | GC19P051142 |
| *SENP8* |  | GC15P072938 |
| *PYGO1* |  | GC15M055538 |
| *GOLGA4* |  | GC03P037243 |
| *EPPK1* |  | GC08M143857 |
| *TASOR* |  | GC03M056620 |
| *CASC2* |  | GC10P118046 |
| *LY75-CD302* |  | GC02M159768 |
| *MIR24-2* |  | GC19M014008 |
| *MIR519D* |  | GC19P053713 |
| *MIR650* |  | GC22P022822 |
| *CEACAM8* |  | GC19M042580 |
| *PPP1R15A* |  | GC19P048872 |
| *AGT* |  | GC01M230702 |
| *C1QBP* |  | GC17M005432 |
| *DUT* |  | GC15P048331 |
| *IRS4* |  | GC0XM108720 |
| *DPYD* |  | GC01M097015 |
| *PHB* |  | GC17M049404 |
| *PIGA* |  | GC0XM015319 |
| *ABCB7* |  | GC0XM075053 |
| *NDRG2* |  | GC14M021016 |
| *EHMT2* |  | GC06M031879 |
| *SERPINF2* |  | GC17P001742 |
| *NCR1* |  | GC19P054906 |
| *PTGER2* |  | GC14P052314 |
| *PTGER1* |  | GC19M014444 |
| *DHX9* |  | GC01P182839 |
| *SERPINA7* |  | GC0XM106032 |
| *LAT2* |  | GC07P074199 |
| *IGFBP7* |  | GC04M057030 |
| *HLA-DRB4* |  | GC06Mo03851 |
| *DUX4* |  | GC04P190173 |
| *ISG15* |  | GC01P001001 |
| *DCTD* |  | GC04M182890 |
| *SRGN* |  | GC10P069088 |
| *YAP1* |  | GC11P102110 |
| *PAX2* |  | GC10P100735 |
| *CD226* |  | GC18M069831 |
| *PSMC6* |  | GC14P052707 |
| *MIR618* |  | GC12M080935 |
| *UBB* |  | GC17P016380 |
| *ARHGDIA* |  | GC17M081867 |
| *HSPA9* |  | GC05M138554 |
| *FKBP1A* |  | GC20M001369 |
| *VTN* |  | GC17M029955 |
| *CD82* |  | GC11P044586 |
| *GNA15* |  | GC19P003154 |
| *DNASE1* |  | GC16P003611 |
| *GNL3* |  | GC03P052681 |
| *NTAN1* |  | GC16M015037 |
| *IFNA17* |  | GC09M021227 |
| *SIRT2* |  | GC19M038878 |
| *KAT5* |  | GC11P065711 |
| *AIP* |  | GC11P067468 |
| *TFPI* |  | GC02M187464 |
| *RXRG* |  | GC01M165401 |
| *MCM3AP* |  | GC21M046235 |
| *MERTK* |  | GC02P111898 |
| *F9* |  | GC0XP139530 |
| *F8* |  | GC0XM154835 |
| *RPL10* |  | GC0XP154389 |
| *IGLL1* |  | GC22M023573 |
| *UMOD* |  | GC16M020344 |
| *HOXB4* |  | GC17M048575 |
| *DKK3* |  | GC11M011962 |
| *ACAN* |  | GC15P088813 |
| *TMPRSS15* |  | GC21M018269 |
| *MRTFA* |  | GC22M045655 |
| *MYDGF* |  | GC19M004641 |
| *NKX2-5* |  | GC05M173232 |
| *ANKS1B* |  | GC12M098726 |
| *SQSTM1* |  | GC05P179806 |
| *CST3* |  | GC20M023608 |
| *HMBS* |  | GC11P119084 |
| *ELK1* |  | GC0XM047635 |
| *PHOX2B* |  | GC04M041746 |
| *HNRNPU* |  | GC01M244844 |
| *TP53BP2* |  | GC01M223779 |
| *DOK2* |  | GC08M021908 |
| *CAMLG* |  | GC05P134738 |
| *LDOC1* |  | GC0XM141111 |
| *MIR2909* |  | GC17P037033 |
| *SERPINB5* |  | GC18P063476 |
| *ST3GAL4* |  | GC11P126355 |
| *IFNAR2* |  | GC21P033229 |
| *EPCAM* |  | GC02P047345 |
| *PIN1* |  | GC19P009835 |
| *WNT3A* |  | GC01P228127 |
| *IL11RA* |  | GC09P034650 |
| *IGF2BP2* |  | GC03M185643 |
| *RPL22* |  | GC01M006179 |
| *FOXC1* |  | GC06P001610 |
| *FCAR* |  | GC19P055445 |
| *MLXIPL* |  | GC07M073593 |
| *MAPK8IP3* |  | GC16P001706 |
| *PKNOX1* |  | GC21P042974 |
| *CD53* |  | GC01P110871 |
| *TNFRSF10C* |  | GC08P023102 |
| *C1D* |  | GC02M068041 |
| *ZFR* |  | GC05M032390 |
| *TXLNA* |  | GC01P032179 |
| *UBAP2L* |  | GC01P154219 |
| *MIR93* |  | GC07M100282 |
| *PRKAR1A* |  | GC17P068414 |
| *PRKG1* |  | GC10P050991 |
| *FASN* |  | GC17M082078 |
| *FPR1* |  | GC19M051745 |
| *CYP2A6* |  | GC19M040843 |
| *PRKAA1* |  | GC05M040759 |
| *SOX9* |  | GC17P072121 |
| *TFAP2A* |  | GC06M010393 |
| *PRDX5* |  | GC11P064317 |
| *EZH1* |  | GC17M042700 |
| *ERN1* |  | GC17M064039 |
| *VIPR1* |  | GC03P042490 |
| *LPAR2* |  | GC19M019624 |
| *EPHB6* |  | GC07P144968 |
| *MAP1LC3A* |  | GC20P034546 |
| *SMARCAL1* |  | GC02P216412 |
| *IQGAP1* |  | GC15P090388 |
| *TRHR* |  | GC08P109084 |
| *CYFIP1* |  | GC15M022867 |
| *HNRNPF* |  | GC10M043385 |
| *RCOR1* |  | GC14P102592 |
| *MSI1* |  | GC12M120341 |
| *OTUD4* |  | GC04M145110 |
| *ZNF281* |  | GC01M200404 |
| *CCAR2* |  | GC08P022604 |
| *FBXO25* |  | GC08P000406 |
| *FUBP3* |  | GC09P130580 |
| *TSPAN4* |  | GC11P000894 |
| *GPATCH4* |  | GC01M156565 |
| *SUGP2* |  | GC19M018990 |
| *ZNF326* |  | GC01P089995 |
| *ZNF512* |  | GC02P027582 |
| *QSER1* |  | GC11P032892 |
| *GSK3A* |  | GC19M042230 |
| *CFHR3* |  | GC01P196774 |
| *CKAP4* |  | GC12M106237 |
| *TBXT* |  | GC06M166158 |
| *COL1A1* |  | GC17M050183 |
| *DNM2* |  | GC19P010718 |
| *PTGER3* |  | GC01M070852 |
| *ARRB1* |  | GC11M075261 |
| *PAX4* |  | GC07M127610 |
| *SMARCC1* |  | GC03M047585 |
| *MCF2L* |  | GC13P112894 |
| *UBE2V1* |  | GC20M050082 |
| *HOXA5* |  | GC07M027142 |
| *AKAP8* |  | GC19M015354 |
| *MCAM* |  | GC11M119308 |
| *SYNCRIP* |  | GC06M085607 |
| *LOC106865369* | | GC11P003731 |
| *MAPT* |  | GC17P045894 |
| *CSPG4* |  | GC15M075674 |
| *UBE2V2* |  | GC08P047998 |
| *BAALC* |  | GC08P103141 |
| *EIF2AK3* |  | GC02M088637 |
| *PPIA* |  | GC07P044807 |
| *GALNS* |  | GC16M088813 |
| *INHA* |  | GC02P219569 |
| *SNCG* |  | GC10P086957 |
| *MIR202* |  | GC10M133247 |
| *CTSB* |  | GC08M011842 |
| *ITGA2B* |  | GC17M044388 |
| *MAP2K3* |  | GC17P026749 |
| *GATA4* |  | GC08P011676 |
| *CYP2C8* |  | GC10M095038 |
| *POR* |  | GC07P075899 |
| *YWHAB* |  | GC20P044885 |
| *MAP2K6* |  | GC17P069414 |
| *ACTA1* |  | GC01M229431 |
| *JUP* |  | GC17M041754 |
| *VCL* |  | GC10P073995 |
| *MSR1* |  | GC08M016107 |
| *NRG1* |  | GC08P031639 |
| *SUMO1* |  | GC02M202206 |
| *PPARGC1A* |  | GC04M023755 |
| *PAK2* |  | GC03P196739 |
| *FKBP5* |  | GC06M042217 |
| *DPAGT1* |  | GC11M119096 |
| *RAN* |  | GC12P130871 |
| *TCF7L2* |  | GC10P112950 |
| *ITGA2* |  | GC05P052989 |
| *ANK3* |  | GC10M060026 |
| *MED12* |  | GC0XP071118 |
| *GAB1* |  | GC04P143336 |
| *CLIP1* |  | GC12M122271 |
| *SNAI1* |  | GC20P049982 |
| *GDI1* |  | GC0XP154436 |
| *NFATC3* |  | GC16P068119 |
| *SMYD2* |  | GC01P214281 |
| *NTF3* |  | GC12P005432 |
| *NSD1* |  | GC05P177134 |
| *SPTBN1* |  | GC02P054456 |
| *TRIB3* |  | GC20P000361 |
| *NAGLU* |  | GC17P042535 |
| *ETS2* |  | GC21P038805 |
| *HBG2* |  | GC11M005372 |
| *SLC3A2* |  | GC11P062856 |
| *MED23* |  | GC06M131573 |
| *RASGRF1* |  | GC15M078959 |
| *RANGAP1* |  | GC22M041244 |
| *HLX* |  | GC01P220879 |
| *DAPP1* |  | GC04P099816 |
| *ADAM28* |  | GC08P024294 |
| *OSBPL1A* |  | GC18M024162 |
| *EIF4ENIF1* |  | GC22M031436 |
| *SEC62* |  | GC03P169966 |
| *NFKBIZ* |  | GC03P101827 |
| *LAMTOR5* |  | GC01M110401 |
| *NKRF* |  | GC0XM119588 |
| *PDF* |  | GC16M069563 |
| *IFNA4* |  | GC09M021186 |
| *CARMIL2* |  | GC16P067644 |
| *MIR26A2* |  | GC12M057824 |
| *MIR4474* |  | GC09M020505 |
| *PIKFYVE* |  | GC02P208266 |
| *LAT* |  | GC16P029115 |
| *RALBP1* |  | GC18P009465 |
| *NKX2-2* |  | GC20M021511 |
| *TNFSF18* |  | GC01M173009 |
| *CBX7* |  | GC22M045393 |
| *BHLHA15* |  | GC07P098211 |
| *PCGF1* |  | GC02M074505 |
| *TRAT1* |  | GC03P108823 |
| *LOC102723407* | | GC14P8B0041 |
| *DDC* |  | GC07M050458 |
| *CAPN2* |  | GC01P223701 |
| *FANCC* |  | GC09M095099 |
| *CDH5* |  | GC16P066366 |
| *FANCG* |  | GC09M035073 |
| *GTF2B* |  | GC01M088853 |
| *ADAMTSL1* |  | GC09P017906 |
| *KHDRBS1* |  | GC01P031981 |
| *RNASE1* |  | GC14M020801 |
| *FAT1* |  | GC04M186587 |
| *RASSF6* |  | GC04M073571 |
| *RASSF10* |  | GC11P012990 |
| *PRKACA* |  | GC19M014092 |
| *CDH2* |  | GC18M027950 |
| *PRKD1* |  | GC14M029576 |
| *CAMK2A* |  | GC05M150219 |
| *MAPK13* |  | GC06P047452 |
| *APOA1* |  | GC11M116835 |
| *RAB7A* |  | GC03P128749 |
| *ADAM9* |  | GC08P038996 |
| *CSNK1E* |  | GC22M045469 |
| *NOG* |  | GC17P056593 |
| *PTGDR* |  | GC14P052267 |
| *KAT2A* |  | GC17M042113 |
| *CDK8* |  | GC13P026254 |
| *USP15* |  | GC12P062260 |
| *RRAS2* |  | GC11M014299 |
| *PRPS1* |  | GC0XP107628 |
| *EPB41* |  | GC01P028887 |
| *MC4R* |  | GC18M060371 |
| *ACHE* |  | GC07M100889 |
| *EMD* |  | GC0XP154379 |
| *SDC2* |  | GC08P096494 |
| *OAS1* |  | GC12P112906 |
| *TRIO* |  | GC05P014143 |
| *RAC3* |  | GC17P082031 |
| *ATP2A3* |  | GC17M003923 |
| *CTSG* |  | GC14M024573 |
| *GANAB* |  | GC11M063430 |
| *HMGA2* |  | GC12P065824 |
| *DDIT4* |  | GC10P072273 |
| *SDC4* |  | GC20M045325 |
| *HSPA6* |  | GC01P161524 |
| *WDR5* |  | GC09P134135 |
| *MAP1B* |  | GC05P072107 |
| *HSF2* |  | GC06P122399 |
| *SLC2A5* |  | GC01M009036 |
| *PTPN14* |  | GC01M214348 |
| *SP3* |  | GC02M173882 |
| *ITIH4* |  | GC03M052812 |
| *GPLD1* |  | GC06M024425 |
| *LAIR1* |  | GC19M054351 |
| *TES* |  | GC07P116210 |
| *CUL4A* |  | GC13P113208 |
| *WWTR1* |  | GC03M149517 |
| *HOXB7* |  | GC17M048607 |
| *DIO2* |  | GC14M080197 |
| *GPR132* |  | GC14M105049 |
| *NFE2* |  | GC12M054292 |
| *SMCHD1* |  | GC18P002649 |
| *RAE1* |  | GC20P057351 |
| *USP11* |  | GC0XP047232 |
| *AZU1* |  | GC19P000825 |
| *CCT6A* |  | GC07P056051 |
| *HNRNPM* |  | GC19P008444 |
| *RPL14* |  | GC03P040458 |
| *ORMDL3* |  | GC17M039921 |
| *KIR2DL4* |  | GC19P055441 |
| *MYCBP2* |  | GC13M077044 |
| *WDR77* |  | GC01M111439 |
| *SAFB* |  | GC19P005623 |
| *ILF2* |  | GC01M153661 |
| *ADPRH* |  | GC03P119579 |
| *PMEL* |  | GC12M055954 |
| *RBM39* |  | GC20M035703 |
| *LBX1* |  | GC10M101226 |
| *HSPA4L* |  | GC04P127781 |
| *G3BP2* |  | GC04M075642 |
| *CNTNAP4* |  | GC16P076278 |
| *DHX32* |  | GC10M125836 |
| *ZMYM4* |  | GC01P035268 |
| *DHX33* |  | GC17M005440 |
| *WDR6* |  | GC03P049007 |
| *FRYL* |  | GC04M048499 |
| *LOC108251801* | | GC07P127618 |
| *LOC106865368* | | GC11P108673 |
| *MMP13* |  | GC11M102942 |
| *MAP3K1* |  | GC05P056815 |
| *PSAT1* |  | GC09P078297 |
| *OPRM1* |  | GC06P154075 |
| *SPTLC2* |  | GC14M077505 |
| *DNM1L* |  | GC12P032679 |
| *TNFRSF11B* |  | GC08M118923 |
| *F2R* |  | GC05P076716 |
| *CD151* |  | GC11P000895 |
| *SLC34A2* |  | GC04P025657 |
| *OPRK1* |  | GC08M053227 |
| *ARRB2* |  | GC17P004711 |
| *TLE1* |  | GC09M081583 |
| *AMFR* |  | GC16M056361 |
| *SMURF2* |  | GC17M064542 |
| *KIF22* |  | GC16P029802 |
| *WWP2* |  | GC16P069796 |
| *ARNTL* |  | GC11P013276 |
| *MAP2* |  | GC02P209424 |
| *NDUFAF4* |  | GC06M096889 |
| *CCNO* |  | GC05M055231 |
| *RNF8* |  | GC06P047472 |
| *PF4* |  | GC04M073980 |
| *TWIST2* |  | GC02P238848 |
| *SOCS5* |  | GC02P046698 |
| *AMOT* |  | GC0XM112774 |
| *MCC* |  | GC05M113022 |
| *FKBP3* |  | GC14M045115 |
| *NTS* |  | GC12P085876 |
| *ZNF148* |  | GC03M125225 |
| *FRAS1* |  | GC04P078056 |
| *OXA1L* |  | GC14P022766 |
| *DHRS9* |  | GC02P169064 |
| *MKRN2* |  | GC03P012561 |
| *MUC2* |  | GC11P001074 |
| *POU2F3* |  | GC11P120236 |
| *SSBP1* |  | GC07P145133 |
| *RASGRF2* |  | GC05P080960 |
| *ARHGAP35* |  | GC19P046860 |
| *DPY30* |  | GC02M031867 |
| *MXD1* |  | GC02P069897 |
| *CSMD1* |  | GC08M002953 |
| *PCDH9* |  | GC13M066302 |
| *SARM1* |  | GC17P028364 |
| *NKX2-3* |  | GC10P099532 |
| *LCMT2* |  | GC15M043323 |
| *CBX8* |  | GC17M079794 |
| *YAF2* |  | GC12M042157 |
| *BCORL1* |  | GC0XP129980 |
| *RGL4* |  | GC22P023688 |
| *YLPM1* |  | GC14P074763 |
| *MTBP* |  | GC08P120426 |
| *ELOB* |  | GC16M002772 |
| *ZC3H18* |  | GC16P088570 |
| *EMSY* |  | GC11P076445 |
| *H3C14* |  | GC01M149963 |
| *H2BS1* |  | GC21P043567 |
| *MIR218-1* |  | GC04P020677 |
| *BMP4* |  | GC14M053949 |
| *EXT1* |  | GC08M117798 |
| *PAH* |  | GC12M102836 |
| *TAB2* |  | GC06P149218 |
| *DUSP1* |  | GC05M172768 |
| *ARID1B* |  | GC06P156777 |
| *ENPP3* |  | GC06P131617 |
| *LY96* |  | GC08P073991 |
| *PNPT1* |  | GC02M055634 |
| *JAG2* |  | GC14M105140 |
| *ABCA2* |  | GC09M137007 |
| *MSI2* |  | GC17P057255 |
| *PBX3* |  | GC09P125747 |
| *COG2* |  | GC01P230642 |
| *TAX1BP1* |  | GC07P027739 |
| *SFRP5* |  | GC10M097766 |
| *SLCO1A2* |  | GC12M021264 |
| *DHX15* |  | GC04M024519 |
| *GPS1* |  | GC17P082050 |
| *TRIB2* |  | GC02P012706 |
| *LACTB* |  | GC15P073008 |
| *CEACAM4* |  | GC19M042520 |
| *LOC107963948* | | GC22P024883 |
| *LOC106694315* | | GC17P058279 |
| *LOC106992256* | | GC20P041082 |
| *PRKCG* |  | GC19P053879 |
| *BMPR2* |  | GC02P202376 |
| *CASK* |  | GC0XM041514 |
| *MAPKAPK2* |  | GC01P206684 |
| *PPP2CA* |  | GC05M134194 |
| *EGLN1* |  | GC01M231363 |
| *TNNT2* |  | GC01M201359 |
| *POLH* |  | GC06P043576 |
| *CACNA1A* |  | GC19M013206 |
| *PRKACG* |  | GC09M069013 |
| *WNT4* |  | GC01M022190 |
| *HCFC1* |  | GC0XM153947 |
| *PRKAR2A* |  | GC03M048744 |
| *L1CAM* |  | GC0XM153864 |
| *PFKP* |  | GC10P003066 |
| *SAE1* |  | GC19P047114 |
| *PRKD3* |  | GC02M037251 |
| *MARK2* |  | GC11P063838 |
| *AGER* |  | GC06M032180 |
| *ACSL4* |  | GC0XM109624 |
| *RHOB* |  | GC02P020447 |
| *PEBP1* |  | GC12P118135 |
| *RUVBL1* |  | GC03M128064 |
| *PLA2G10* |  | GC16M014672 |
| *HSPB8* |  | GC12P119178 |
| *PIAS1* |  | GC15P068054 |
| *PIP5K1A* |  | GC01P151198 |
| *KNG1* |  | GC03P186717 |
| *STK10* |  | GC05M172042 |
| *WNK4* |  | GC17P043993 |
| *ARNT2* |  | GC15P080404 |
| *MEFV* |  | GC16M003281 |
| *PGAM1* |  | GC10P097426 |
| *NRIP1* |  | GC21M014961 |
| *PDE1A* |  | GC02M182140 |
| *OLA1* |  | GC02M174072 |
| *PTAFR* |  | GC01M028147 |
| *PURA* |  | GC05P140076 |
| *TFE3* |  | GC0XM049028 |
| *VASP* |  | GC19P045507 |
| *ESPL1* |  | GC12P053268 |
| *ABCB5* |  | GC07P020615 |
| *NTSR1* |  | GC20P062708 |
| *F2RL2* |  | GC05M076615 |
| *MEOX2* |  | GC07M015617 |
| *CDK13* |  | GC07P040020 |
| *RHOC* |  | GC01M112701 |
| *DDX20* |  | GC01P111755 |
| *GRP* |  | GC18P059220 |
| *HSF4* |  | GC16P067164 |
| *KLK11* |  | GC19M051023 |
| *TKTL1* |  | GC0XP154295 |
| *PCSK2* |  | GC20P017226 |
| *TRIM27* |  | GC06M028903 |
| *ADD2* |  | GC02M070626 |
| *GDI2* |  | GC10M005765 |
| *LPAR4* |  | GC0XP078747 |
| *FDX1* |  | GC11P110429 |
| *RGS6* |  | GC14P071867 |
| *DNAJB11* |  | GC03P186567 |
| *NAB2* |  | GC12P057088 |
| *EML1* |  | GC14P099737 |
| *SH2D2A* |  | GC01M156776 |
| *IDI2* |  | GC10M001018 |
| *SPTB* |  | GC14M064746 |
| *TRIM63* |  | GC01M026062 |
| *KDM2A* |  | GC11P067119 |
| *SH3BP2* |  | GC04P002794 |
| *FXR2* |  | GC17M007592 |
| *ARHGDIG* |  | GC16P001385 |
| *LSM1* |  | GC08M038163 |
| *CNOT6* |  | GC05P180494 |
| *DNAH9* |  | GC17P011598 |
| *MYOZ2* |  | GC04P119135 |
| *ILDR1* |  | GC03M121987 |
| *KIF13B* |  | GC08M029067 |
| *KMT2B* |  | GC19P038227 |
| *MUC5AC* |  | GC11P001151 |
| *IFI30* |  | GC19P018173 |
| *DDX21* |  | GC10P068956 |
| *WDR35* |  | GC02M019910 |
| *ACAP2* |  | GC03M195274 |
| *CPEB4* |  | GC05P173888 |
| *IFNA5* |  | GC09M021304 |
| *PARP12* |  | GC07M140023 |
| *WDR59* |  | GC16M074871 |
| *UTP6* |  | GC17M031860 |
| *DIMT1* |  | GC05M062387 |
| *IFNA6* |  | GC09M021349 |
| *ORM2* |  | GC09P114329 |
| *SENP7* |  | GC03M101324 |
| *KCNK18* |  | GC10P117197 |
| *HELZ2* |  | GC20M063558 |
| *MRPL37* |  | GC01P054185 |
| *MRPL4* |  | GC19P010251 |
| *SERBP1* |  | GC01M067407 |
| *IFNA21* |  | GC09M021165 |
| *IFNA13* |  | GC09M021367 |
| *PLPP3* |  | GC01M056495 |
| *TRAF3IP3* |  | GC01P209756 |
| *EML2* |  | GC19M045606 |
| *IFNLR1* |  | GC01M024155 |
| *ZMAT3* |  | GC03M179017 |
| *AFDN* |  | GC06P167827 |
| *IFNA8* |  | GC09P021409 |
| *IFNA10* |  | GC09M021373 |
| *IFNA7* |  | GC09M021372 |
| *TM2D3* |  | GC15M101621 |
| *IFNA14* |  | GC09M021239 |
| *ZNF443* |  | GC19M012401 |
| *PANX3* |  | GC11P124611 |
| *XAGE1A* |  | GC0XP052496 |
| *IGLV1-51* |  | GC22P022322 |
| *MIR29B2CHG* |  | GC01M207761 |
| *MIR4463* |  | GC06P075428 |
| *IGKV1D-33* |  | GC02P090483 |
| *IGHV6-1* |  | GC14M105939 |
| *MIR1206* |  | GC08P128008 |
| *LOC117600004* | | GC09P087724 |
| *LOC108449888* | | GC22U901439 |
| *LOC108449897* | | GC11U902939 |
| *ATP2A2* |  | GC12P110280 |
| *MAOA* |  | GC0XP043654 |
| *PTH1R* |  | GC03P046877 |
| *GLUL* |  | GC01M182350 |
| *P4HB* |  | GC17M081843 |
| *HSD11B1* |  | GC01P209686 |
| *YWHAG* |  | GC07M076327 |
| *ALDOA* |  | GC16P030064 |
| *CPT2* |  | GC01P053196 |
| *TUBA1A* |  | GC12M049184 |
| *THRA* |  | GC17P040058 |
| *YES1* |  | GC18M000721 |
| *MAT2A* |  | GC02P085538 |
| *GHSR* |  | GC03M172443 |
| *AQP3* |  | GC09M033431 |
| *AXIN1* |  | GC16M000287 |
| *MEF2A* |  | GC15P099565 |
| *DVL1* |  | GC01M001335 |
| *GPHN* |  | GC14P066507 |
| *SCNN1A* |  | GC12M006346 |
| *RYR2* |  | GC01P237042 |
| *PLK4* |  | GC04P127880 |
| *PINK1* |  | GC01P020634 |
| *RARG* |  | GC12M053210 |
| *YWHAH* |  | GC22P031944 |
| *DCC* |  | GC18P052340 |
| *SFN* |  | GC01P026873 |
| *NR4A2* |  | GC02M156324 |
| *RPS6KB2* |  | GC11P067428 |
| *PLA2G1B* |  | GC12M120322 |
| *EGLN3* |  | GC14M033924 |
| *SYT1* |  | GC12P078863 |
| *AGA* |  | GC04M177430 |
| *FPR2* |  | GC19P051752 |
| *AMACR* |  | GC05M033986 |
| *AMHR2* |  | GC12P053423 |
| *ABCC6* |  | GC16M016148 |
| *ACVR2A* |  | GC02P147844 |
| *GFER* |  | GC16P001984 |
| *HADHA* |  | GC02M026190 |
| *CFL1* |  | GC11M065823 |
| *MVD* |  | GC16M088651 |
| *EEF1A2* |  | GC20M063488 |
| *HRH1* |  | GC03P011113 |
| *PPP2CB* |  | GC08M030762 |
| *SMC3* |  | GC10P110567 |
| *HSD11B2* |  | GC16P067433 |
| *TXK* |  | GC04M048066 |
| *SRPK1* |  | GC06M042223 |
| *ZYX* |  | GC07P143381 |
| *LMAN1* |  | GC18M059327 |
| *CCNB2* |  | GC15P059105 |
| *ANXA4* |  | GC02P069644 |
| *AOC3* |  | GC17P042851 |
| *ARHGAP26* |  | GC05P142770 |
| *ME2* |  | GC18P050879 |
| *CYB5R3* |  | GC22M042617 |
| *CTBP2* |  | GC10M124984 |
| *DPM1* |  | GC20M050934 |
| *GPNMB* |  | GC07P023238 |
| *CDC73* |  | GC01P193121 |
| *EIF2B2* |  | GC14P075002 |
| *NCOA2* |  | GC08M070109 |
| *SMARCC2* |  | GC12M056161 |
| *SEMA4D* |  | GC09M089360 |
| *KIF1B* |  | GC01P010210 |
| *SRPK2* |  | GC07M105110 |
| *PRKAR2B* |  | GC07P107044 |
| *LBP* |  | GC20P038346 |
| *NDUFA13* |  | GC19P019515 |
| *KLF5* |  | GC13P073054 |
| *USP10* |  | GC16P084734 |
| *GFRA2* |  | GC08M021690 |
| *GNG2* |  | GC14P051826 |
| *MAP1LC3B* |  | GC16P087384 |
| *AIMP1* |  | GC04P106315 |
| *FERMT3* |  | GC11P064206 |
| *CRYZ* |  | GC01M074705 |
| *MKNK2* |  | GC19M002037 |
| *DAB2* |  | GC05M039371 |
| *NCK2* |  | GC02P105744 |
| *EIF4A3* |  | GC17M080135 |
| *NET1* |  | GC10P005444 |
| *PRPF3* |  | GC01P150321 |
| *SEC23B* |  | GC20P018507 |
| *PREX1* |  | GC20M048624 |
| *NMT1* |  | GC17P045052 |
| *PLK3* |  | GC01P044799 |
| *NRP2* |  | GC02P205681 |
| *PIAS2* |  | GC18M046808 |
| *TYROBP* |  | GC19M035904 |
| *TTBK2* |  | GC15M042738 |
| *NAGK* |  | GC02P071064 |
| *POSTN* |  | GC13M037562 |
| *STIP1* |  | GC11P064203 |
| *FXR1* |  | GC03P180868 |
| *GNB2* |  | GC07P100673 |
| *BMP3* |  | GC04P081030 |
| *GTF2I* |  | GC07P074658 |
| *DNAJB6* |  | GC07P157335 |
| *MSRA* |  | GC08P010054 |
| *RPL27* |  | GC17P042998 |
| *CPM* |  | GC12M068842 |
| *IGFBP6* |  | GC12P053097 |
| *EMP2* |  | GC16M010541 |
| *PDCD10* |  | GC03M167683 |
| *ARCN1* |  | GC11P118572 |
| *FBXO7* |  | GC22P032474 |
| *AMBP* |  | GC09M114060 |
| *MED1* |  | GC17M039404 |
| *ADAM15* |  | GC01P155023 |
| *BRD7* |  | GC16M050313 |
| *CTNNBIP1* |  | GC01M009848 |
| *CREB3L1* |  | GC11P046299 |
| *CPA4* |  | GC07P130293 |
| *DNAJA1* |  | GC09P033025 |
| *MRPL3* |  | GC03M131462 |
| *MORF4L1* |  | GC15P078810 |
| *DAPK2* |  | GC15M063907 |
| *RNF7* |  | GC03P141738 |
| *RFC4* |  | GC03M186789 |
| *D2HGDH* |  | GC02P241734 |
| *RPL3* |  | GC22M045394 |
| *SIPA1* |  | GC11P065638 |
| *NPEPPS* |  | GC17P047522 |
| *PCBP2* |  | GC12P053452 |
| *SMAD5* |  | GC05P136132 |
| *PLEKHA1* |  | GC10P122374 |
| *SEMA3F* |  | GC03P050167 |
| *IRAK2* |  | GC03P010210 |
| *PIAS3* |  | GC01M145848 |
| *KIF3A* |  | GC05M132689 |
| *USP5* |  | GC12P008202 |
| *GOLGA2* |  | GC09M128255 |
| *APOC1* |  | GC19P044914 |
| *ADAM11* |  | GC17P044759 |
| *GPR183* |  | GC13M099296 |
| *CD6* |  | GC11P060971 |
| *CLCA1* |  | GC01P086468 |
| *CHDH* |  | GC03M053812 |
| *DHX36* |  | GC03M154272 |
| *DPH1* |  | GC17P002030 |
| *NAIP* |  | GC05M070968 |
| *GPM6A* |  | GC04M175632 |
| *CD320* |  | GC19M008302 |
| *MOV10* |  | GC01P112673 |
| *ELMO1* |  | GC07M036860 |
| *PRPF4B* |  | GC06P004021 |
| *PPFIBP1* |  | GC12P027523 |
| *SCGB1A1* |  | GC11P062405 |
| *NFIC* |  | GC19P003314 |
| *NLRX1* |  | GC11P119166 |
| *NUAK2* |  | GC01M205302 |
| *SENP3* |  | GC17P008040 |
| *TOMM40* |  | GC19P044890 |
| *STC1* |  | GC08M023841 |
| *POP1* |  | GC08P098117 |
| *IAPP* |  | GC12P021354 |
| *CCT4* |  | GC02M061868 |
| *LPO* |  | GC17P058218 |
| *ADRM1* |  | GC20P062302 |
| *EPB41L2* |  | GC06M130820 |
| *AGO2* |  | GC08M140522 |
| *MGAT3* |  | GC22P039447 |
| *HERC5* |  | GC04P088457 |
| *CLNS1A* |  | GC11M077515 |
| *HNRNPL* |  | GC19M038836 |
| *MYBBP1A* |  | GC17M004538 |
| *NBAS* |  | GC02M014998 |
| *NBEA* |  | GC13P034942 |
| *RPL28* |  | GC19P055498 |
| *NES* |  | GC01M156668 |
| *NEK6* |  | GC09P124259 |
| *SH2D1B* |  | GC01M162395 |
| *ICAM5* |  | GC19P010289 |
| *RPS8* |  | GC01P044775 |
| *NFYA* |  | GC06P047495 |
| *OSBP* |  | GC11M061253 |
| *OAZ1* |  | GC19P002269 |
| *SRSF9* |  | GC12M120461 |
| *TPBG* |  | GC06P082363 |
| *LAMP3* |  | GC03M183122 |
| *TRA2B* |  | GC03M185914 |
| *ULBP2* |  | GC06P149941 |
| *UPF3B* |  | GC0XM119805 |
| *MRPL1* |  | GC04P077862 |
| *USP47* |  | GC11P011819 |
| *ZNF169* |  | GC09P094259 |
| *ARID3B* |  | GC15P074541 |
| *GTF2E1* |  | GC03P120743 |
| *MRPS9* |  | GC02P105020 |
| *DEFA5* |  | GC08M007057 |
| *DDX24* |  | GC14M094048 |
| *PES1* |  | GC22M030576 |
| *SF1* |  | GC11M064764 |
| *IER3* |  | GC06M030743 |
| *TSR1* |  | GC17M002322 |
| *KLF12* |  | GC13M073686 |
| *KRR1* |  | GC12M075490 |
| *USP44* |  | GC12M095516 |
| *CAND1* |  | GC12P067270 |
| *GNL2* |  | GC01M037566 |
| *FHL5* |  | GC06P096562 |
| *ESRP1* |  | GC08P094641 |
| *FSTL3* |  | GC19P000676 |
| *GTPBP4* |  | GC10P000988 |
| *CEBPG* |  | GC19P033373 |
| *RHOF* |  | GC12M121777 |
| *COPS6* |  | GC07P100088 |
| *CLPTM1* |  | GC19P044954 |
| *MRPL46* |  | GC15M088466 |
| *DHX8* |  | GC17P043483 |
| *MRPS25* |  | GC03M015796 |
| *MRPS34* |  | GC16M001771 |
| *N4BP1* |  | GC16M048538 |
| *MORF4L2* |  | GC0XM103675 |
| *ENPP5* |  | GC06M046159 |
| *NIP7* |  | GC16P069342 |
| *INHBC* |  | GC12P057434 |
| *INHBE* |  | GC12P057452 |
| *UPK3A* |  | GC22P045284 |
| *KBTBD7* |  | GC13M041189 |
| *GZMK* |  | GC05P055024 |
| *THRSP* |  | GC11P078063 |
| *ZFX* |  | GC0XP024148 |
| *ZC3HAV1* |  | GC07M139044 |
| *XCL1* |  | GC01P168576 |
| *AKAP8L* |  | GC19M015380 |
| *ATF5* |  | GC19P049931 |
| *HOXD3* |  | GC02P176136 |
| *GIMAP5* |  | GC07P150722 |
| *DNAJC9* |  | GC10M073183 |
| *MRPL23* |  | GC11P001948 |
| *MRPL39* |  | GC21M025585 |
| *MRPL43* |  | GC10M100969 |
| *MRPL49* |  | GC11P065172 |
| *MRPS10* |  | GC06M042206 |
| *MRPS24* |  | GC07M043868 |
| *MRPS27* |  | GC05M072219 |
| *DOK3* |  | GC05M177501 |
| *DDX56* |  | GC07M044565 |
| *MNT* |  | GC17M002384 |
| *EIF4E3* |  | GC03M071675 |
| *EMCN* |  | GC04M100395 |
| *PFDN2* |  | GC01M161100 |
| *ICAM4* |  | GC19P010286 |
| *TNIP3* |  | GC04M121131 |
| *KLF9* |  | GC09M070384 |
| *QRFPR* |  | GC04M121328 |
| *TMEM132D* |  | GC12M129071 |
| *RBM14* |  | GC11P066631 |
| *MRPL10* |  | GC17M047824 |
| *ZC3H12A* |  | GC01P037474 |
| *ZMYM3* |  | GC0XM071239 |
| *VBP1* |  | GC0XP155197 |
| *BAG6* |  | GC06M031639 |
| *LST1* |  | GC06P047306 |
| *BOP1* |  | GC08M144262 |
| *MLF2* |  | GC12M006750 |
| *MRPL22* |  | GC05P154941 |
| *MRPS26* |  | GC20P003081 |
| *GLYR1* |  | GC16M004809 |
| *DDX52* |  | GC17M037609 |
| *DDX55* |  | GC12P123602 |
| *DDX28* |  | GC16M068023 |
| *PDZK1IP1* |  | GC01M047183 |
| *PSG2* |  | GC19M043064 |
| *SEPTIN9* |  | GC17P077282 |
| *SHF* |  | GC15M045167 |
| *RRP12* |  | GC10M097356 |
| *RRP9* |  | GC03M051943 |
| *RTCB* |  | GC22M032387 |
| *NFATC2IP* |  | GC16P029003 |
| *PTCD3* |  | GC02P086106 |
| *TAPBPL* |  | GC12P006451 |
| *PWP1* |  | GC12P107685 |
| *TMEM176A* |  | GC07P150800 |
| *NOL6* |  | GC09M033451 |
| *IFNL1* |  | GC19P039296 |
| *ZMYM6* |  | GC01M034986 |
| *ZNF593* |  | GC01P026171 |
| *YTHDC2* |  | GC05P113513 |
| *CCDC86* |  | GC11P060841 |
| *CRYGA* |  | GC02M208160 |
| *RGCC* |  | GC13P041457 |
| *MRTO4* |  | GC01P019251 |
| *RRS1* |  | GC08P066429 |
| *PLEKHA2* |  | GC08P038877 |
| *JPH4* |  | GC14M023568 |
| *PDCD11* |  | GC10P103396 |
| *ZNF32* |  | GC10M043643 |
| *GCFC2* |  | GC02M075652 |
| *HIPK4* |  | GC19M040379 |
| *DBF4B* |  | GC17P044708 |
| *SASH3* |  | GC0XP129781 |
| *NIFK* |  | GC02M121726 |
| *TMEM176B* |  | GC07M150791 |
| *KIAA1191* |  | GC05M176346 |
| *ZBTB7C* |  | GC18M048026 |
| *CCDC137* |  | GC17P081666 |
| *MAP7D1* |  | GC01P036155 |
| *ADGRF1* |  | GC06M046997 |
| *RBM42* |  | GC19P038222 |
| *P3H4* |  | GC17M041801 |
| *ZCCHC3* |  | GC20P000278 |
| *BEX1* |  | GC0XM103063 |
| *ADGRF3* |  | GC02M026308 |
| *C1orf35* |  | GC01M228100 |
| *MT-ND4* |  | GCMTP010762 |
| *LARP1B* |  | GC04P128061 |
| *ZNF787* |  | GC19M056090 |
| *DEFB103B* |  | GC08M007430 |
| *ZNF629* |  | GC16M030789 |
| *MTREX* |  | GC05P055308 |
| *TMA16* |  | GC04P163494 |
| *ZNF527* |  | GC19P037371 |
| *USP17L2* |  | GC08M012137 |
| *DEFB103A* |  | GC08P007881 |
| *BCL2L2-PABPN1* | | GC14P025307 |
| *C17orf99* |  | GC17P078146 |
| *ECRG4* |  | GC02P106063 |
| *POLR1G* |  | GC19P045409 |
| *PYURF* |  | GC04M088521 |
| *SLC35E2A* |  | GC01M001745 |
| *MIR124-1* |  | GC08M009903 |
| *H2AC19* |  | GC01P149917 |
| *DANCR* |  | GC04P052712 |
| *ELOA3* |  | GC18M047051 |
| *MIR499A* |  | GC20P034990 |
| *MIR137* |  | GC01M098046 |
| *MIRLET7F1* |  | GC09P094193 |
| *MT-RNR2* |  | GCMTP001674 |
| *MIR124-3* |  | GC20P063180 |
| *MIR377* |  | GC14P104794 |
| *IGKV4-1* |  | GC02P088885 |
| *MIR649* |  | GC22M021034 |
| *MIR378I* |  | GC22M045412 |
| *MIR4484* |  | GC10P125819 |
| *TRGV9* |  | GC07M038652 |
| *MIR378D2* |  | GC08M093916 |
| *MIR378E* |  | GC05P170028 |
| *MIR3117* |  | GC01P066628 |
| *MIR3140* |  | GC04M152490 |
| *MIR4523* |  | GC17P029390 |
| *MIR5193* |  | GC03M049806 |
| *MIR5196* |  | GC19P038217 |
| *MIR3177* |  | GC16P001734 |
| *MIR4466* |  | GC06M156779 |
| *TRDV2* |  | GC14P022426 |
| *MIR4423* |  | GC01P085133 |
| *IGHV1-46* |  | GC14M109592 |
| *MIR151B* |  | GC14M100109 |
| *MIR3936* |  | GC05M132365 |
| *MIR3136* |  | GC03M069048 |
| *MIR3150B* |  | GC08M095072 |
| *MIR3183* |  | GC17M001022 |
| *MIR329-1* |  | GC14P104784 |
| *MIR329-2* |  | GC14P104785 |
| *MIR4505* |  | GC14P073758 |
| *MIR4511* |  | GC15M065719 |
| *MIR4513* |  | GC15M074788 |
| *MIR4515* |  | GC15P083243 |
| *MIR4517* |  | GC16P029005 |
| *MIR5189* |  | GC16P088537 |
| *MIR548X2* |  | GC13M065966 |
| *MIR4437* |  | GC02M181305 |
| *MIR4476* |  | GC09M036895 |
| *MIR4492* |  | GC11P118910 |
| *MIR4496* |  | GC12P108638 |
| *IGHV3-66* |  | GC14M109622 |
| *IGHV3-13* |  | GC14M106129 |
| *IGHV3-15* |  | GC14M106153 |
| *MIR550A3* |  | GC07M029945 |
| *MIR4420* |  | GC01M030739 |
| *MIR4429* |  | GC02M011540 |
| *MIR3689C* |  | GC09M134984 |
| *MIR3689F* |  | GC09M134983 |
| *MIR378D1* |  | GC04M005923 |
| *MIR3151* |  | GC08P103154 |
| *MIR3154* |  | GC09M128246 |
| *MIR548AC* |  | GC01M116560 |
| *MIR548AN* |  | GC0XP106639 |
| *MIR4510* |  | GC15P035926 |
| *MIR4516* |  | GC16P002441 |
| *MIR4518* |  | GC16P030518 |
| *MIR4521* |  | GC17P008479 |
| *MIR4526* |  | GC18P013613 |
| *MIR4537* |  | GC14M109533 |
| *MIR5188* |  | GC12P124915 |
| *MIR378F* |  | GC01P023929 |
| *MIR378G* |  | GC01M094745 |
| *MIR4435-2* |  | GC02M111322 |
| *MIR4442* |  | GC03M025664 |
| *MIR4444-1* |  | GC02P177213 |
| *MIR4448* |  | GC03P183886 |
| *MIR4449* |  | GC04P052724 |
| *MIR4450* |  | GC04P076573 |
| *MIR4451* |  | GC04P085722 |
| *MIR4454* |  | GC04M163093 |
| *MIR4464* |  | GC06P090312 |
| *MIR4473* |  | GC09M020413 |
| *MIR4478* |  | GC09M122120 |
| *MIR4482* |  | GC10M104268 |
| *MIR4485* |  | GC11M010652 |
| *MIR4487* |  | GC11P047424 |
| *IGKV1-39* |  | GC02M089843 |
| *IGHV3-72* |  | GC14M109660 |
| *MIR4425* |  | GC01P025023 |
| *MIR1268B* |  | GC17P080098 |
| *MIR3190* |  | GC19P047226 |
| *MIR548AK* |  | GC10M012130 |
| *MIR548AL* |  | GC11P074400 |
| *MIR4497* |  | GC12P109833 |
| *MIR4508* |  | GC15M023562 |
| *MIR4522* |  | GC17M027293 |
| *MIR4524A* |  | GC17M069099 |
| *MIR4525* |  | GC17M082668 |
| *MIR4530* |  | GC19M042449 |
| *MIR5187* |  | GC01P161227 |
| *MIR5191* |  | GC01P201690 |
| *MIR5194* |  | GC08M130008 |
| *MIR548O2* |  | GC20P038516 |
| *MIR4435-1* |  | GC02P087629 |
| *MIR4446* |  | GC03P113594 |
| *MIR4447* |  | GC03M116851 |
| *MIR4469* |  | GC08M042896 |
| *MIR4470* |  | GC08P061714 |
| *MIR5006* |  | GC13M041570 |
| *MIR4488* |  | GC11P061508 |
| *MIR4489* |  | GC11P065832 |
| *MIR4494* |  | GC12M047364 |
| *MIR4422* |  | GC01P055225 |
| *MIR4427* |  | GC01P233625 |
| *MIR3689E* |  | GC09M134982 |
| *MIR3942* |  | GC15M035372 |
| *MIR3135B* |  | GC06M032749 |
| *MIR1269B* |  | GC17M012917 |
| *MIR548AB* |  | GC03M103524 |
| *MIR548AD* |  | GC02P035503 |
| *MIR548AI* |  | GC06P099124 |
| *MIR548AJ1* |  | GC06M132115 |
| *MIR548AJ2* |  | GC0XM038023 |
| *MIR548AM* |  | GC0XM016646 |
| *MIR4499* |  | GC13M020433 |
| *MIR4502* |  | GC13P114273 |
| *MIR4504* |  | GC14M050299 |
| *MIR4506* |  | GC14M093948 |
| *MIR4507* |  | GC14M109536 |
| *MIR4512* |  | GC15M066496 |
| *MIR4519* |  | GC16M030889 |
| *MIR4520-1* |  | GC17M006655 |
| *MIR4529* |  | GC18P055479 |
| *MIR4534* |  | GC22P037995 |
| *MIR4538* |  | GC14M109535 |
| *MIR5186* |  | GC03M151566 |
| *MIR5192* |  | GC02P062205 |
| *MIR548H5* |  | GC06P131792 |
| *MIR378H* |  | GC05P154829 |
| *MIR4430* |  | GC02P033418 |
| *MIR4436A* |  | GC02P088812 |
| *MIR4439* |  | GC02M225010 |
| *MIR4440* |  | GC02M239124 |
| *MIR4441* |  | GC02M239122 |
| *MIR4443* |  | GC03P048198 |
| *MIR4452* |  | GC04M086542 |
| *MIR4458* |  | GC05P008460 |
| *MIR4460* |  | GC05M129397 |
| *MIR4467* |  | GC07P102469 |
| *MIR4472-1* |  | GC08P142176 |
| *MIR4477B* |  | GC09P063819 |
| *MIR4479* |  | GC09P136886 |
| *MIR4539* |  | GC14M109534 |
| *MIR4637* |  | GC05M014829 |
| *IGKV1D-39* |  | GC02P090479 |
| *IGHJ1* |  | GC14M109544 |
| *TRAV40* |  | GC14P022316 |
| *MIR4421* |  | GC01P051059 |
| *MIR4424* |  | GC01P178648 |
| *MIR4426* |  | GC01P192718 |
| *IGHV1-45* |  | GC14M109591 |
| *MIR1587* |  | GC0XP039837 |
| *MIR3689D2* |  | GC09M134980 |
| *MIR2392* |  | GC14P104779 |
| *MIR3155B* |  | GC10M006152 |
| *MIR548AE1* |  | GC02P184378 |
| *MIR548AG1* |  | GC04P060922 |
| *MIR548AG2* |  | GC20P060565 |
| *MIR548AH* |  | GC04P076575 |
| *MIR4498* |  | GC12M120155 |
| *MIR4500* |  | GC13M087618 |
| *MIR4528* |  | GC18P053237 |
| *MIR4531* |  | GC19M044653 |
| *MIR4535* |  | GC22P048780 |
| *MIR4536-1* |  | GC0XM055451 |
| *MIR5190* |  | GC18P013464 |
| *MIR5195* |  | GC14M109628 |
| *MIR5197* |  | GC05P143679 |
| *MIR4431* |  | GC02M052702 |
| *MIR4432* |  | GC02M060387 |
| *MIR4433A* |  | GC02P064340 |
| *MIR4434* |  | GC02P064525 |
| *MIR4438* |  | GC02P213758 |
| *MIR4453* |  | GC04P152536 |
| *MIR4455* |  | GC04M184941 |
| *MIR4456* |  | GC05M000536 |
| *MIR4457* |  | GC05M001311 |
| *MIR4462* |  | GC06M037555 |
| *MIR4465* |  | GC06P140683 |
| *MIR4471* |  | GC08P100382 |
| *MIR4472-2* |  | GC12M116428 |
| *MIR4480* |  | GC10P012578 |
| *MIR4774* |  | GC02P168582 |
| *MIR4486* |  | GC11P019575 |
| *MIR4493* |  | GC11M123381 |
| *MIR4495* |  | GC12M097939 |
| *MIR4540* |  | GC09M036866 |
| *MIR5000* |  | GC02P075090 |
| *MIR4418* |  | GC01P022266 |
| *MIR4428* |  | GC01P237471 |
| *MIR3689D1* |  | GC09M134986 |
| *MIR548AE2* |  | GC05M058530 |
| *MIR4501* |  | GC13P096427 |
| *MIR4503* |  | GC14M036952 |
| *MIR4509-1* |  | GC15P024591 |
| *MIR4509-2* |  | GC15P028426 |
| *MIR4509-3* |  | GC15M028490 |
| *MIR4514* |  | GC15M080997 |
| *MIR4527* |  | GC18P047380 |
| *MIR4533* |  | GC20P060478 |
| *MIR4445* |  | GC03P109602 |
| *MIR4468* |  | GC07P138123 |
| *MIR4475* |  | GC09M036825 |
| *MIR4477A* |  | GC09P041233 |
| *MIR4483* |  | GC10M113777 |
| *MIR4490* |  | GC11M090555 |
| *MIR7977* |  | GC03P176515 |
| *MIR4444-2* |  | GC03P075214 |
| *IFNR* |  | GC16U990029 |
| *AZF1* |  | GC0YU990003 |
| *FRA16B* |  | GC16P065321 |
| *BRINP1* |  | GC09M119153 |
| *PPP3CA* |  | GC04M101024 |
| *ACTG1* |  | GC17M081509 |
| *PROC* |  | GC02P127418 |
| *KCNH2* |  | GC07M150944 |
| *ASS1* |  | GC09P130444 |
| *GSN* |  | GC09P121201 |
| *GRIA1* |  | GC05P153467 |
| *NCF1* |  | GC07P074773 |
| *PRMT1* |  | GC19P049675 |
| *IRAK3* |  | GC12P066188 |
| *PPP2R1A* |  | GC19P052189 |
| *PLA2G6* |  | GC22M046185 |
| *ABL2* |  | GC01M179108 |
| *AMPD3* |  | GC11P010309 |
| *MSX1* |  | GC04P004861 |
| *DHODH* |  | GC16P072008 |
| *PAFAH1B1* |  | GC17P002593 |
| *PPP3R1* |  | GC02M068143 |
| *NNMT* |  | GC11P114257 |
| *SLC25A3* |  | GC12P098593 |
| *SMARCE1* |  | GC17M040624 |
| *NUP62* |  | GC19M049906 |
| *TUBA4A* |  | GC02M219249 |
| *TEC* |  | GC04M048137 |
| *COL18A1* |  | GC21P045405 |
| *TARDBP* |  | GC01P011013 |
| *SDHC* |  | GC01P161314 |
| *SDHD* |  | GC11P112087 |
| *TPH1* |  | GC11M018040 |
| *FCER1A* |  | GC01P159259 |
| *CLIC5* |  | GC06M045848 |
| *GSTO2* |  | GC10P104268 |
| *SFTPB* |  | GC02M085657 |
| *SFTPC* |  | GC08P022156 |
| *IGFBP4* |  | GC17P040443 |
| *RRAS* |  | GC19M049635 |
| *TRIM32* |  | GC09P116687 |
| *TAF15* |  | GC17P035713 |
| *POLR1C* |  | GC06P047535 |
| *PPAT* |  | GC04M056393 |
| *MAGED1* |  | GC0XP051803 |
| *PRKRA* |  | GC02M178431 |
| *TK2* |  | GC16M066508 |
| *SPRED1* |  | GC15P038252 |
| *ADD3* |  | GC10P109996 |
| *CCT3* |  | GC01M156308 |
| *EXOSC2* |  | GC09P130693 |
| *AFF2* |  | GC0XP148500 |
| *MATR3* |  | GC05P139274 |
| *RHOG* |  | GC11M003848 |
| *RFX5* |  | GC01M151340 |
| *MS4A2* |  | GC11P060088 |
| *MPG* |  | GC16P001366 |
| *NKX3-1* |  | GC08M023678 |
| *PHF8* |  | GC0XM053936 |
| *TREM1* |  | GC06M041267 |
| *PTP4A3* |  | GC08P141391 |
| *PTX3* |  | GC03P157436 |
| *DLX3* |  | GC17M049990 |
| *BAG2* |  | GC06P057172 |
| *ARHGEF4* |  | GC02P130836 |
| *AATF* |  | GC17P036948 |
| *HOXA7* |  | GC07M027153 |
| *CNOT1* |  | GC16M058519 |
| *CNOT7* |  | GC08M017224 |
| *DNAJA3* |  | GC16P004425 |
| *MOB1A* |  | GC02M074152 |
| *DDX17* |  | GC22M038483 |
| *DDX18* |  | GC02P117878 |
| *PFKFB2* |  | GC01P207034 |
| *SART1* |  | GC11P065979 |
| *SLCO3A1* |  | GC15P091856 |
| *POGLUT1* |  | GC03P119468 |
| *RCN2* |  | GC15P076931 |
| *RBM10* |  | GC0XP047162 |
| *CCL25* |  | GC19P008117 |
| *CTCFL* |  | GC20M057495 |
| *CDCP1* |  | GC03M045082 |
| *PPP1R9B* |  | GC17M050133 |
| *PTMA* |  | GC02P231707 |
| *TRAPPC9* |  | GC08M139728 |
| *CD180* |  | GC05M067181 |
| *RBM3* |  | GC0XP048574 |
| *THAP1* |  | GC08M042836 |
| *CDC23* |  | GC05M138198 |
| *SNRNP70* |  | GC19P049085 |
| *SRSF4* |  | GC01M029147 |
| *SRSF5* |  | GC14P069727 |
| *TOB2* |  | GC22M041433 |
| *CCT8* |  | GC21M029055 |
| *ERC2* |  | GC03M055509 |
| *CELF1* |  | GC11M061128 |
| *EBNA1BP2* |  | GC01M043165 |
| *PRPF19* |  | GC11M060890 |
| *SRRT* |  | GC07P100875 |
| *TRAPPC10* |  | GC21P044012 |
| *TPPP3* |  | GC16M067389 |
| *KLRG1* |  | GC12P008950 |
| *SRRM1* |  | GC01P024631 |
| *TFIP11* |  | GC22M026491 |
| *ATP5F1A* |  | GC18M046081 |
| *ERH* |  | GC14M069380 |
| *CDX1* |  | GC05P150133 |
| *SRSF10* |  | GC01M023964 |
| *KRT85* |  | GC12M052361 |
| *ZNHIT3* |  | GC17P036486 |
| *INTS10* |  | GC08P019817 |
| *HES5* |  | GC01M002528 |
| *CREBL2* |  | GC12P012611 |
| *NSG1* |  | GC04P004350 |
| *PRRC2C* |  | GC01P171486 |
| *RUBCN* |  | GC03M197673 |
| *TBL1Y* |  | GC0YP006910 |
| *ELSPBP1* |  | GC19P047994 |
| *AMELY* |  | GC0YM006865 |
| *RTRAF* |  | GC14P051992 |
| *C9orf62* |  | GC09P135343 |
| *BORCS5* |  | GC12P012358 |
| *HMHB1* |  | GC05P143812 |
| *PRKY* |  | GC0YP007273 |
| *LOH12CR2* |  | GC12M012355 |
| *RNF217-AS1* |  | GC06M124563 |
| *KIR2DP1* |  | GC19P055436 |
| *LOC107126359* | | GC02P176084 |
| *LOC106677019* | | GC17P058284 |
| *S100A6* |  | GC01M153535 |
| *VAMP2* |  | GC17M008854 |
| *HABP4* |  | GC09P096450 |
| *ROR2* |  | GC09M091564 |
| *GDNF* |  | GC05M037812 |
| *ATF6* |  | GC01P161766 |
| *CGA* |  | GC06M087085 |
| *SH3KBP1* |  | GC0XM019552 |
| *TSPAN33* |  | GC07P129457 |
| *PPARD* |  | GC06P047433 |
| *PPP4C* |  | GC16P030130 |
| *ANXA11* |  | GC10M080150 |
| *TNFRSF12A* |  | GC16P003018 |
| *REV3L* |  | GC06M111299 |
| *EPM2A* |  | GC06M145382 |
| *CEACAM1* |  | GC19M042507 |
| *CPD* |  | GC17P030378 |
| *PDGFRL* |  | GC08P017576 |
| *PPIG* |  | GC02P169584 |
| *GHRH* |  | GC20M037251 |
| *RNF19B* |  | GC01M032933 |
| *ELL3* |  | GC15M043773 |
| *CGB3* |  | GC19M049024 |
| *DUSP5P1* |  | GC01P228647 |
| *APP* |  | GC21M025880 |
| *GLUD1* |  | GC10M087050 |
| *ESRRB* |  | GC14P076310 |
| *ACTN1* |  | GC14M068874 |
| *HNF4A* |  | GC20P044355 |
| *GRIN2B* |  | GC12M013437 |
| *TBXAS1* |  | GC07P139777 |
| *PAK3* |  | GC0XP110944 |
| *CAPN1* |  | GC11P065198 |
| *FLNA* |  | GC0XM154348 |
| *GRIN1* |  | GC09P137138 |
| *RRM2B* |  | GC08M102204 |
| *CAMK2D* |  | GC04M113452 |
| *MARK3* |  | GC14P103385 |
| *LRP5* |  | GC11P068298 |
| *LRP6* |  | GC12M013893 |
| *ADRB1* |  | GC10P114044 |
| *GABRB3* |  | GC15M026543 |
| *CSF2RB* |  | GC22P036913 |
| *RORA* |  | GC15M060488 |
| *PDE4D* |  | GC05M058969 |
| *NF2* |  | GC22P029603 |
| *PLCD1* |  | GC03M038008 |
| *ST3GAL5* |  | GC02M085839 |
| *PYGL* |  | GC14M050857 |
| *F7* |  | GC13P113105 |
| *BACE1* |  | GC11M117285 |
| *ARSA* |  | GC22M050622 |
| *HMOX2* |  | GC16P004474 |
| *MMP8* |  | GC11M102617 |
| *COL4A1* |  | GC13M110148 |
| *IHH* |  | GC02M219054 |
| *SLC7A7* |  | GC14M022773 |
| *PITX2* |  | GC04M110617 |
| *PLCB3* |  | GC11P064251 |
| *SLC12A3* |  | GC16P056865 |
| *TTN* |  | GC02M178525 |
| *LIMK2* |  | GC22P031212 |
| *KLKB1* |  | GC04P186208 |
| *MSX2* |  | GC05P174724 |
| *MAP3K11* |  | GC11M065598 |
| *AMPD2* |  | GC01P109616 |
| *ABCB6* |  | GC02M219209 |
| *GPI* |  | GC19P034359 |
| *DDX5* |  | GC17M064498 |
| *SLC25A1* |  | GC22M019176 |
| *SLC25A13* |  | GC07M096120 |
| *SLC19A2* |  | GC01M169463 |
| *WNK1* |  | GC12P000733 |
| *GPC3* |  | GC0XM133535 |
| *FANCL* |  | GC02M058127 |
| *MAPK8IP1* |  | GC11P045988 |
| *LPAR1* |  | GC09M110873 |
| *AMPD1* |  | GC01M114673 |
| *EPS15* |  | GC01M051354 |
| *ADAMTS13* |  | GC09P133414 |
| *GLO1* |  | GC06M042239 |
| *EPHA8* |  | GC01P022563 |
| *CDK5R1* |  | GC17P032486 |
| *CKB* |  | GC14M103519 |
| *RIT1* |  | GC01M155897 |
| *DPYS* |  | GC08M104397 |
| *PDP1* |  | GC08P093857 |
| *NR5A2* |  | GC01P199996 |
| *SERPINH1* |  | GC11P075562 |
| *SERPINI1* |  | GC03P167735 |
| *NPHS1* |  | GC19M035825 |
| *HSD17B10* |  | GC0XM053431 |
| *PPP1CC* |  | GC12M110709 |
| *S100A10* |  | GC01M151955 |
| *SLC5A5* |  | GC19P023315 |
| *PKP2* |  | GC12M032790 |
| *PITX1* |  | GC05M135027 |
| *SMAD9* |  | GC13M036844 |
| *IMPA2* |  | GC18P011981 |
| *TNFSF15* |  | GC09M114784 |
| *LAMA1* |  | GC18M006941 |
| *TUBA8* |  | GC22P018110 |
| *ITGB5* |  | GC03M124761 |
| *SYNJ1* |  | GC21M032628 |
| *KLK1* |  | GC19M050819 |
| *RAD21* |  | GC08M116846 |
| *SUOX* |  | GC12P055997 |
| *RAB5A* |  | GC03P019963 |
| *TLK2* |  | GC17P062458 |
| *TXN2* |  | GC22M036467 |
| *DCX* |  | GC0XM111293 |
| *CHD1* |  | GC05M098853 |
| *DLST* |  | GC14P074881 |
| *POLD1* |  | GC19P050385 |
| *PPARA* |  | GC22P046150 |
| *USP14* |  | GC18P000158 |
| *VDAC1* |  | GC05M133975 |
| *WIF1* |  | GC12M065050 |
| *WNT11* |  | GC11M076186 |
| *GABARAPL2* |  | GC16P075566 |
| *GMPS* |  | GC03P155870 |
| *MAPRE1* |  | GC20P032819 |
| *ARSB* |  | GC05M078777 |
| *AOX1* |  | GC02P200585 |
| *ADAR* |  | GC01M154582 |
| *BTC* |  | GC04M074744 |
| *GABARAP* |  | GC17M007240 |
| *FTO* |  | GC16P053737 |
| *EPS8* |  | GC12M015621 |
| *HK3* |  | GC05M176882 |
| *DAPK3* |  | GC19M003958 |
| *COL4A3* |  | GC02P227164 |
| *COL4A6* |  | GC0XM108155 |
| *NDUFS2* |  | GC01P161197 |
| *ELN* |  | GC07P074027 |
| *NEUROD1* |  | GC02M181673 |
| *PDIA3* |  | GC15P043746 |
| *SIAH2* |  | GC03M150741 |
| *IDI1* |  | GC10M001039 |
| *SNRPN* |  | GC15P024823 |
| *S1PR3* |  | GC09P088991 |
| *SALL1* |  | GC16M051135 |
| *RXFP1* |  | GC04P158315 |
| *RPL35* |  | GC09M124857 |
| *SLC7A5* |  | GC16M087830 |
| *SLC46A1* |  | GC17M029956 |
| *SLC25A5* |  | GC0XP119468 |
| *NTN1* |  | GC17P009021 |
| *RPS3* |  | GC11P075836 |
| *TBC1D4* |  | GC13M075284 |
| *HAO1* |  | GC20M007863 |
| *SNAP23* |  | GC15P042491 |
| *PBRM1* |  | GC03M052545 |
| *KRT6A* |  | GC12M052488 |
| *TICAM1* |  | GC19M004815 |
| *LIAS* |  | GC04P039461 |
| *VAMP1* |  | GC12M006462 |
| *GIT1* |  | GC17M029573 |
| *CCT5* |  | GC05P010236 |
| *LPAR3* |  | GC01M084811 |
| *LONP1* |  | GC19M005691 |
| *FBLN2* |  | GC03P013565 |
| *ENTPD5* |  | GC14M073958 |
| *ALOX12B* |  | GC17M008851 |
| *ACAA1* |  | GC03M038103 |
| *FNTA* |  | GC08P043034 |
| *GABARAPL1* |  | GC12P010212 |
| *FUT3* |  | GC19M005843 |
| *HOXA13* |  | GC07M027263 |
| *GAP43* |  | GC03P115623 |
| *GYPC* |  | GC02P126655 |
| *RHOQ* |  | GC02P046543 |
| *CLK3* |  | GC15P074598 |
| *MLPH* |  | GC02P237485 |
| *CHIT1* |  | GC01M203181 |
| *MRPS16* |  | GC10M073248 |
| *DKK2* |  | GC04M106921 |
| *RPL18* |  | GC19M048615 |
| *RPL21* |  | GC13P027251 |
| *GRB10* |  | GC07M050590 |
| *COL4A4* |  | GC02M226967 |
| *COL4A5* |  | GC0XP108439 |
| *NDUFA9* |  | GC12P004649 |
| *IL1RAP* |  | GC03P190514 |
| *PRKCSH* |  | GC19P011435 |
| *NRF1* |  | GC07P129611 |
| *PANX1* |  | GC11P094128 |
| *PPP2R5C* |  | GC14P104897 |
| *IGFBP5* |  | GC02M216672 |
| *RSPO2* |  | GC08M107899 |
| *NFIB* |  | GC09M014077 |
| *RPS2* |  | GC16M002198 |
| *RPS20* |  | GC08M056067 |
| *SLCO2A1* |  | GC03M133932 |
| *SLC4A2* |  | GC07P151057 |
| *SLC25A6* |  | GC0XM001386 |
| *SLC38A1* |  | GC12M046183 |
| *SLC25A11* |  | GC17M004937 |
| *PTGES3* |  | GC12M056667 |
| *UCHL3* |  | GC13P075550 |
| *LGR5* |  | GC12P071439 |
| *IRF6* |  | GC01M209785 |
| *KPNA4* |  | GC03M160494 |
| *TECR* |  | GC19P014504 |
| *KLK2* |  | GC19P050861 |
| *SURF1* |  | GC09M133351 |
| *TLE3* |  | GC15M070047 |
| *PSMD2* |  | GC03P184298 |
| *P2RX1* |  | GC17M003896 |
| *EGR2* |  | GC10M062811 |
| *HSPA1L* |  | GC06M031809 |
| *HSPA2* |  | GC14P064535 |
| *TIE1* |  | GC01P043300 |
| *USP24* |  | GC01M055066 |
| *XRN2* |  | GC20P021303 |
| *VAC14* |  | GC16M070688 |
| *CALM3* |  | GC19P046601 |
| *GATAD2B* |  | GC01M153805 |
| *ASPH* |  | GC08M061500 |
| *MEIS2* |  | GC15M036889 |
| *FOXE1* |  | GC09P097853 |
| *ATXN2* |  | GC12M111443 |
| *CX3CL1* |  | GC16P057372 |
| *CDK16* |  | GC0XP047217 |
| *HIPK3* |  | GC11P033278 |
| *CNP* |  | GC17P041966 |
| *CNTNAP1* |  | GC17P042680 |
| *MLH3* |  | GC14M075013 |
| *HBG1* |  | GC11M005355 |
| *DYNLL1* |  | GC12P120469 |
| *CD96* |  | GC03P111292 |
| *PRPF4* |  | GC09P113275 |
| *SECISBP2* |  | GC09P089318 |
| *PARD6A* |  | GC16P067661 |
| *SAA1* |  | GC11P018267 |
| *SDC3* |  | GC01M030869 |
| *RPS7* |  | GC02P003575 |
| *RPL7A* |  | GC09P133348 |
| *IQSEC1* |  | GC03M015774 |
| *UCHL5* |  | GC01M193012 |
| *LDHC* |  | GC11P018433 |
| *TRH* |  | GC03P129974 |
| *RBMX* |  | GC0XM136848 |
| *ITSN1* |  | GC21P033642 |
| *TLK1* |  | GC02M170990 |
| *EFTUD2* |  | GC17M044852 |
| *RPL31* |  | GC02P100985 |
| *PMPCB* |  | GC07P103297 |
| *ALOXE3* |  | GC17M008849 |
| *BRPF1* |  | GC03P009731 |
| *GDF15* |  | GC19P023329 |
| *GART* |  | GC21M033503 |
| *GOPC* |  | GC06M117560 |
| *ARHGAP9* |  | GC12M057472 |
| *FANCE* |  | GC06P047436 |
| *ALDH9A1* |  | GC01M165667 |
| *ALOX15B* |  | GC17P008039 |
| *ANK2* |  | GC04P112706 |
| *AGGF1* |  | GC05P077029 |
| *BPI* |  | GC20P038304 |
| *BST1* |  | GC04P015704 |
| *MFAP2* |  | GC01M016974 |
| *FUT6* |  | GC19M005830 |
| *C8A* |  | GC01P056854 |
| *C8G* |  | GC09P136944 |
| *FSTL1* |  | GC03M120392 |
| *CRABP1* |  | GC15P078340 |
| *HOXA11* |  | GC07M027259 |
| *CAPNS1* |  | GC19P038254 |
| *CNOT2* |  | GC12P070242 |
| *HNRNPC* |  | GC14M021210 |
| *CNBP* |  | GC03M129167 |
| *CLCA2* |  | GC01P086424 |
| *RIN2* |  | GC20P019759 |
| *MN1* |  | GC22M027748 |
| *MRPS22* |  | GC03P139005 |
| *RPL12* |  | GC09M127447 |
| *RPL13* |  | GC16P089640 |
| *RPL13A* |  | GC19P049487 |
| *RPL10A* |  | GC06P047437 |
| *RPL19* |  | GC17P039200 |
| *CDC27* |  | GC17M047117 |
| *SETDB1* |  | GC01P150926 |
| *SEC61A1* |  | GC03P128051 |
| *PABPC4* |  | GC01M039560 |
| *SNRNP200* |  | GC02M096275 |
| *PRMT3* |  | GC11P020409 |
| *SNRPE* |  | GC01P203865 |
| *RPS27* |  | GC01P153991 |
| *RPL4* |  | GC15M066498 |
| *RPL8* |  | GC08M144790 |
| *RPS12* |  | GC06P132814 |
| *RPS15A* |  | GC16M018781 |
| *SLC7A8* |  | GC14M023125 |
| *SMPD3* |  | GC16M068358 |
| *PLOD1* |  | GC01P011934 |
| *RPS5* |  | GC19P058386 |
| *PSMC5* |  | GC17P063827 |
| *PTGDR2* |  | GC11M060850 |
| *PTPRM* |  | GC18P007557 |
| *TNFAIP1* |  | GC17P028335 |
| *TUBA1C* |  | GC12P049188 |
| *UBE2Q2* |  | GC15P075843 |
| *RASSF2* |  | GC20M004780 |
| *RANBP9* |  | GC06M013621 |
| *RASGRP3* |  | GC02P033436 |
| *KLK15* |  | GC19M050825 |
| *KCNH6* |  | GC17P063523 |
| *RAB5C* |  | GC17M042124 |
| *KSR1* |  | GC17P027456 |
| *LHX4* |  | GC01P180230 |
| *RPL23A* |  | GC17P028719 |
| *MOGS* |  | GC02M074461 |
| *POLRMT* |  | GC19M000617 |
| *PUM1* |  | GC01M030931 |
| *KMT2C* |  | GC07M152134 |
| *TFF2* |  | GC21M042346 |
| *KRT6B* |  | GC12M052446 |
| *VAMP8* |  | GC02P085561 |
| *ULK2* |  | GC17M019933 |
| *UBA7* |  | GC03M049805 |
| *ANAPC1* |  | GC02M111611 |
| *CCT2* |  | GC12P069585 |
| *CCT7* |  | GC02P073233 |
| *AKAP12* |  | GC06P151239 |
| *FMN2* |  | GC01P240014 |
| *FOXRED1* |  | GC11P126269 |
| *CTDSP1* |  | GC02P218398 |
| *CLEC10A* |  | GC17M007074 |
| *CAPZA1* |  | GC01P112619 |
| *CDK12* |  | GC17P039461 |
| *CKS2* |  | GC09P089311 |
| *RIOK1* |  | GC06P007389 |
| *DNAJA2* |  | GC16M046955 |
| *CDCA7L* |  | GC07M021900 |
| *DEF6* |  | GC06P047431 |
| *MRC2* |  | GC17P062627 |
| *RFC5* |  | GC12P118013 |
| *CSGALNACT1* |  | GC08M019404 |
| *ELMO2* |  | GC20M046366 |
| *NEK4* |  | GC03M052708 |
| *RPL30* |  | GC08M098024 |
| *RPL27A* |  | GC11P008682 |
| *NOX3* |  | GC06M155395 |
| *SIX2* |  | GC02M045005 |
| *PPP2R5A* |  | GC01P212285 |
| *SNRPA* |  | GC19P040750 |
| *PCMT1* |  | GC06P149749 |
| *SCD5* |  | GC04M082629 |
| *RPS23* |  | GC05M082273 |
| *NFYB* |  | GC12M104117 |
| *RPS16* |  | GC19M039433 |
| *SLC39A6* |  | GC18M036108 |
| *PIGH* |  | GC14M067581 |
| *TPD52* |  | GC08M080034 |
| *UFM1* |  | GC13P038349 |
| *UPF1* |  | GC19P018831 |
| *TSPYL1* |  | GC06M116274 |
| *TAF6* |  | GC07M100107 |
| *TBC1D1* |  | GC04P037892 |
| *RCC1* |  | GC01P028505 |
| *SUPT3H* |  | GC06M044807 |
| *RAB6A* |  | GC11M073676 |
| *RAB8A* |  | GC19P016111 |
| *SRSF3* |  | GC06P047457 |
| *LIMS1* |  | GC02P108609 |
| *RPS28* |  | GC19P008322 |
| *DHX30* |  | GC03P047802 |
| *POLR1B* |  | GC02P115296 |
| *RASA2* |  | GC03P141487 |
| *P4HA1* |  | GC10M073007 |
| *SNRPD2* |  | GC19M045688 |
| *TFCP2* |  | GC12M051093 |
| *ZP1* |  | GC11P060867 |
| *KRT2* |  | GC12M052647 |
| *VSX2* |  | GC14P074239 |
| *GGCT* |  | GC07M030496 |
| *AZIN1* |  | GC08M102826 |
| *GLIS3* |  | GC09M003816 |
| *FIGNL1* |  | GC07M050444 |
| *EXOSC10* |  | GC01M011067 |
| *ARID3A* |  | GC19P000926 |
| *ARIH1* |  | GC15P072474 |
| *ARIH2* |  | GC03P048918 |
| *ARHGEF5* |  | GC07P144355 |
| *MAF1* |  | GC08P144106 |
| *FBXL3* |  | GC13M076992 |
| *LSM3* |  | GC03P014180 |
| *MED25* |  | GC19P049819 |
| *ABI2* |  | GC02P203327 |
| *FASTK* |  | GC07M151077 |
| *CTDSP2* |  | GC12M057819 |
| *CPSF6* |  | GC12P069239 |
| *GIGYF2* |  | GC02P232698 |
| *CENPA* |  | GC02P026750 |
| *COX11* |  | GC17M054951 |
| *HLTF* |  | GC03M149030 |
| *HNRNPDL* |  | GC04M082422 |
| *HNRNPR* |  | GC01M023303 |
| *MYRIP* |  | GC03P039826 |
| *RPL18A* |  | GC19P023313 |
| *NAP1L1* |  | GC12M076036 |
| *DDX50* |  | GC10P068901 |
| *DAZL* |  | GC03M016586 |
| *RNF40* |  | GC16P030775 |
| *RNF10* |  | GC12P120535 |
| *RPL24* |  | GC03M101681 |
| *NEU2* |  | GC02P233032 |
| *NEU3* |  | GC11P074988 |
| *RPL32* |  | GC03M012834 |
| *CSRP2* |  | GC12M076859 |
| *CRTC3* |  | GC15P090529 |
| *RIT2* |  | GC18M042743 |
| *SON* |  | GC21P033542 |
| *PROZ* |  | GC13P113158 |
| *SLA* |  | GC08M133040 |
| *NPFFR1* |  | GC10M070247 |
| *PAIP2* |  | GC05P139353 |
| *SP2* |  | GC17P047896 |
| *SNRPC* |  | GC06P047426 |
| *PRDM9* |  | GC05P023443 |
| *PRDM14* |  | GC08M070063 |
| *RPL36* |  | GC19P005674 |
| *EMP3* |  | GC19P048321 |
| *RPS11* |  | GC19P049496 |
| *NIPAL4* |  | GC05P157460 |
| *SLC9A9* |  | GC03M143265 |
| *SLC30A3* |  | GC02M027254 |
| *RPS4X* |  | GC0XM072255 |
| *IMPG1* |  | GC06M075921 |
| *SRSF6* |  | GC20P043457 |
| *SRSF7* |  | GC02M038709 |
| *IPO5* |  | GC13P097953 |
| *PHF2* |  | GC09P093576 |
| *TRAM1* |  | GC08M070573 |
| *TPD52L1* |  | GC06P125119 |
| *TNRC6A* |  | GC16P024611 |
| *UHMK1* |  | GC01P162467 |
| *RASD1* |  | GC17M017494 |
| *TAF9* |  | GC05M069364 |
| *KPNA5* |  | GC06P116681 |
| *KPNA6* |  | GC01P032108 |
| *TBL3* |  | GC16P002426 |
| *KLC3* |  | GC19P045333 |
| *RBMS1* |  | GC02M160272 |
| *RAB9A* |  | GC0XP013707 |
| *IVNS1ABP* |  | GC01M185295 |
| *PRR5* |  | GC22P044668 |
| *DNASE2* |  | GC19M012875 |
| *EIF2A* |  | GC03P150546 |
| *RPL23* |  | GC17M038847 |
| *NCBP1* |  | GC09P097633 |
| *NCBP2* |  | GC03M196935 |
| *NAT10* |  | GC11P034105 |
| *HAP1* |  | GC17M041717 |
| *SF3B3* |  | GC16P070523 |
| *DLX2* |  | GC02M172099 |
| *DLX4* |  | GC17P049968 |
| *MT1E* |  | GC16P056625 |
| *HSPA14* |  | GC10P014790 |
| *OTUB1* |  | GC11P063985 |
| *RAB3D* |  | GC19M011322 |
| *SNRPD1* |  | GC18P021612 |
| *RBM28* |  | GC07M128298 |
| *THEM4* |  | GC01M151870 |
| *KRT9* |  | GC17M041565 |
| *USP33* |  | GC01M077695 |
| *VPS39* |  | GC15M042159 |
| *YBX3* |  | GC12M013875 |
| *WLS* |  | GC01M068098 |
| *WDR36* |  | GC05P111091 |
| *LUC7L* |  | GC16M000188 |
| *ASB2* |  | GC14M093934 |
| *MAML3* |  | GC04M139716 |
| *AP2A1* |  | GC19P049766 |
| *FAM120A* |  | GC09P093543 |
| *ASCC3* |  | GC06M100508 |
| *LRRC7* |  | GC01P069567 |
| *ANAPC5* |  | GC12M121308 |
| *ANAPC7* |  | GC12M110372 |
| *ADAP1* |  | GC07M000897 |
| *BYSL* |  | GC06P047504 |
| *MAN2C1* |  | GC15M075355 |
| *FCRL2* |  | GC01M157745 |
| *CDK2AP1* |  | GC12M123260 |
| *CEBPD* |  | GC08M047759 |
| *HNRNPAB* |  | GC05P178204 |
| *HCST* |  | GC19P038242 |
| *MRPL15* |  | GC08P054135 |
| *MRPS17* |  | GC07P055963 |
| *DHX37* |  | GC12M124946 |
| *MRPS2* |  | GC09P135499 |
| *DLG5* |  | GC10M077790 |
| *NACA* |  | GC12M056712 |
| *DBP* |  | GC19M048630 |
| *RFC3* |  | GC13P033818 |
| *RNPS1* |  | GC16M002253 |
| *SIM2* |  | GC21P036699 |
| *SECTM1* |  | GC17M082321 |
| *RSL1D1* |  | GC16M011833 |
| *RPS21* |  | GC20P062387 |
| *NOLC1* |  | GC10P102152 |
| *RPL37A* |  | GC02P216498 |
| *OSBP2* |  | GC22P030693 |
| *SLC28A3* |  | GC09M084319 |
| *NUCB2* |  | GC11P017221 |
| *ILF3* |  | GC19P010625 |
| *LAPTM4A* |  | GC02M020032 |
| *LARP1* |  | GC05P154682 |
| *TSPAN5* |  | GC04M098470 |
| *TTC12* |  | GC11P113314 |
| *RBM15* |  | GC01P110338 |
| *TBX22* |  | GC0XP080014 |
| *STK19* |  | GC06P031971 |
| *ITIH2* |  | GC10P007703 |
| *TWF1* |  | GC12M043793 |
| *LDB2* |  | GC04M016445 |
| *MYCBP* |  | GC01M038862 |
| *MUC4* |  | GC03M195746 |
| *EDC4* |  | GC16P067873 |
| *HBP1* |  | GC07P107168 |
| *HIGD1A* |  | GC03M042782 |
| *MRPL12* |  | GC17P081704 |
| *XAB2* |  | GC19M007619 |
| *YTHDF2* |  | GC01P028751 |
| *GEMIN5* |  | GC05M154887 |
| *CALML5* |  | GC10M005498 |
| *FBXO3* |  | GC11M033740 |
| *BAIAP2L1* |  | GC07M098294 |
| *EXOSC4* |  | GC08P144079 |
| *AP2A2* |  | GC11P000915 |
| *ARL6IP5* |  | GC03P069084 |
| *LUC7L3* |  | GC17P050719 |
| *LY6D* |  | GC08M142784 |
| *LY86* |  | GC06P006588 |
| *AIG1* |  | GC06P143059 |
| *ANKRD13A* |  | GC12P109999 |
| *MBIP* |  | GC14M036298 |
| *FHOD3* |  | GC18P036297 |
| *ATXN2L* |  | GC16P029016 |
| *CYP2A7* |  | GC19M040875 |
| *HOOK2* |  | GC19M012901 |
| *HOXB3* |  | GC17M048548 |
| *CAPRIN1* |  | GC11P034051 |
| *CENPU* |  | GC04M184694 |
| *RHOU* |  | GC01P228644 |
| *HES7* |  | GC17M008120 |
| *CKMT1A* |  | GC15P043693 |
| *CLASP2* |  | GC03M033537 |
| *CGNL1* |  | GC15P057375 |
| *CHST4* |  | GC16P071560 |
| *MRPS23* |  | GC17M057834 |
| *MRPS35* |  | GC12P027710 |
| *MRPS6* |  | GC21P034110 |
| *MUC7* |  | GC04P070430 |
| *MYEF2* |  | GC15M048134 |
| *GPM6B* |  | GC0XM013789 |
| *DDX47* |  | GC12P012814 |
| *MPHOSPH10* |  | GC02P071130 |
| *DAZAP2* |  | GC12P051238 |
| *EIF5B* |  | GC02P099320 |
| *GRIN3A* |  | GC09M101569 |
| *HNRNPUL1* |  | GC19P041262 |
| *SPIN1* |  | GC09P088388 |
| *PDS5A* |  | GC04M039824 |
| *PDZD11* |  | GC0XM070286 |
| *SIAE* |  | GC11M124633 |
| *PPP1R13B* |  | GC14M103733 |
| *PABPC3* |  | GC13P025095 |
| *SNRPB2* |  | GC20P016730 |
| *SNRPG* |  | GC02M070281 |
| *RPS25* |  | GC11M119015 |
| *RPS27L* |  | GC15M064836 |
| *RPL36AL* |  | GC14M049619 |
| *NOM1* |  | GC07P156949 |
| *PLA2G15* |  | GC16P068245 |
| *SLU7* |  | GC05M160401 |
| *PNCK* |  | GC0XM153669 |
| *PLRG1* |  | GC04M154534 |
| *SLC2A11* |  | GC22P023856 |
| *NUDT21* |  | GC16M056429 |
| *NUDT6* |  | GC04M122888 |
| *SRP68* |  | GC17M076038 |
| *ST6GALNAC3* |  | GC01P076074 |
| *TPD52L2* |  | GC20P063865 |
| *TUBA3C* |  | GC13M019173 |
| *U2AF2* |  | GC19P055654 |
| *TRO* |  | GC0XP054920 |
| *PTPMT1* |  | GC11P047568 |
| *STARD10* |  | GC11M072761 |
| *RASSF4* |  | GC10P044959 |
| *TACC2* |  | GC10P121989 |
| *RAP2C* |  | GC0XM132203 |
| *TCF25* |  | GC16P089873 |
| *STAU2* |  | GC08M073386 |
| *SUPT16H* |  | GC14M021351 |
| *TMOD4* |  | GC01M151169 |
| *SOCS4* |  | GC14P055027 |
| *LHX8* |  | GC01P075128 |
| *TWF2* |  | GC03M052228 |
| *MUC6* |  | GC11M001002 |
| *MT1H* |  | GC16P056670 |
| *RPL17* |  | GC18M049488 |
| *NDUFA11* |  | GC19M005891 |
| *S100A16* |  | GC01M153606 |
| *RNASEH2B* |  | GC13P050909 |
| *MRPL11* |  | GC11M066436 |
| *CUL9* |  | GC06P043182 |
| *POLDIP3* |  | GC22M042583 |
| *HTATSF1* |  | GC0XP136497 |
| *RANGRF* |  | GC17P008288 |
| *PACRG* |  | GC06P162727 |
| *RAB21* |  | GC12P071754 |
| *IL37* |  | GC02P115304 |
| *RCL1* |  | GC09P004782 |
| *KRT6C* |  | GC12M052468 |
| *THRAP3* |  | GC01P036224 |
| *WDR11* |  | GC10P120851 |
| *WDR3* |  | GC01P117929 |
| *TRIB1* |  | GC08P125430 |
| *ZNF76* |  | GC06P047434 |
| *YOD1* |  | GC01M207044 |
| *ZNF398* |  | GC07P149126 |
| *FNDC3B* |  | GC03P172039 |
| *CCNB3* |  | GC0XP050202 |
| *CCAR1* |  | GC10P068721 |
| *MAPK8IP2* |  | GC22P050600 |
| *LRCH1* |  | GC13P046553 |
| *LYPD4* |  | GC19M042529 |
| *ATF7IP* |  | GC12P014365 |
| *AMELX* |  | GC0XP011293 |
| *AIF1L* |  | GC09P131098 |
| *ANKFY1* |  | GC17M004163 |
| *ANKRA2* |  | GC05M073552 |
| *EPB41L5* |  | GC02P120013 |
| *BNC1* |  | GC15M083255 |
| *ADAM33* |  | GC20M003596 |
| *ADAMTSL5* |  | GC19M001727 |
| *ACAD11* |  | GC03M132559 |
| *FUT5* |  | GC19M005865 |
| *CRIP2* |  | GC14P105472 |
| *HOMEZ* |  | GC14M023273 |
| *CLEC6A* |  | GC12P008455 |
| *ANKRD17* |  | GC04M073074 |
| *GRSF1* |  | GC04M070815 |
| *GSDMB* |  | GC17M039904 |
| *GTF3A* |  | GC13P027427 |
| *CEP78* |  | GC09P078236 |
| *GTF2A1* |  | GC14M081175 |
| *CCNDBP1* |  | GC15P043185 |
| *RINT1* |  | GC07P105532 |
| *MMS19* |  | GC10M097458 |
| *DRAP1* |  | GC11P065926 |
| *MRPL16* |  | GC11M061281 |
| *MRPL20* |  | GC01M001401 |
| *MRPS11* |  | GC15P088467 |
| *DHX57* |  | GC02M038797 |
| *MRPS18B* |  | GC06P030617 |
| *MRPS31* |  | GC13M040729 |
| *MRPS5* |  | GC02M095230 |
| *GPR108* |  | GC19M006729 |
| *MORC3* |  | GC21P036320 |
| *DDX54* |  | GC12M113157 |
| *DEFA4* |  | GC08M006935 |
| *RNF32* |  | GC07P156640 |
| *NCKAP1L* |  | GC12P054497 |
| *RPL22L1* |  | GC03M170864 |
| *IL17C* |  | GC16P088638 |
| *PFDN6* |  | GC06P033289 |
| *NOP2* |  | GC12M006556 |
| *SETDB2* |  | GC13P049444 |
| *SEC16A* |  | GC09M136440 |
| *SNRNP40* |  | GC01M031259 |
| *SNRPD3* |  | GC22P024555 |
| *PCDH17* |  | GC13P057630 |
| *SART3* |  | GC12M108522 |
| *NKX3-2* |  | GC04M013542 |
| *RPRD1A* |  | GC18M035984 |
| *PKNOX2* |  | GC11P125164 |
| *PNO1* |  | GC02P068157 |
| *PLEKHA5* |  | GC12P019129 |
| *NUDT16* |  | GC03P131381 |
| *PHAX* |  | GC05P126600 |
| *SSBP2* |  | GC05M081413 |
| *IRX2* |  | GC05M002708 |
| *PHF11* |  | GC13P049495 |
| *SRSF11* |  | GC01P070206 |
| *TONSL* |  | GC08M144428 |
| *TNRC6B* |  | GC22P040044 |
| *U2SURP* |  | GC03P142964 |
| *LHX2* |  | GC09P124001 |
| *KDM5D* |  | GC0YM019703 |
| *TADA2A* |  | GC17P037406 |
| *TADA3* |  | GC03M009779 |
| *RANBP10* |  | GC16M067757 |
| *KIR3DL3* |  | GC19P055470 |
| *TBX10* |  | GC11M067631 |
| *TDRD3* |  | GC13P060396 |
| *KCNE4* |  | GC02P223051 |
| *TASP1* |  | GC20M013105 |
| *INTS8* |  | GC08P094813 |
| *ING2* |  | GC04P183504 |
| *LAX1* |  | GC01P203768 |
| *GTF2A2* |  | GC15M059638 |
| *SAP130* |  | GC02M127986 |
| *SAMD9L* |  | GC07M093130 |
| *NOL4* |  | GC18M033851 |
| *MT1B* |  | GC16P056652 |
| *POLR1E* |  | GC09P037490 |
| *PPP6R3* |  | GC11P068460 |
| *PURB* |  | GC07M044879 |
| *REXO4* |  | GC09M133406 |
| *KRT31* |  | GC17M041393 |
| *TIMM13* |  | GC19M002425 |
| *WBP11* |  | GC12M014784 |
| *WDHD1* |  | GC14M054938 |
| *WDR82* |  | GC03M052254 |
| *ZC3H11A* |  | GC01P203795 |
| *ZCCHC7* |  | GC09P037120 |
| *ZNF655* |  | GC07P099559 |
| *ZNF668* |  | GC16M031072 |
| *YTHDF1* |  | GC20M063195 |
| *YTHDF3* |  | GC08P063168 |
| *YTHDC1* |  | GC04M068310 |
| *ZBTB25* |  | GC14M064449 |
| *CCDC136* |  | GC07P129455 |
| *FEV* |  | GC02M218981 |
| *MAL2* |  | GC08P119165 |
| *LZTS2* |  | GC10P100996 |
| *LRRC59* |  | GC17M050375 |
| *BRIX1* |  | GC05P034916 |
| *CROCC* |  | GC01P016798 |
| *HELZ* |  | GC17M067070 |
| *FOXJ2* |  | GC12P008032 |
| *CEP76* |  | GC18M017322 |
| *RHBDD1* |  | GC02P226803 |
| *HMBOX1* |  | GC08P028890 |
| *HACD3* |  | GC15P065530 |
| *CHERP* |  | GC19M016489 |
| *MLLT6* |  | GC17P038705 |
| *DNAJC24* |  | GC11P031349 |
| *MRPL27* |  | GC17M050367 |
| *MRPS14* |  | GC01M175010 |
| *EFHC2* |  | GC0XM044146 |
| *DEDD* |  | GC01M161120 |
| *NDST3* |  | GC04P118033 |
| *CRTAM* |  | GC11P122840 |
| *PDAP1* |  | GC07M099392 |
| *PELI2* |  | GC14P056117 |
| *SPNS1* |  | GC16P029008 |
| *SPATS2L* |  | GC02P200305 |
| *SERF2* |  | GC15P043777 |
| *NPFF* |  | GC12M053516 |
| *PATL1* |  | GC11M059636 |
| *PBX4* |  | GC19M019561 |
| *RRP1B* |  | GC21P043659 |
| *RPL36A* |  | GC0XP101392 |
| *SLBP* |  | GC04M001692 |
| *PLEKHA4* |  | GC19M048837 |
| *PTBP3* |  | GC09M112217 |
| *TNN* |  | GC01P175067 |
| *TSC22D4* |  | GC07M100463 |
| *UBL7* |  | GC15M074446 |
| *KDM8* |  | GC16P027214 |
| *KCTD5* |  | GC16P002682 |
| *KCTD9* |  | GC08M025427 |
| *KCNMB2* |  | GC03P178272 |
| *RBM19* |  | GC12M113816 |
| *TEKT5* |  | GC16M010627 |
| *RCSD1* |  | GC01P167599 |
| *NKAP* |  | GC0XM119958 |
| *SCAF4* |  | GC21M031680 |
| *POLDIP2* |  | GC17M028346 |
| *OTUD3* |  | GC01P019881 |
| *OSGIN1* |  | GC16P083934 |
| *PPP6R1* |  | GC19M055229 |
| *IMP4* |  | GC02P130342 |
| *UTP14A* |  | GC0XP129906 |
| *ZCCHC8* |  | GC12M122472 |
| *MIF4GD* |  | GC17M075266 |
| *ARMC8* |  | GC03P138187 |
| *ANKZF1* |  | GC02P219229 |
| *AGBL3* |  | GC07P134986 |
| *ABHD16A* |  | GC06M032614 |
| *ADGRB1* |  | GC08P142449 |
| *ACTBL2* |  | GC05M057480 |
| *ASPRV1* |  | GC02M069960 |
| *HECTD3* |  | GC01M045002 |
| *COBL* |  | GC07M051016 |
| *MRPL41* |  | GC09P137551 |
| *DPH6* |  | GC15M035217 |
| *MXD3* |  | GC05M177408 |
| *MTUS2* |  | GC13P028820 |
| *CCDC33* |  | GC15P074217 |
| *DEFB119* |  | GC20M031377 |
| *SERGEF* |  | GC11M017767 |
| *NOA1* |  | GC04M056963 |
| *NOC3L* |  | GC10M094333 |
| *SLFN11* |  | GC17M035350 |
| *SRBD1* |  | GC02M045388 |
| *TRPT1* |  | GC11M064223 |
| *URGCP* |  | GC07M043876 |
| *RAVER1* |  | GC19M010316 |
| *TENM4* |  | GC11M078652 |
| *QPCTL* |  | GC19P045692 |
| *STING1* |  | GC05M139476 |
| *THSD7B* |  | GC02P136765 |
| *ZKSCAN4* |  | GC06M028361 |
| *ZNF266* |  | GC19M009412 |
| *UTP18* |  | GC17P051260 |
| *WIZ* |  | GC19M015419 |
| *ZBTB2* |  | GC06M151364 |
| *ZBED1* |  | GC0XM002486 |
| *CCDC12* |  | GC03M046916 |
| *CCDC120* |  | GC0XP049112 |
| *MAP1LC3C* |  | GC01M241995 |
| *FCGR1B* |  | GC01P121087 |
| *FANK1* |  | GC10P125896 |
| *LY6G6D* |  | GC06P031715 |
| *ATP5F1B* |  | GC12M056639 |
| *MAU2* |  | GC19P019320 |
| *CYB5D2* |  | GC17P004143 |
| *CDX4* |  | GC0XP073447 |
| *CEP57L1* |  | GC06P109095 |
| *CEMIP* |  | GC15P080779 |
| *CNOT10* |  | GC03P032685 |
| *MLXIP* |  | GC12P122078 |
| *H3-3B* |  | GC17M075780 |
| *MRPL47* |  | GC03M179588 |
| *MRPL50* |  | GC09M101387 |
| *MRPL54* |  | GC19P003762 |
| *RPF1* |  | GC01P084479 |
| *RPF2* |  | GC06P110982 |
| *HNRNPUL2* |  | GC11M062712 |
| *SPATA5L1* |  | GC15P045402 |
| *PABPC5* |  | GC0XP091434 |
| *SDAD1* |  | GC04M075940 |
| *NOC4L* |  | GC12P132144 |
| *RPS19BP1* |  | GC22M045401 |
| *SLIRP* |  | GC14P077708 |
| *NUDT22* |  | GC11P064226 |
| *NSRP1* |  | GC17P030115 |
| *SRRM2* |  | GC16P004234 |
| *LARP4* |  | GC12P050392 |
| *LARP4B* |  | GC10M000806 |
| *LENG8* |  | GC19P055372 |
| *TRMT2B* |  | GC0XM100992 |
| *TADA1* |  | GC01M166826 |
| *RBM25* |  | GC14P073058 |
| *RBM34* |  | GC01M235131 |
| *RAET1L* |  | GC06M150018 |
| *KBTBD6* |  | GC13M041127 |
| *PSMB11* |  | GC14P025489 |
| *RBM27* |  | GC05P146204 |
| *KRT82* |  | GC12M052393 |
| *ZCCHC4* |  | GC04P025314 |
| *ZNF230* |  | GC19P044002 |
| *ZNF839* |  | GC14P104637 |
| *WRAP73* |  | GC01M003630 |
| *UBOX5* |  | GC20M003088 |
| *GGTLC2* |  | GC22P022644 |
| *GJB7* |  | GC06M087282 |
| *CCDC28A* |  | GC06P138773 |
| *MAP1LC3B2* |  | GC12P116559 |
| *FAM131A* |  | GC03P184335 |
| *GRWD1* |  | GC19P048445 |
| *CEP126* |  | GC11P101916 |
| *MRPL52* |  | GC14P022829 |
| *MRPL53* |  | GC02M074471 |
| *DTWD2* |  | GC05M118836 |
| *RNF217* |  | GC06P124962 |
| *RNF121* |  | GC11P071928 |
| *NOP16* |  | GC05M176383 |
| *PAXBP1* |  | GC21M032734 |
| *NNAT* |  | GC20P037521 |
| *SLFN5* |  | GC17P035243 |
| *SLN* |  | GC11M107709 |
| *NUFIP2* |  | GC17M029970 |
| *SRFBP1* |  | GC05P121961 |
| *SUPT7L* |  | GC02M027650 |
| *TMCO6* |  | GC05P143214 |
| *TMEM102* |  | GC17P008019 |
| *INCA1* |  | GC17M004988 |
| *KRI1* |  | GC19M010553 |
| *WDR55* |  | GC05P143219 |
| *ZCCHC24* |  | GC10M079382 |
| *ZCCHC9* |  | GC05P081301 |
| *ZNF296* |  | GC19M045071 |
| *WBP1L* |  | GC10P102743 |
| *LMBRD2* |  | GC05M036098 |
| *MAGED4B* |  | GC0XM052061 |
| *CCN4* |  | GC08P133192 |
| *FAM193A* |  | GC04P002536 |
| *FAM98A* |  | GC02M033583 |
| *FAM9B* |  | GC0XM009027 |
| *ANAPC15* |  | GC11M072106 |
| *BEX2* |  | GC0XM103309 |
| *C8orf33* |  | GC08P145052 |
| *C19orf53* |  | GC19P013774 |
| *CRACR2B* |  | GC11P000893 |
| *H1-0* |  | GC22P037837 |
| *HMGN5* |  | GC0XM081113 |
| *CMSS1* |  | GC03P099817 |
| *H3C4* |  | GC06M027317 |
| *MT-ATP6* |  | GCMTP008531 |
| *DEFB118* |  | GC20P031370 |
| *NOP9* |  | GC14P024299 |
| *SAXO1* |  | GC09M018858 |
| *OR10J3* |  | GC01M159313 |
| *OR2C3* |  | GC01M247530 |
| *HSFY1* |  | GC0YP018532 |
| *SPTY2D1* |  | GC11M018627 |
| *GYPE* |  | GC04M143870 |
| *ZGRF1* |  | GC04M112539 |
| *TRMT1L* |  | GC01M185088 |
| *METTL11B* |  | GC01P170146 |
| *CAVIN3* |  | GC11M006319 |
| *FMR1NB* |  | GC0XP147981 |
| *GCSAML* |  | GC01P247507 |
| *GTPBP6* |  | GC0XM000306 |
| *H1-6* |  | GC06M027312 |
| *CNOT11* |  | GC02P101252 |
| *CNOT9* |  | GC02P218569 |
| *DEFB127* |  | GC20P000157 |
| *MRM3* |  | GC17P000783 |
| *POTEE* |  | GC02P132746 |
| *NRDC* |  | GC01M051790 |
| *SGF29* |  | GC16P028555 |
| *LILRA3* |  | GC19Mp00270 |
| *ST8SIA6* |  | GC10M017360 |
| *TLE5* |  | GC19M003053 |
| *CACTIN* |  | GC19M003610 |
| *CCZ1B* |  | GC07M006794 |
| *LRMDA* |  | GC10P075432 |
| *FAM185A* |  | GC07P102748 |
| *BLID* |  | GC11M122115 |
| *DEFA1B* |  | GC08M006996 |
| *DEFB126* |  | GC20P000142 |
| *PAGE5* |  | GC0XP055263 |
| *KIAA0040* |  | GC01M175126 |
| *NOL4L* |  | GC20M032443 |
| *KRTAP10-5* |  | GC21M047416 |
| *ZNF679* |  | GC07P064228 |
| *CARD19* |  | GC09P093097 |
| *MAP11* |  | GC07M100291 |
| *H1-10* |  | GC03M129315 |
| *H2BC12* |  | GC06M027294 |
| *IGHA1* |  | GC14M109518 |
| *SLX4IP* |  | GC20P010415 |
| *OBI1* |  | GC13M078615 |
| *HLA-DRB3* |  | GC06Mn03715 |
| *PYM1* |  | GC12M055902 |
| *AFG1L* |  | GC06P108309 |
| *CRYBG1* |  | GC06P106361 |
| *H2AC21* |  | GC01M149970 |
| *H2BC3* |  | GC06M026044 |
| *TASOR2* |  | GC10P005684 |
| *KRTAP10-1* |  | GC21M044538 |
| *KRTAP10-9* |  | GC21P044627 |
| *ZUP1* |  | GC06M116636 |
| *H3C13* |  | GC01M149956 |
| *DMRTC1* |  | GC0XM072872 |
| *DUSP29* |  | GC10M075028 |
| *RADX* |  | GC0XP106612 |
| *MAIP1* |  | GC02P199956 |
| *MCRIP2* |  | GC16P000636 |
| *IHO1* |  | GC03P049201 |
| *ODR4* |  | GC01P186376 |
| *KRTAP10-7* |  | GC21P044600 |
| *CABCOCO1* |  | GC10P061663 |
| *RMC1* |  | GC18P023504 |
| *SPINDOC* |  | GC11P063814 |
| *OR2W5* |  | GC01P247491 |
| *NSUN5P2* |  | GC07M072948 |
| *PPAN-P2RY11* | | GC19P010108 |
| *KRTAP10-3* |  | GC21M044557 |
| *KRTAP10-4* |  | GC21P044573 |
| *ARMH4* |  | GC14M057994 |
| *ANKHD1-EIF4EBP3* | | GC05P143016 |
| *MT1L* |  | GC16P056617 |
| *MIR193B* |  | GC16P014307 |
| *MIR25* |  | GC07M100093 |
| *BLACE* |  | GC07M155356 |
| *ATP5MF-PTCD1* | | GC07M099423 |
| *LINC01558* |  | GC06M167784 |
| *CASC15* |  | GC06P021669 |
| *C11orf98* |  | GC11M063434 |
| *MIR181D* |  | GC19P013874 |
| *ERVK-6* |  | GC07U903184 |
| *ARMCX5-GPRASP2* | | GC0XP102600 |
| *HOXA-AS2* |  | GC07P027107 |
| *MIR520H* |  | GC19P054629 |
| *MIR612* |  | GC11P065788 |
| *SNHG16* |  | GC17P076559 |
| *MIR410* |  | GC14P104807 |
| *MIR652* |  | GC0XP110055 |
| *MIR663B* |  | GC02M132464 |
| *LINC00598* |  | GC13M040082 |
| *FRG1BP* |  | GC20P030378 |
| *MIR1976* |  | GC01P026554 |
| *MIR595* |  | GC07M158532 |
| *MIR509-3* |  | GC0XM147259 |
| *TPTEP2-CSNK1E* | | GC22M046239 |
| *MIR3173* |  | GC14M095137 |
| *MIR448* |  | GC0XP114823 |
| *LINC00260* |  | GC01P203739 |
| *UBL7-AS1* |  | GC15P074461 |
| *ADAM21P1* |  | GC14M070245 |
| *MIR1972-1* |  | GC16M015012 |
| *MIR1972-2* |  | GC16P070030 |
| *GCSAML-AS1* |  | GC01M247524 |
| *MIR665* |  | GC14P104827 |
| *MIR5100* |  | GC10P042998 |
| *TRAJ17* |  | GC14P025251 |
| *LAMP5-AS1* |  | GC20M009505 |
| *ERICH6-AS1* |  | GC03P150703 |
| *MIR1245A* |  | GC02P188978 |
| *MIR1973* |  | GC04P116299 |
| *MMADHC-DT* |  | GC02P149590 |
| *IGHV5-78* |  | GC14M109671 |
| *ITFG2-AS1* |  | GC12M002700 |
| *LINC01934* |  | GC02P181086 |
| *ERVK-18* |  | GC01U903332 |
| *IRS3P* |  | GC07P100570 |
| *ZNF433-AS1* |  | GC19P011988 |
| *RPS4XP13* |  | GC11M057576 |
| *LINC01882* |  | GC18M017384 |
| *BCRP8* |  | GC22M023179 |
| *OR5AL2P* |  | GC11P056395 |
| *IGHV1-12* |  | GC14M106122 |
| *TRAJ15* |  | GC14P022529 |
| *RPL19P16* |  | GC10M121133 |
| *MGC34796* |  | GC01P061654 |
| *IGKDEL* |  | GC02M088834 |
| *RPS3AP24* |  | GC06P140761 |
| *SRIP1* |  | GC04P058103 |
| *IGHV1-67* |  | GC14M106680 |
| *EBVS1* |  | GC01U990038 |
| *FSHMD1A* |  | GC04U990018 |
| *OFC3* |  | GC19U990072 |
| *BCL6-AS1* |  | GC03U903235 |
| *LOC102723724* | | GC06M140845 |
| *LOC112679202* | | GC09P133279 |
| *LOC110599580* | | GC02P038077 |
| *LOC108491832* | | GC22P024894 |
| *LOC107963947* | | GC22P024881 |
| *LOC107966121* | | GC22P024886 |
| *LOC107133517* | | GC03P197898 |
| *LOC107195252* | | GC10P092692 |
| *LOC106728418* | | GC07P128238 |
| *LOC107126288* | | GC07P027302 |
| *LOC107648866* | | GC06P047867 |
| *LOC107832851* | | GC10P067881 |
| *GRM1* |  | GC06P145973 |
| *PIK3C3* |  | GC18P041955 |
| *FAAH* |  | GC01P046394 |
| *PDX1* |  | GC13P027921 |
| *IMPDH2* |  | GC03M049253 |
| *CES1* |  | GC16M055836 |
| *CFI* |  | GC04M109740 |
| *NPPA* |  | GC01M011846 |
| *UCP2* |  | GC11M073974 |
| *GFRA1* |  | GC10M116056 |
| *TNK2* |  | GC03M195863 |
| *CLOCK* |  | GC04M055427 |
| *CD2AP* |  | GC06P047777 |
| *NUMA1* |  | GC11M072002 |
| *TRAP1* |  | GC16M003652 |
| *LCN2* |  | GC09P128149 |
| *CUL2* |  | GC10M035046 |
| *LRIG1* |  | GC03M066429 |
| *FOSB* |  | GC19P045467 |
| *CLDN4* |  | GC07P073799 |
| *CLDN5* |  | GC22M019523 |
| *CDC37* |  | GC19M010391 |
| *UBE3C* |  | GC07P157138 |
| *MTA2* |  | GC11M063413 |
| *DTX2* |  | GC07P076461 |
| *NFRKB* |  | GC11M129863 |
| *LILRB4* |  | GC19P054643 |
| *STAB1* |  | GC03P052495 |
| *PTPN23* |  | GC03P047397 |
| *ERRFI1* |  | GC01M008004 |
| *BTBD10* |  | GC11M013387 |
| *INSM1* |  | GC20P020368 |
| *CASKIN1* |  | GC16M002177 |
| *DTX3* |  | GC12P057604 |
| *KCNRG* |  | GC13P050015 |
| *ELOC* |  | GC08M073939 |
| *PIMREG* |  | GC17P006444 |
| *IGHV1-69* |  | GC14M109641 |
| *MIR340* |  | GC05M180015 |
| *MCTS2P* |  | GC20P031547 |
| *RPL13P2* |  | GC20P046099 |
| *MYLK* |  | GC03M123610 |
| *CFTR* |  | GC07P117287 |
| *PHGDH* |  | GC01P119660 |
| *GYS1* |  | GC19M048970 |
| *MDH2* |  | GC07P076048 |
| *MFN2* |  | GC01P011980 |
| *SLC2A2* |  | GC03M170996 |
| *KRT18* |  | GC12P052948 |
| *WNT10B* |  | GC12M048965 |
| *GJB2* |  | GC13M020187 |
| *GNAI2* |  | GC03P050226 |
| *CTNNA1* |  | GC05P138613 |
| *PROS1* |  | GC03M093873 |
| *PDK1* |  | GC02P172555 |
| *KRT8* |  | GC12M052897 |
| *WNT1* |  | GC12P049053 |
| *CAMK4* |  | GC05P111223 |
| *CCKAR* |  | GC04M026483 |
| *AQP4* |  | GC18M026852 |
| *DPYSL2* |  | GC08P026514 |
| *LNPEP* |  | GC05P096935 |
| *SCARB1* |  | GC12M124776 |
| *RPS6KA5* |  | GC14M090847 |
| *UMPS* |  | GC03P124730 |
| *PIK3R5* |  | GC17M008878 |
| *ADM* |  | GC11P010304 |
| *FGF3* |  | GC11M069811 |
| *AMPH* |  | GC07M038666 |
| *GAK* |  | GC04M000849 |
| *FMR1* |  | GC0XP147913 |
| *MMP17* |  | GC12P131828 |
| *GRB7* |  | GC17P039744 |
| *CRH* |  | GC08M066176 |
| *POLR2A* |  | GC17P008025 |
| *SLC20A1* |  | GC02P115301 |
| *DUSP10* |  | GC01M221701 |
| *CUL5* |  | GC11P108008 |
| *RNASEL* |  | GC01M182542 |
| *PYGB* |  | GC20P025248 |
| *WNT2B* |  | GC01P112466 |
| *ANP32A* |  | GC15M068778 |
| *AMH* |  | GC19P002251 |
| *FOXA1* |  | GC14M037589 |
| *RGS4* |  | GC01P163038 |
| *CDC14A* |  | GC01P100351 |
| *EIF2B5* |  | GC03P184135 |
| *POLR3A* |  | GC10M077969 |
| *PIK3R3* |  | GC01M046041 |
| *NOX4* |  | GC11M089324 |
| *SEPHS1* |  | GC10M013317 |
| *SUMO3* |  | GC21M044805 |
| *EFNA4* |  | GC01P155063 |
| *ARHGEF9* |  | GC0XM063634 |
| *BACH1* |  | GC21P029194 |
| *MARK1* |  | GC01P220528 |
| *ARHGEF6* |  | GC0XM136665 |
| *MBD3* |  | GC19M001750 |
| *C4B* |  | GC06P032014 |
| *CYB561* |  | GC17M063432 |
| *PABPC1* |  | GC08M100685 |
| *SLC2A6* |  | GC09M133471 |
| *RAB35* |  | GC12M120096 |
| *POLG2* |  | GC17M064477 |
| *USP22* |  | GC17M020999 |
| *APEH* |  | GC03P049673 |
| *MEP1B* |  | GC18P032185 |
| *HOXD10* |  | GC02P176108 |
| *RGS5* |  | GC01M163111 |
| *DDX4* |  | GC05P055738 |
| *IL33* |  | GC09P006206 |
| *S100A2* |  | GC01M153561 |
| *ZBTB7B* |  | GC01P155002 |
| *MAGED2* |  | GC0XP054807 |
| *MTIF2* |  | GC02M055236 |
| *MYBPC2* |  | GC19P050432 |
| *PRSS2* |  | GC07P144959 |
| *NPLOC4* |  | GC17M081556 |
| *IFNW1* |  | GC09M021103 |
| *INA* |  | GC10P103277 |
| *NCAPG* |  | GC04P017812 |
| *LRRFIP1* |  | GC02P237627 |
| *ACR* |  | GC22P050738 |
| *HOXA6* |  | GC07M027145 |
| *DCP1A* |  | GC03M053301 |
| *ST13* |  | GC22M045406 |
| *STAP2* |  | GC19M004324 |
| *FMNL2* |  | GC02P152335 |
| *CHST2* |  | GC03P143119 |
| *DENR* |  | GC12P122752 |
| *PPP4R1* |  | GC18M009546 |
| *UCN* |  | GC02M027308 |
| *UCKL1* |  | GC20M063939 |
| *TRIM62* |  | GC01M033147 |
| *SAMSN1* |  | GC21M014485 |
| *KRT74* |  | GC12M052565 |
| *EXOC3* |  | GC05P000443 |
| *IPO8* |  | GC12M030628 |
| *PCSK4* |  | GC19M001481 |
| *CENPM* |  | GC22M045414 |
| *KRT75* |  | GC12M052425 |
| *TIMD4* |  | GC05M156919 |
| *FYB1* |  | GC05M039105 |
| *RSF1* |  | GC11M077659 |
| *RTKN2* |  | GC10M062183 |
| *SMC6* |  | GC02M017708 |
| *UFD1* |  | GC22M019450 |
| *PLAC1* |  | GC0XM134565 |
| *FRY* |  | GC13P031852 |
| *MMP26* |  | GC11P004706 |
| *MS4A4A* |  | GC11P060185 |
| *ROMO1* |  | GC20P035699 |
| *PCNP* |  | GC03P101574 |
| *PILRB* |  | GC07P100353 |
| *CACUL1* |  | GC10M118674 |
| *C10orf90* |  | GC10M126424 |
| *H3C1* |  | GC06P026040 |
| *XAGE1B* |  | GC0XM052513 |
| *MIR185* |  | GC22P020034 |
| *MIR942* |  | GC01P117094 |
| *MIR1204* |  | GC08P127795 |
| *MIR1205* |  | GC08P127960 |
| *LINC01541* |  | GC18M071519 |
| *IGHD1-1* |  | GC14M109573 |
| *ARAFP2* |  | GC07M063404 |
| *ARAFP3* |  | GC07P064620 |
| *FRA10F* |  | GC10U990022 |
| *LOC110806262* | | GC17P030235 |
| *LOC111099027* | | GC21P041485 |
| *LOC111099028* | | GC21P038454 |
| *ADK* |  | GC10P074152 |
| *GCK* |  | GC07M044145 |
| *CAMK2B* |  | GC07M044217 |
| *DYRK1A* |  | GC21P037365 |
| *NEK2* |  | GC01M211658 |
| *PFKM* |  | GC12P048105 |
| *ATP1A1* |  | GC01P116372 |
| *PSEN2* |  | GC01P226870 |
| *INPPL1* |  | GC11P072223 |
| *CACNA1C* |  | GC12P001970 |
| *PRKCI* |  | GC03P170222 |
| *PDE3A* |  | GC12P020294 |
| *NMNAT1* |  | GC01P009944 |
| *IMPDH1* |  | GC07M128392 |
| *TNC* |  | GC09M115019 |
| *KEAP1* |  | GC19M010486 |
| *VRK1* |  | GC14P096797 |
| *MCM4* |  | GC08P047965 |
| *GCGR* |  | GC17P081804 |
| *GNRHR* |  | GC04M067737 |
| *GNB3* |  | GC12P006839 |
| *GJB1* |  | GC0XP071215 |
| *LRP1* |  | GC12P057128 |
| *ATP7B* |  | GC13M051930 |
| *FER* |  | GC05P108747 |
| *ADORA2B* |  | GC17P015927 |
| *FTL* |  | GC19P048965 |
| *FGF8* |  | GC10M101770 |
| *CTSH* |  | GC15M078925 |
| *HEXB* |  | GC05P074640 |
| *HADHB* |  | GC02P026243 |
| *MMP19* |  | GC12M055835 |
| *GRIK2* |  | GC06P101181 |
| *GRM5* |  | GC11M088504 |
| *DCN* |  | GC12M091140 |
| *PRNP* |  | GC20P004686 |
| *PLCB4* |  | GC20P009024 |
| *SLC18A2* |  | GC10P117241 |
| *PIK3C2B* |  | GC01M204422 |
| *LAMB1* |  | GC07M107923 |
| *TUBG1* |  | GC17P042609 |
| *TALDO1* |  | GC11P000749 |
| *TSHR* |  | GC14P080954 |
| *ROCK2* |  | GC02M011192 |
| *COL1A2* |  | GC07P094394 |
| *SPTLC1* |  | GC09M092002 |
| *GLP1R* |  | GC06P039048 |
| *GNAI3* |  | GC01P109548 |
| *CACNA1E* |  | GC01P181317 |
| *MAP2K4* |  | GC17P012020 |
| *ETV1* |  | GC07M013891 |
| *MTNR1B* |  | GC11P092969 |
| *GP9* |  | GC03P130615 |
| *SLC12A2* |  | GC05P128083 |
| *DCTN1* |  | GC02M074361 |
| *PYGM* |  | GC11M064746 |
| *CBR1* |  | GC21P036069 |
| *F2RL3* |  | GC19P016888 |
| *MAP3K12* |  | GC12M053479 |
| *ARG2* |  | GC14P067619 |
| *AGXT* |  | GC02P240868 |
| *ACLY* |  | GC17M041866 |
| *A2M* |  | GC12M009067 |
| *HEXA* |  | GC15M072340 |
| *GRM3* |  | GC07P086643 |
| *CALM1* |  | GC14P090396 |
| *NQO2* |  | GC06P003009 |
| *PPP2R2B* |  | GC05M146582 |
| *PDE1C* |  | GC07M031616 |
| *SLC26A3* |  | GC07M107765 |
| *PTPRB* |  | GC12M070516 |
| *TNFRSF21* |  | GC06M047231 |
| *LAMC2* |  | GC01P183155 |
| *TUBB4A* |  | GC19M006496 |
| *ULK1* |  | GC12P131894 |
| *UBE2B* |  | GC05P134371 |
| *RASGRP2* |  | GC11M064726 |
| *RAP1B* |  | GC12P068610 |
| *TJP2* |  | GC09P069121 |
| *PSMB4* |  | GC01P151372 |
| *POLG* |  | GC15M089316 |
| *GCNT2* |  | GC06P010492 |
| *GALR1* |  | GC18P077250 |
| *GNB5* |  | GC15M060668 |
| *CACNA1I* |  | GC22P039570 |
| *FABP4* |  | GC08M081478 |
| *MAP3K2* |  | GC02M127298 |
| *B4GALT1* |  | GC09M033100 |
| *ACO1* |  | GC09P032374 |
| *MFGE8* |  | GC15M088898 |
| *CYB5A* |  | GC18M074250 |
| *CYP2C18* |  | GC10P094684 |
| *CYP2J2* |  | GC01M059893 |
| *EPHB3* |  | GC03P184561 |
| *CLCN1* |  | GC07P143316 |
| *EFNA3* |  | GC01P155078 |
| *GREM1* |  | GC15P032720 |
| *EIF2B4* |  | GC02M027364 |
| *CNTN1* |  | GC12P040692 |
| *SEC24C* |  | GC10P073744 |
| *PABPN1* |  | GC14P025379 |
| *PRMT7* |  | GC16P068339 |
| *SCN3B* |  | GC11M123629 |
| *SCN4A* |  | GC17M063938 |
| *OPA1* |  | GC03P193594 |
| *SLC5A6* |  | GC02M027201 |
| *SMS* |  | GC0XP021958 |
| *SLC8A1* |  | GC02M040078 |
| *NSDHL* |  | GC0XP152830 |
| *SLC15A1* |  | GC13M098683 |
| *PTGFR* |  | GC01P078303 |
| *PIK3C2G* |  | GC12P018242 |
| *LAMP2* |  | GC0XM120426 |
| *LAMA4* |  | GC06M112107 |
| *REST* |  | GC04P056907 |
| *KLF6* |  | GC10M003779 |
| *SULT2A1* |  | GC19M047870 |
| *TMPRSS2* |  | GC21M041464 |
| *PRPH* |  | GC12P049293 |
| *CAPN5* |  | GC11P077066 |
| *GBF1* |  | GC10P102245 |
| *CAV3* |  | GC03P008733 |
| *GHRHR* |  | GC07P030978 |
| *ARHGAP1* |  | GC11M061106 |
| *A4GALT* |  | GC22M042692 |
| *FUT8* |  | GC14P065411 |
| *CYFIP2* |  | GC05P157244 |
| *CYP2S1* |  | GC19P041193 |
| *GDA* |  | GC09P072114 |
| *COQ7* |  | GC16P019067 |
| *HLCS* |  | GC21M036750 |
| *MLF1* |  | GC03P158571 |
| *DPP6* |  | GC07P153748 |
| *DUOX2* |  | GC15M045092 |
| *EFNA1* |  | GC01P155127 |
| *GPX7* |  | GC01P052602 |
| *DCLK1* |  | GC13M035768 |
| *NEK1* |  | GC04M169393 |
| *RGS2* |  | GC01P192809 |
| *SPINK1* |  | GC05M147825 |
| *SH2B1* |  | GC16P029024 |
| *SEC23A* |  | GC14M039031 |
| *SEC63* |  | GC06M107867 |
| *NPHP1* |  | GC02M110122 |
| *HTR2B* |  | GC02M231108 |
| *HTT* |  | GC04P003041 |
| *PDE1B* |  | GC12P054549 |
| *PLA2G12A* |  | GC04M109712 |
| *SLIT1* |  | GC10M096998 |
| *SLC8A3* |  | GC14M070044 |
| *POLR2E* |  | GC19M001086 |
| *SLC39A14* |  | GC08P022367 |
| *SLC16A7* |  | GC12P059596 |
| *SSTR1* |  | GC14P038207 |
| *TRAF4* |  | GC17P028771 |
| *UGT1A9* |  | GC02P233671 |
| *UBA2* |  | GC19P034428 |
| *LEFTY2* |  | GC01M225937 |
| *UBQLN1* |  | GC09M083659 |
| *KIF2C* |  | GC01P044739 |
| *RAB10* |  | GC02P026033 |
| *KCNA4* |  | GC11M030009 |
| *KCNC1* |  | GC11P017756 |
| *NOL3* |  | GC16P067174 |
| *POLL* |  | GC10M101578 |
| *HYOU1* |  | GC11M119045 |
| *SULT1A1* |  | GC16M028606 |
| *VANGL1* |  | GC01P115641 |
| *VAPA* |  | GC18P009904 |
| *GDF2* |  | GC10P047322 |
| *CACNB1* |  | GC17M039173 |
| *ATP8A1* |  | GC04M042410 |
| *ASRGL1* |  | GC11P062337 |
| *CRHR2* |  | GC07M030651 |
| *ROBO2* |  | GC03P075955 |
| *CALD1* |  | GC07P134744 |
| *NDUFB3* |  | GC02P201071 |
| *PEX5* |  | GC12P008247 |
| *PPP1R3A* |  | GC07M113876 |
| *PSMC1* |  | GC14P090256 |
| *INHBB* |  | GC02P120349 |
| *TOPORS* |  | GC09M032540 |
| *ITGA11* |  | GC15M068296 |
| *EFNB3* |  | GC17P008051 |
| *HAPLN1* |  | GC05M083637 |
| *SULT1A2* |  | GC16M028591 |
| *JMJD6* |  | GC17M076718 |
| *TFB1M* |  | GC06M155247 |
| *CADPS* |  | GC03M062398 |
| *GIPC1* |  | GC19M014450 |
| *ATG3* |  | GC03M112532 |
| *MANBA* |  | GC04M102631 |
| *ARR3* |  | GC0XP070269 |
| *APLP2* |  | GC11P130069 |
| *ARHGEF3* |  | GC03M056736 |
| *ASH1L* |  | GC01M155335 |
| *ERP44* |  | GC09M099979 |
| *ANO1* |  | GC11P069986 |
| *BMP15* |  | GC0XP050910 |
| *BIRC6* |  | GC02P032357 |
| *FLVCR2* |  | GC14P075578 |
| *FMO4* |  | GC01P171315 |
| *CTNND2* |  | GC05M010971 |
| *CTHRC1* |  | GC08P103371 |
| *CLCF1* |  | GC11M067364 |
| *DNAL4* |  | GC22M038778 |
| *DHPS* |  | GC19M012684 |
| *CDCA8* |  | GC01P037692 |
| *DECR1* |  | GC08P090001 |
| *MR1* |  | GC01P181033 |
| *GRAP* |  | GC17M019883 |
| *RND3* |  | GC02M150468 |
| *NDC80* |  | GC18P002571 |
| *EMG1* |  | GC12P006970 |
| *COPA* |  | GC01M160288 |
| *IL1RL2* |  | GC02P102186 |
| *NRG3* |  | GC10P083672 |
| *NPHS2* |  | GC01M179519 |
| *SDCCAG8* |  | GC01P243255 |
| *SBF1* |  | GC22M050445 |
| *ENAH* |  | GC01M225486 |
| *SMARCD3* |  | GC07M151238 |
| *SIRT7* |  | GC17M081911 |
| *NR2E3* |  | GC15P071792 |
| *PSME1* |  | GC14P024136 |
| *TOP1MT* |  | GC08M143304 |
| *LARP7* |  | GC04P112636 |
| *TTPA* |  | GC08M063048 |
| *UBE2M* |  | GC19M058555 |
| *LGR6* |  | GC01P202193 |
| *KDM3A* |  | GC02P086440 |
| *KDM4A* |  | GC01P043650 |
| *RELT* |  | GC11P073376 |
| *KLC1* |  | GC14P104644 |
| *KCNH3* |  | GC12P049539 |
| *PCSK5* |  | GC09P075890 |
| *SOCS6* |  | GC18P070288 |
| *SORBS1* |  | GC10M095311 |
| *SCTR* |  | GC02M119439 |
| *POMP* |  | GC13P028659 |
| *SYNGR1* |  | GC22P039350 |
| *RALGDS* |  | GC09M133097 |
| *ST8SIA1* |  | GC12M022063 |
| *UGT1A4* |  | GC02P233718 |
| *WNT9B* |  | GC17P046833 |
| *WNT6* |  | GC02P218859 |
| *ABCB9* |  | GC12M122920 |
| *GNG5* |  | GC01M084498 |
| *GNG7* |  | GC19M002511 |
| *CBX1* |  | GC17M048070 |
| *GORASP1* |  | GC03M039096 |
| *FBXO32* |  | GC08M123498 |
| *ARPC1A* |  | GC07P099325 |
| *APLP1* |  | GC19P038238 |
| *EXOC4* |  | GC07P133253 |
| *FARP2* |  | GC02P241357 |
| *LRRC4C* |  | GC11M040109 |
| *ASF1B* |  | GC19M014119 |
| *ALDH1L2* |  | GC12M105019 |
| *AGR2* |  | GC07M016832 |
| *MEGF10* |  | GC05P127228 |
| *MCM8* |  | GC20P005963 |
| *MED17* |  | GC11P093784 |
| *FKBP14* |  | GC07M030010 |
| *FKBP1B* |  | GC02P024033 |
| *MBD1* |  | GC18M050266 |
| *ARAP1* |  | GC11M072686 |
| *ESM1* |  | GC05M054977 |
| *CXCL2* |  | GC04M074097 |
| *CRB2* |  | GC09P123356 |
| *CLDN3* |  | GC07M073768 |
| *CLDN6* |  | GC16M003014 |
| *CDK19* |  | GC06M110609 |
| *CEP55* |  | GC10P093496 |
| *RHOBTB2* |  | GC08P022987 |
| *DEPTOR* |  | GC08P119873 |
| *MYOF* |  | GC10M093306 |
| *MYH1* |  | GC17M010492 |
| *MORC2* |  | GC22M030925 |
| *DPP9* |  | GC19M004675 |
| *CRHBP* |  | GC05P076952 |
| *RGS19* |  | GC20M064073 |
| *PCSK6* |  | GC15M101297 |
| *IL27RA* |  | GC19P014031 |
| *PDSS2* |  | GC06M107152 |
| *NPSR1* |  | GC07P034664 |
| *SKAP1* |  | GC17M048133 |
| *SKAP2* |  | GC07M026654 |
| *PLEKHG5* |  | GC01M006466 |
| *PRELP* |  | GC01P203444 |
| *SLC39A5* |  | GC12P056248 |
| *SENP2* |  | GC03P185582 |
| *INPP5J* |  | GC22P031109 |
| *IQGAP3* |  | GC01M156525 |
| *PTPRR* |  | GC12M070638 |
| *UGT2B17* |  | GC04M068537 |
| *LIN28A* |  | GC01P026410 |
| *RARRES1* |  | GC03M158696 |
| *KCNC2* |  | GC12M075040 |
| *STX7* |  | GC06M132404 |
| *RAD9A* |  | GC11P067318 |
| *THOC2* |  | GC0XM123600 |
| *ZNF331* |  | GC19P053521 |
| *ZBTB20* |  | GC03M114315 |
| *LMO7* |  | GC13P075620 |
| *GNG4* |  | GC01M235547 |
| *CD177* |  | GC19P043353 |
| *LRP1B* |  | GC02M140231 |
| *LRG1* |  | GC19M004538 |
| *FAIM* |  | GC03P138608 |
| *MEST* |  | GC07P130486 |
| *ABCF2* |  | GC07M151211 |
| *ACTL6A* |  | GC03P179562 |
| *GADD45B* |  | GC19P002476 |
| *C2CD3* |  | GC11M074012 |
| *FSCN2* |  | GC17P081517 |
| *LRRTM4* |  | GC02M076709 |
| *CWF19L1* |  | GC10M100232 |
| *CTF1* |  | GC16P030910 |
| *BTN3A1* |  | GC06P026402 |
| *GBX2* |  | GC02M236165 |
| *CDK18* |  | GC01P205504 |
| *GTF2F1* |  | GC19M006381 |
| *CKMT1B* |  | GC15P043593 |
| *RIOK2* |  | GC05M097160 |
| *DNER* |  | GC02M229357 |
| *MRPS7* |  | GC17P075262 |
| *GPR12* |  | GC13M026755 |
| *GPR158* |  | GC10P025174 |
| *DDX10* |  | GC11P108569 |
| *RNF41* |  | GC12M056202 |
| *MRC1* |  | GC10P017809 |
| *RFFL* |  | GC17M035006 |
| *DACH1* |  | GC13M071437 |
| *ELAVL4* |  | GC01P050025 |
| *NELL1* |  | GC11P020647 |
| *NELL2* |  | GC12M044509 |
| *CPNE3* |  | GC08P086514 |
| *PSG1* |  | GC19M042866 |
| *IL18BP* |  | GC11P071998 |
| *PELP1* |  | GC17M004669 |
| *IL22RA2* |  | GC06M137143 |
| *NPTXR* |  | GC22M038818 |
| *PARVB* |  | GC22P043999 |
| *IFIT1* |  | GC10P089396 |
| *IFIT2* |  | GC10P089284 |
| *IFIT3* |  | GC10P089327 |
| *PRICKLE2* |  | GC03M064079 |
| *SAA4* |  | GC11M018234 |
| *RTKN* |  | GC02M074477 |
| *SMYD1* |  | GC02P088068 |
| *SMNDC1* |  | GC10M110290 |
| *SLC17A9* |  | GC20P062952 |
| *NPRL2* |  | GC03M050380 |
| *SLC15A2* |  | GC03P121894 |
| *PIK3AP1* |  | GC10M096593 |
| *PSMD8* |  | GC19P038374 |
| *TOR1AIP1* |  | GC01P179882 |
| *TXNDC5* |  | GC06M007893 |
| *PVALB* |  | GC22M036800 |
| *KIFC1* |  | GC06P033391 |
| *TBL2* |  | GC07M073568 |
| *RCC2* |  | GC01M017406 |
| *STAB2* |  | GC12P103587 |
| *PSD* |  | GC10M102403 |
| *DACT1* |  | GC14P058633 |
| *PLA2R1* |  | GC02M159932 |
| *PIP4K2C* |  | GC12P057591 |
| *TGS1* |  | GC08P055773 |
| *TIMELESS* |  | GC12M056416 |
| *USP53* |  | GC04P119212 |
| *TRIM11* |  | GC01M228393 |
| *WIPI1* |  | GC17M068420 |
| *BBS7* |  | GC04M121824 |
| *EVC* |  | GC04P005712 |
| *LRRFIP2* |  | GC03M037052 |
| *ABCE1* |  | GC04P145097 |
| *ABI3* |  | GC17P049210 |
| *CYGB* |  | GC17M076527 |
| *GIMAP4* |  | GC07P150568 |
| *GTPBP1* |  | GC22P038705 |
| *RGS3* |  | GC09P114824 |
| *DKK4* |  | GC08M042373 |
| *GPX5* |  | GC06P028525 |
| *DDX39A* |  | GC19M014408 |
| *RNLS* |  | GC10M088180 |
| *SIGLEC12* |  | GC19M051491 |
| *SCG5* |  | GC15P032641 |
| *SCGN* |  | GC06P025652 |
| *SAP30* |  | GC04P173369 |
| *NMU* |  | GC04M055595 |
| *PLCH1* |  | GC03M155381 |
| *OLIG1* |  | GC21P033070 |
| *NTMT1* |  | GC09P129608 |
| *PTGFRN* |  | GC01P116910 |
| *TOE1* |  | GC01P045339 |
| *TDRKH* |  | GC01M151815 |
| *RCVRN* |  | GC17M009896 |
| *CUEDC2* |  | GC10M102424 |
| *RCE1* |  | GC11P066842 |
| *THOC6* |  | GC16P003024 |
| *USP39* |  | GC02P085637 |
| *ZNF23* |  | GC16M071463 |
| *USO1* |  | GC04P075724 |
| *ZBTB24* |  | GC06M109462 |
| *ABO* |  | GC09M133250 |
| *GATAD2A* |  | GC19P023337 |
| *MIA3* |  | GC01P222618 |
| *GLG1* |  | GC16M074448 |
| *MARCKSL1* |  | GC01M032334 |
| *ESPN* |  | GC01P006484 |
| *ARL2BP* |  | GC16P057245 |
| *ATMIN* |  | GC16P081035 |
| *ASCL2* |  | GC11M002269 |
| *MED6* |  | GC14M070581 |
| *ACKR1* |  | GC01P159203 |
| *CTR9* |  | GC11P010772 |
| *APBA1* |  | GC09M069427 |
| *ANO2* |  | GC12M005532 |
| *CIR1* |  | GC02M174348 |
| *RIN3* |  | GC14P092513 |
| *CHMP7* |  | GC08P023243 |
| *DNAJC13* |  | GC03P132417 |
| *DNAJC15* |  | GC13P043023 |
| *MRPL17* |  | GC11M006659 |
| *MRPL19* |  | GC02P075646 |
| *DIDO1* |  | GC20M062877 |
| *DHDH* |  | GC19P048933 |
| *DPM2* |  | GC09M127935 |
| *MTCH1* |  | GC06M042233 |
| *GPRC5D* |  | GC12M012940 |
| *CCDC40* |  | GC17P080037 |
| *CDC42BPG* |  | GC11M064823 |
| *CDH22* |  | GC20M046173 |
| *MPP2* |  | GC17M043875 |
| *DDX31* |  | GC09M132499 |
| *MPRIP* |  | GC17P017042 |
| *ELF5* |  | GC11M034500 |
| *PFDN1* |  | GC05M140254 |
| *SDF4* |  | GC01M001216 |
| *PNOC* |  | GC08P028316 |
| *OSBPL8* |  | GC12M076354 |
| *PMEPA1* |  | GC20M057648 |
| *OMP* |  | GC11P077102 |
| *PTMS* |  | GC12P006765 |
| *PIP* |  | GC07P143132 |
| *UGGT1* |  | GC02P128091 |
| *UFC1* |  | GC01P161142 |
| *SYNM* |  | GC15P099098 |
| *JAKMIP1* |  | GC04M006026 |
| *TRPM5* |  | GC11M002425 |
| *COL19A1* |  | GC06P069866 |
| *GSPT2* |  | GC0XP051743 |
| *POU6F2* |  | GC07P038977 |
| *RALGAPA2* |  | GC20M020374 |
| *PPP2R5B* |  | GC11P064918 |
| *USP49* |  | GC06M042304 |
| *WDR1* |  | GC04M010075 |
| *ZKSCAN1* |  | GC07P100015 |
| *ZKSCAN5* |  | GC07P099504 |
| *ZBTB32* |  | GC19P038226 |
| *EYS* |  | GC06M063719 |
| *ATG14* |  | GC14M055366 |
| *MACC1* |  | GC07M020140 |
| *AEN* |  | GC15P088604 |
| *MDGA2* |  | GC14M046839 |
| *FMNL3* |  | GC12M049636 |
| *FTSJ3* |  | GC17M063819 |
| *FRS3* |  | GC06M042298 |
| *FCRL3* |  | GC01M157674 |
| *CLDN9* |  | GC16P003012 |
| *CLEC2D* |  | GC12P010154 |
| *GIMAP6* |  | GC07M150625 |
| *GIMAP7* |  | GC07P150514 |
| *GPR26* |  | GC10P123666 |
| *GTF3C1* |  | GC16M027471 |
| *DERL3* |  | GC22M023834 |
| *MUC13* |  | GC03M124905 |
| *GPR162* |  | GC12P006821 |
| *MPP7* |  | GC10M028057 |
| *IKZF4* |  | GC12P056007 |
| *IFRD2* |  | GC03M050287 |
| *PRELID1* |  | GC05P177305 |
| *ODF1* |  | GC08P102569 |
| *TENM3* |  | GC04P181448 |
| *UBLCP1* |  | GC05P159263 |
| *TRMT10C* |  | GC03P101561 |
| *URI1* |  | GC19P029923 |
| *SYT9* |  | GC11P007238 |
| *RAB15* |  | GC14M064945 |
| *SURF6* |  | GC09M133331 |
| *TMBIM6* |  | GC12P049707 |
| *HUNK* |  | GC21P031873 |
| *SCUBE1* |  | GC22M043197 |
| *RAB3C* |  | GC05P058582 |
| *JAGN1* |  | GC03P009890 |
| *ZFYVE21* |  | GC14P103715 |
| *ZNF350* |  | GC19M051965 |
| *ZNF268* |  | GC12P133181 |
| *ZRANB1* |  | GC10P124941 |
| *VPS37C* |  | GC11M061130 |
| *UST* |  | GC06P148721 |
| *LMAN1L* |  | GC15P074812 |
| *LINGO2* |  | GC09M027940 |
| *ZBTB43* |  | GC09P126805 |
| *MIIP* |  | GC01P012019 |
| *GNRH2* |  | GC20P003080 |
| *B4GAT1* |  | GC11M066345 |
| *FILIP1L* |  | GC03M099830 |
| *ASXL3* |  | GC18P033578 |
| *AHRR* |  | GC05P000278 |
| *GADD45GIP1* |  | GC19M012953 |
| *MGA* |  | GC15P041621 |
| *MAP1S* |  | GC19P023311 |
| *CPNE8* |  | GC12M038646 |
| *CLDN8* |  | GC21M030214 |
| *GIMAP2* |  | GC07P150686 |
| *CELA2B* |  | GC01P015465 |
| *GSX1* |  | GC13P027792 |
| *CMTR1* |  | GC06P047474 |
| *MMUT* |  | GC06M049430 |
| *DNAJC11* |  | GC01M006634 |
| *MRPL38* |  | GC17M075900 |
| *MRPS15* |  | GC01M036455 |
| *DNAH10* |  | GC12P123762 |
| *EFCAB6* |  | GC22M045427 |
| *GPX6* |  | GC06M028503 |
| *MON2* |  | GC12P062466 |
| *MNS1* |  | GC15M056421 |
| *RNF115* |  | GC01M145738 |
| *NEMF* |  | GC14M049782 |
| *NELFB* |  | GC09P137255 |
| *PFN4* |  | GC02M024115 |
| *SPACA3* |  | GC17P032971 |
| *SPATA6* |  | GC01M048260 |
| *NPY4R* |  | GC10M046461 |
| *SOX7* |  | GC08M010723 |
| *PDCD7* |  | GC15M065117 |
| *SCGB3A1* |  | GC05M180590 |
| *NLRP11* |  | GC19M055785 |
| *PLD5* |  | GC01M242082 |
| *SLC46A2* |  | GC09M112878 |
| *NUPR1* |  | GC16M028548 |
| *SLC50A1* |  | GC01P155135 |
| *SGCZ* |  | GC08M014089 |
| *PTPRCAP* |  | GC11M067452 |
| *TCTE1* |  | GC06M044278 |
| *TRIM6* |  | GC11P005596 |
| *TRIAP1* |  | GC12M120443 |
| *TBC1D14* |  | GC04P006910 |
| *SUDS3* |  | GC12P118376 |
| *SUGP1* |  | GC19M019276 |
| *CNTNAP5* |  | GC02P124025 |
| *SF3B6* |  | GC02M024067 |
| *UTP15* |  | GC05P073565 |
| *ZNF385B* |  | GC02M179441 |
| *ZXDC* |  | GC03M126437 |
| *VPS13C* |  | GC15M061852 |
| *UTP3* |  | GC04P070688 |
| *ARMC3* |  | GC10P022928 |
| *BEND7* |  | GC10M013392 |
| *ABHD13* |  | GC13P108218 |
| *MRPL9* |  | GC01M151759 |
| *DBR1* |  | GC03M138160 |
| *SCRG1* |  | GC04M173384 |
| *RRP1* |  | GC21P043789 |
| *SLC38A10* |  | GC17M081244 |
| *INTS5* |  | GC11M063432 |
| *TIPARP* |  | GC03P156673 |
| *TMEM147* |  | GC19P035545 |
| *RCOR3* |  | GC01P211258 |
| *EML3* |  | GC11M062602 |
| *ZNF830* |  | GC17P034961 |
| *BCL2L15* |  | GC01M113876 |
| *BIVM* |  | GC13P102799 |
| *C16orf70* |  | GC16P067109 |
| *CXCL17* |  | GC19M042428 |
| *RMDN3* |  | GC15M040735 |
| *GIMAP1* |  | GC07P150717 |
| *GIMAP8* |  | GC07P150450 |
| *CEP131* |  | GC17M081189 |
| *RHOV* |  | GC15M040872 |
| *HMGXB4* |  | GC22P035256 |
| *RFX7* |  | GC15M056087 |
| *SOCS7* |  | GC17P038359 |
| *SHISA6* |  | GC17P011241 |
| *SNTG1* |  | GC08P049909 |
| *SNX29* |  | GC16P011976 |
| *RPL7L1* |  | GC06P047524 |
| *PLIN5* |  | GC19M004522 |
| *NUSAP1* |  | GC15P041354 |
| *NT5DC3* |  | GC12M103770 |
| *UBFD1* |  | GC16P023557 |
| *UMODL1* |  | GC21P042062 |
| *TEX10* |  | GC09M100302 |
| *TEX12* |  | GC11P112167 |
| *RABL6* |  | GC09P136807 |
| *TMEM45B* |  | GC11P129815 |
| *PRIMPOL* |  | GC04P184649 |
| *DNASE2B* |  | GC01P084398 |
| *PLAAT3* |  | GC11M063574 |
| *TCEAL7* |  | GC0XP103330 |
| *ZFPL1* |  | GC11P065084 |
| *ZKSCAN3* |  | GC06P028349 |
| *ZNF280C* |  | GC0XM130202 |
| *ZNF804B* |  | GC07P088759 |
| *ZBTB4* |  | GC17M007459 |
| *ATP5F1E* |  | GC20M059026 |
| *FAM98B* |  | GC15P038454 |
| *BLCAP* |  | GC20M037492 |
| *C7orf50* |  | GC07M000996 |
| *C1orf52* |  | GC01M085249 |
| *CTIF* |  | GC18P048539 |
| *AP5M1* |  | GC14P057268 |
| *GTPBP10* |  | GC07P090336 |
| *CEP170B* |  | GC14P104865 |
| *CLASRP* |  | GC19P045039 |
| *CGB5* |  | GC19P049043 |
| *DNAJC16* |  | GC01P015526 |
| *N4BP2L1* |  | GC13M033515 |
| *RNF175* |  | GC04M153710 |
| *PPP1R3E* |  | GC14M023295 |
| *IFNA16* |  | GC09M021216 |
| *ODF3* |  | GC11P000196 |
| *SLC25A48* |  | GC05P135579 |
| *SPRYD7* |  | GC13M049912 |
| *TMEM139* |  | GC07P144978 |
| *TRIM4* |  | GC07M099876 |
| *TMEM182* |  | GC02P102744 |
| *SCAF1* |  | GC19P049645 |
| *P3H3* |  | GC12P008179 |
| *KMT5B* |  | GC11M068155 |
| *ZNF575* |  | GC19P043525 |
| *ZNF385D* |  | GC03M021412 |
| *ZNF768* |  | GC16M030524 |
| *VOPP1* |  | GC07M055434 |
| *DHFR2* |  | GC03M094048 |
| *CCDC34* |  | GC11M027327 |
| *PROX2* |  | GC14M074852 |
| *SELENOP* |  | GC05M042800 |
| *TTLL2* |  | GC06P167325 |
| *RETREG1* |  | GC05M016472 |
| *RELL1* |  | GC04M037592 |
| *TMEM255B* |  | GC13P113759 |
| *SEPTIN7* |  | GC07P035841 |
| *NOL12* |  | GC22P037682 |
| *ZMAT5* |  | GC22M029730 |
| *CAAP1* |  | GC09M026840 |
| *CCDC105* |  | GC19P015010 |
| *H2AC11* |  | GC06P028873 |
| *EEF1AKNMT* |  | GC01P171793 |
| *IRGQ* |  | GC19M043584 |
| *H2AC13* |  | GC06P028797 |
| *H2AC15* |  | GC06M028353 |
| *H2AC16* |  | GC06P028809 |
| *HASPIN* |  | GC17P003742 |
| *ELOA* |  | GC01P023744 |
| *EMC9* |  | GC14M024138 |
| *PPP4R3A* |  | GC14M094055 |
| *TMEM151B* |  | GC06P044270 |
| *KNOP1* |  | GC16M019714 |
| *PUM3* |  | GC09M002721 |
| *C10orf99* |  | GC10P084173 |
| *GCN1* |  | GC12M120128 |
| *C2orf72* |  | GC02P231037 |
| *CTAG1A* |  | GC0XP154585 |
| *H2AC17* |  | GC06M028365 |
| *CFAP251* |  | GC12P122871 |
| *IGIP* |  | GC05P140125 |
| *ODF4* |  | GC17P008339 |
| *TOPAZ1* |  | GC03P044283 |
| *TENT2* |  | GC05P079613 |
| *MCUB* |  | GC04P109561 |
| *CEMIP2* |  | GC09M071684 |
| *H2BC11* |  | GC06M027291 |
| *TRIM6-TRIM34* | | GC11P005597 |
| *VIRMA* |  | GC08M094488 |
| *FLACC1* |  | GC02M201290 |
| *REC114* |  | GC15P073443 |
| *ADGRF2* |  | GC06P047656 |
| *TRAC* |  | GC14P025249 |
| *KCNQ1OT1* |  | GC11M002661 |
| *IFTAP* |  | GC11P036594 |
| *NBPF14* |  | GC01M148531 |
| *SNHG32* |  | GC06P049128 |
| *UCA1* |  | GC19P015828 |
| *USP17L3* |  | GC08M007976 |
| *H2AB1* |  | GC0XP154885 |
| *TP73-AS1* |  | GC01M003735 |
| *ZSWIM9* |  | GC19P048171 |
| *BORCS8-MEF2B* | | GC19M019146 |
| *MIRLET7D* |  | GC09P094178 |
| *USP17L4* |  | GC08P007337 |
| *USP17L5* |  | GC04P009342 |
| *USP17L8* |  | GC08M007971 |
| *CFAP92* |  | GC03M129081 |
| *HAND2-AS1* |  | GC04P173527 |
| *HSP90AA2P* |  | GC11M027888 |
| *USP17L1* |  | GC08P007335 |
| *USP17L24* |  | GC04P009327 |
| *USP17L25* |  | GC04P009333 |
| *USP17L7* |  | GC08M012132 |
| *LINC00467* |  | GC01P211382 |
| *LINC00473* |  | GC06M165328 |
| *FAM30A* |  | GC14P105918 |
| *NPSR1-AS1* |  | GC07M034387 |
| *USP17L29* |  | GC04P009357 |
| *USP17L30* |  | GC04P009372 |
| *LINC00469* |  | GC17M073750 |
| *MIR211* |  | GC15M031065 |
| *MIR218-2* |  | GC05M168768 |
| *MIR874* |  | GC05M137647 |
| *MIR7-1* |  | GC09M084057 |
| *MIR1224* |  | GC03P184241 |
| *MIR484* |  | GC16P015657 |
| *IGLV3-21* |  | GC22P024550 |
| *IGLV3-25* |  | GC22P024545 |
| *PCGEM1* |  | GC02P192749 |
| *IGHV3-23* |  | GC14M106268 |
| *RPL36A-HNRNPH2* | | GC0XP101390 |
| *USP17L13* |  | GC04P009230 |
| *USP17L22* |  | GC04P009272 |
| *USP17L26* |  | GC04P009338 |
| *USP17L27* |  | GC04P009347 |
| *USP17L17* |  | GC04P009253 |
| *USP17L18* |  | GC04P009254 |
| *USP17L20* |  | GC04P009260 |
| *IGLV1-44* |  | GC22P024522 |
| *PCAT1* |  | GC08P126553 |
| *IGHV4-31* |  | GC14M109667 |
| *SNHG20* |  | GC17P077087 |
| *TRGV3* |  | GC07M038662 |
| *USP17L15* |  | GC04P009237 |
| *MUC3B* |  | GC07U903146 |
| *MIR98* |  | GC0XM053582 |
| *USP17L10* |  | GC04P009215 |
| *USP17L11* |  | GC04P009219 |
| *USP17L12* |  | GC04P009220 |
| *USP17L19* |  | GC04P009256 |
| *USP17L28* |  | GC04P009352 |
| *METTL21EP* |  | GC13P102880 |
| *CLRN1-AS1* |  | GC03P150852 |
| *MIR490* |  | GC07P136903 |
| *IGLV1-40* |  | GC22P024527 |
| *IGLV3-19* |  | GC22P024552 |
| *IGLV4-3* |  | GC22P022871 |
| *IGLV7-43* |  | GC22P024523 |
| *IGHV3-48* |  | GC14M109596 |
| *IGHV3-7* |  | GC14M106062 |
| *IGHV7-81* |  | GC14M109675 |
| *LINC00243* |  | GC06M030901 |
| *TRBC2* |  | GC07P144965 |
| *TRBV5-4* |  | GC07P145158 |
| *TRBV3-1* |  | GC07P144924 |
| *TRDC* |  | GC14P022462 |
| *TRGC2* |  | GC07M038239 |
| *IGLV2-14* |  | GC22P024560 |
| *IGKV3-20* |  | GC02M089811 |
| *USP17L21* |  | GC04P009265 |
| *IGHV1-2* |  | GC14M105986 |
| *IGLV2-8* |  | GC22P024564 |
| *MIR1301* |  | GC02M025328 |
| *MIR1266* |  | GC15M060771 |
| *MIR190B* |  | GC01M154193 |
| *IGKV1D-13* |  | GC02P090503 |
| *IGKV1D-16* |  | GC02P090100 |
| *IGLV1-36* |  | GC22P024531 |
| *IGLV1-47* |  | GC22P024518 |
| *IGLV3-16* |  | GC22P024558 |
| *IGLV3-27* |  | GC22P024541 |
| *IGLV8-61* |  | GC22P022098 |
| *IGHV3-74* |  | GC14M109662 |
| *IGHV4-28* |  | GC14M106324 |
| *IGHV3-11* |  | GC14M106116 |
| *IGHV3-30* |  | GC14M109647 |
| *IGKV2-24* |  | GC02M089820 |
| *SAA3P* |  | GC11M018112 |
| *TRAV20* |  | GC14P022097 |
| *TRBV12-3* |  | GC07P145147 |
| *TRBV28* |  | GC07P144943 |
| *TRBV19* |  | GC07P144930 |
| *IGLV3-10* |  | GC22P022811 |
| *IGKV1-17* |  | GC02M089824 |
| *IGLV2-11* |  | GC22P024563 |
| *IGLV2-18* |  | GC22P024554 |
| *TRAV12-2* |  | GC14P021889 |
| *SNORD48* |  | GC06P047329 |
| *IGHV3-33* |  | GC14M109650 |
| *USP17L9P* |  | GC04P009362 |
| *MIR3188* |  | GC19P018282 |
| *MIR613* |  | GC12P012766 |
| *MIR647* |  | GC20M063942 |
| *MIR711* |  | GC03M048578 |
| *MSC-AS1* |  | GC08P071828 |
| *MIR504* |  | GC0XM138667 |
| *IGLV3-12* |  | GC22P024562 |
| *IGLV3-9* |  | GC22P024566 |
| *IGLV7-46* |  | GC22P024520 |
| *IGKV3D-15* |  | GC02P090500 |
| *IGKV5-2* |  | GC02P088897 |
| *IGHV1-18* |  | GC14M109581 |
| *IGHV1-24* |  | GC14M106276 |
| *IGHV1-3* |  | GC14M109575 |
| *IGKV2D-28* |  | GC02P090487 |
| *IGKV2D-29* |  | GC02P090491 |
| *IGHV3-38* |  | GC14M109655 |
| *IGHV3-43* |  | GC14M109587 |
| *IGHV3-49* |  | GC14M109597 |
| *IGHV3-53* |  | GC14M109603 |
| *IGHV4-39* |  | GC14M109669 |
| *IGHV4-61* |  | GC14M109613 |
| *IGHV5-51* |  | GC14M109600 |
| *PRICKLE2-AS3* | | GC03P064187 |
| *IGHV3-20* |  | GC14M106210 |
| *IGKV2-30* |  | GC02M089834 |
| *TRBV27* |  | GC07P144944 |
| *TRBV30* |  | GC07M142812 |
| *TRDV1* |  | GC14P022096 |
| *TRGV5* |  | GC07M038658 |
| *TRGC1* |  | GC07M038257 |
| *IGKV1-27* |  | GC02M089838 |
| *IGKV1-33* |  | GC02M089840 |
| *IGKV1D-8* |  | GC02P090505 |
| *IGKV3-11* |  | GC02M089823 |
| *IGHV3-35* |  | GC14M109652 |
| *TRAV13-2* |  | GC14P021918 |
| *USP17L6P* |  | GC04P009371 |
| *LINC01081* |  | GC16M086220 |
| *ZNF815P* |  | GC07P005823 |
| *MIR1258* |  | GC02M179860 |
| *BISPR* |  | GC19P023493 |
| *C13orf42* |  | GC13M051094 |
| *ANKRD34C-AS1* | | GC15M079141 |
| *IGKV1-9* |  | GC02M089809 |
| *IGKV1D-17* |  | GC02P090082 |
| *IGLV10-54* |  | GC22P024229 |
| *IGLV1-50* |  | GC22P022327 |
| *IGLV4-60* |  | GC22P024234 |
| *IGLV5-37* |  | GC22P024530 |
| *IGLV5-52* |  | GC22P022318 |
| *IGKV3-7* |  | GC02M089807 |
| *IGKV3D-11* |  | GC02P090172 |
| *IGKV3D-7* |  | GC02P090234 |
| *IGKV2-40* |  | GC02M089844 |
| *IGKV2D-24* |  | GC02P090497 |
| *IGHV3-73* |  | GC14M109661 |
| *IGHV3-16* |  | GC14M106165 |
| *IGKV2-29* |  | GC02M089830 |
| *LACTB2-AS1* |  | GC08P070608 |
| *TRAV39* |  | GC14P022304 |
| *TRAV18* |  | GC14P022003 |
| *TRAV9-2* |  | GC14P021941 |
| *TRAV19* |  | GC14P022007 |
| *TRAV8-3* |  | GC14P021855 |
| *TRBV25-1* |  | GC07P144937 |
| *TRBV11-2* |  | GC07P145143 |
| *TRBV2* |  | GC07P144923 |
| *TRBV20-1* |  | GC07P144931 |
| *TRDV3* |  | GC14M022469 |
| *LINC00331* |  | GC13M078787 |
| *IGKV1-12* |  | GC02M089040 |
| *IGKV1-16* |  | GC02M089821 |
| *IGKV1D-43* |  | GC02P090209 |
| *IGLV2-23* |  | GC22P024547 |
| *IGLV3-1* |  | GC22P022880 |
| *IGKV3-15* |  | GC02M089085 |
| *TRAV22* |  | GC14P022122 |
| *TRAV24* |  | GC14P022105 |
| *TRAV13-1* |  | GC14P021868 |
| *TRAV26-1* |  | GC14P022123 |
| *TBC1D27P* |  | GC17M016927 |
| *IGKV1-37* |  | GC02M089297 |
| *IGKV1-6* |  | GC02M089157 |
| *IGKV1-8* |  | GC02M089808 |
| *IGKV1D-12* |  | GC02P090159 |
| *IGLV11-55* |  | GC22P022201 |
| *IGLV3-22* |  | GC22P024549 |
| *IGLV5-48* |  | GC22P022352 |
| *IGKV3D-20* |  | GC02P090498 |
| *IGKV6-21* |  | GC02M089812 |
| *IGKV6D-21* |  | GC02P090494 |
| *IGKV6D-41* |  | GC02P090069 |
| *IGKV2D-26* |  | GC02P090489 |
| *IGKV2D-30* |  | GC02P090490 |
| *IGKV2D-40* |  | GC02P089853 |
| *IGHV3-64* |  | GC14M109617 |
| *IGHV2-5* |  | GC14M106037 |
| *IGKV2-28* |  | GC02M089829 |
| *TRAV16* |  | GC14P021991 |
| *TRAV17* |  | GC14P021998 |
| *TRAV41* |  | GC14P022322 |
| *TRAV8-4* |  | GC14P021894 |
| *TRBV4-2* |  | GC07P144929 |
| *TRBV5-1* |  | GC07P144926 |
| *TRBV6-5* |  | GC07P145164 |
| *TRGV4* |  | GC07M038660 |
| *TRGV8* |  | GC07M038653 |
| *TTC41P* |  | GC12M103843 |
| *TRAV25* |  | GC14P022125 |
| *FILNC1* |  | GC06P139677 |
| *LOC389641* |  | GC08P023227 |
| *IGKV1D-42* |  | GC02P090190 |
| *IGLV4-69* |  | GC22P022030 |
| *IGLV5-45* |  | GC22P022375 |
| *IGLV9-49* |  | GC22P022343 |
| *IGHV3-9* |  | GC14P8B0025 |
| *IGHV4-59* |  | GC14M109609 |
| *IGHV2-26* |  | GC14M106301 |
| *IGHV2-70* |  | GC14M109644 |
| *TRAV1-1* |  | GC14P021622 |
| *TRAV1-2* |  | GC14P021642 |
| *TRAV14DV4* |  | GC14P021924 |
| *TRAV4* |  | GC14P021737 |
| *TRAV8-6* |  | GC14P021980 |
| *TRAV29DV5* |  | GC14P022163 |
| *TRAV3* |  | GC14P021724 |
| *TRAV10* |  | GC14P021825 |
| *TRAV9-1* |  | GC14P021811 |
| *TRAV30* |  | GC14P022168 |
| *TRAV6* |  | GC14P021768 |
| *TRBJ2-2* |  | GC07P144948 |
| *TRAV2* |  | GC14P021712 |
| *TRAV8-1* |  | GC14P021797 |
| *TRAV8-2* |  | GC14P021846 |
| *TRAV21* |  | GC14P022126 |
| *TRBV24-1* |  | GC07P144935 |
| *TRBV11-1* |  | GC07P145142 |
| *TRBV6-6* |  | GC07P145165 |
| *TRBV6-8* |  | GC07P145167 |
| *TRBV5-6* |  | GC07P145160 |
| *TRBV29-1* |  | GC07P144942 |
| *TRBV9* |  | GC07P145178 |
| *TRGV2* |  | GC07M038663 |
| *IGKV1-13* |  | GC02M089815 |
| *IGLJ1* |  | GC22P022893 |
| *IGHV1-8* |  | GC14U990227 |
| *TRAV23DV6* |  | GC14P022119 |
| *TRAV12-3* |  | GC14P021965 |
| *TRAV38-1* |  | GC14P022271 |
| *TRAV38-2DV8* | | GC14P022281 |
| *TRAV26-2* |  | GC14P022202 |
| *LOC100506258* | | GC11M007383 |
| *LOC101929710* | | GC05P095962 |
| *IGHV1-58* |  | GC14M109608 |
| *LINC01342* |  | GC01P001466 |
| *LINC00836* |  | GC10P025651 |
| *LINC02367* |  | GC12P010190 |
| *CASP1P2* |  | GC11M105063 |
| *ERVK-24* |  | GC22U900840 |
| *DHFRP1* |  | GC18M026167 |
| *IGLV3-32* |  | GC22P024538 |
| *IFNA22P* |  | GC09M021369 |
| *IATPR* |  | GC10M033073 |
| *IGHV4-30-2* |  | GC14M109666 |
| *LOC102724404* | | GC05M157362 |
| *TRAJ3* |  | GC14P025264 |
| *TRAJ42* |  | GC14P025275 |
| *UGT1A* |  | GC02P233586 |
| *TRAV27* |  | GC14P022147 |
| *TRAV5* |  | GC14P021749 |
| *TRAV7* |  | GC14P021782 |
| *TRBJ2-3* |  | GC07P144950 |
| *TRAV34* |  | GC14P022207 |
| *TRBJ2-4* |  | GC07P144951 |
| *TRAV35* |  | GC14P022230 |
| *TRBJ2-5* |  | GC07P144954 |
| *TRBJ2-6* |  | GC07P144953 |
| *TRBJ2-7* |  | GC07P144952 |
| *TRBV10-1* |  | GC07P145139 |
| *TRBV10-2* |  | GC07P145140 |
| *TRBJ2-1* |  | GC07P144947 |
| *TRBV5-5* |  | GC07P145159 |
| *TRBV7-2* |  | GC07P145168 |
| *TRBV7-4* |  | GC07P145170 |
| *TRBV6-4* |  | GC07P145163 |
| *TRBV7-6* |  | GC07P145173 |
| *TRBV7-7* |  | GC07P145174 |
| *TRBV7-9* |  | GC07P145175 |
| *TRDJ1* |  | GC14P025206 |
| *TRGJ1* |  | GC07M038269 |
| *LINC00328* |  | GC21U900445 |
| *TMEM132D-AS1* | | GC12P129110 |
| *IGLV2-33* |  | GC22P022588 |
| *TRAV12-1* |  | GC14P021842 |
| *TRAV36DV7* |  | GC14P022232 |
| *LINC02090* |  | GC17P016989 |
| *LINC02864* |  | GC18M073103 |
| *LRRTM4-AS1* |  | GC02P076986 |
| *DNAJC8P1* |  | GC14P035429 |
| *IGKV1D-37* |  | GC02P089884 |
| *IGKJ1* |  | GC02M089141 |
| *IGHV2-70D* |  | GC14M109645 |
| *IGKV2-26* |  | GC02M089828 |
| *SRP14P1* |  | GC12P008143 |
| *TRAJ31* |  | GC14P025233 |
| *TRBD1* |  | GC07P144955 |
| *TRBV12-4* |  | GC07P145148 |
| *TRBJ1-1* |  | GC07P144961 |
| *TRBV13* |  | GC07P145150 |
| *TRBJ1-2* |  | GC07P144964 |
| *TRBJ1-3* |  | GC07P144960 |
| *TRBV14* |  | GC07P145151 |
| *TRBJ1-4* |  | GC07P144962 |
| *TRBJ1-5* |  | GC07P144945 |
| *TRBV10-3* |  | GC07P145141 |
| *TRBJ1-6* |  | GC07P144957 |
| *TRBV18* |  | GC07P145155 |
| *TRBV11-3* |  | GC07P145144 |
| *TRBV6-3* |  | GC07P145162 |
| *TRDD1* |  | GC14P022441 |
| *RAP1BL* |  | GC05M076171 |
| *TBILA* |  | GC03P112134 |
| *ISCA2P1* |  | GC22M026644 |
| *LINC01781* |  | GC01P080536 |
| *ZNF123P* |  | GC11M129295 |
| *ERVK-11* |  | GC03U901891 |
| *IFNWP19* |  | GC09P021493 |
| *IGHV5-10-1* |  | GC14M109670 |
| *IGHV7-4-1* |  | GC14M109673 |
| *TRBV12-5* |  | GC07P145149 |
| *TRBV6-9* |  | GC07Pi00510 |
| *TRBV7-8* |  | GC07Pi00515 |
| *LGTN* |  | GC00U932017 |
| *IGHD3-16* |  | GC14M109557 |
| *LOC392196* |  | GC08M012127 |
| *IGLV5-39* |  | GC22Pi00029 |
| *SERPINB8P1* |  | GC06P003048 |
| *IFNWP15* |  | GC09M021370 |
| *IFNWP18* |  | GC09M021209 |
| *IFNWP9* |  | GC09M021371 |
| *IGHD5-24* |  | GC14M109549 |
| *IGHD6-19* |  | GC14M109554 |
| *IGHV3-64D* |  | GC14M109657 |
| *NM* |  | GC07U990060 |
| *TRBV4-3* |  | GC07Pi00324 |
| *TRBV5-8* |  | GC07Pi00523 |
| *IGHD2-2* |  | GC14M109572 |
| *IGHV1-69-2* |  | GC14M109642 |
| *IGHV1-69D* |  | GC14M109643 |
| *LOC649352* |  | GC08M012378 |
| *MRPS33P1* |  | GC01M154377 |
| *IGHD1-20* |  | GC14M109553 |
| *IGHD1-26* |  | GC14M109547 |
| *IGHD4-23* |  | GC14M109550 |
| *IGHD4-4* |  | GC14M109570 |
| *IGHD5-18* |  | GC14M109555 |
| *IGHD5-5* |  | GC14M109569 |
| *IGHD6-25* |  | GC14M109548 |
| *IGHD6-6* |  | GC14M109568 |
| *IGHV3-43D* |  | GC14U901806 |
| *IGHV4-30-4* |  | GC14U990153 |
| *IGHD4-17* |  | GC14M109556 |
| *NBEAP2* |  | GC02P132757 |
| *NBEAP3* |  | GC22P015852 |
| *SEA* |  | GC11U990124 |
| *IGHD3-22* |  | GC14M109551 |
| *IGHV3-30-3* |  | GC14U990409 |
| *IGHV3-30-5* |  | GC14U990454 |
| *PPIAP33* |  | GC09P007499 |
| *LOC102724971* | | GC15M021742 |
| *USP17L14P* |  | GC04P009232 |
| *USP17L16P* |  | GC04P009251 |
| *RPL10P17* |  | GC01M012220 |
| *TFDP1P1* |  | GC01P209375 |
| *LOC392187* |  | GC08M007967 |
| *ERVK-1* |  | GC01U903451 |
| *MLVI2* |  | GC05U990038 |
| *IBGC1* |  | GC14U900456 |
| *LOC402329* |  | GC08P007343 |
| *LOC100421094* | | GC08M012374 |
| *LOC101927484* | | GC12M055023 |
| *TFDP1P3* |  | GC15M079557 |
| *LOC111674463* | | GC07P117476 |
| *LOC110366354* | | GC07P099784 |
| *HSERVPRODH* |  | GC22P019572 |
| *ORI343* |  | GC06P071362 |
| *LOC108961161* | | GC06P047876 |
| *LOC107982234* | | GC11P032430 |

Table S3: The 216 intersection genes through which periplocin may regulate lymphoma progression.

*XIAP*

*MDM2*

*KIT*

*ZAP70*

*ITK*

*ABL1*

*FGFR1*

*IL2*

*PTPN11*

*CASP3*

*SYK*

*AKT1*

*CDK6*

*JAK3*

*PNP*

*JAK2*

*EGFR*

*RHOA*

*PARP1*

*HSP90AA1*

*ANXA5*

*MAPK8*

*CDK2*

*CCNA2*

*DPP4*

*ITGAL*

*PLK1*

*MAPK1*

*PIM1*

*GSTM1*

*GBA*

*NQO1*

*HSD17B11*

*IGF1R*

*CHEK1*

*LCK*

*MET*

*DAPK1*

*STAT1*

*IGF1*

*GSTP1*

*CASP7*

*TGFBR1*

*WAS*

*GALK1*

*SOD2*

*ALB*

*KDR*

*TYMS*

*MTAP*

*NR3C1*

*DCK*

*RARA*

*FHIT*

*TGFBR2*

*CD1A*

*DHFR*

*DDX6*

*SRC*

*CDA*

*CCL5*

*PIK3CG*

*HCK*

*MTHFD1*

*MMP9*

*PTPN1*

*C1S*

*KIF11*

*MAPK14*

*BAG1*

*B3GAT1*

*ARF1*

*SERPINA1*

*ESR1*

*BIRC7*

*PPARG*

*TGM2*

*GSR*

*ACE*

*F2*

*CCNT1*

*SRM*

*MMP2*

*RNASE3*

*SHMT1*

*ELANE*

*PRKCQ*

*FGFR2*

*MMP12*

*NOS2*

*TEK*

*LGALS3*

*ADAM17*

*PLAU*

*CA2*

*PDE3B*

*TYMP*

*CYP2C9*

*GSK3B*

*RHEB*

*GC*

*PDE4B*

*CSNK2A1*

*MAPK10*

*MMP3*

*NOS3*

*SELP*

*EPHX2*

*AR*

*AHCY*

*PADI4*

*RBP4*

*CRABP2*

*PDPK1*

*ERBB4*

*HMGCR*

*LGALS7*

*AKR1C1*

*ESR2*

*NR1H2*

*TTR*

*ANG*

*AKR1C3*

*HSPA8*

*RXRA*

*BCHE*

*CTSD*

*CSK*

*HSD17B1*

*FECH*

*CRAT*

*HDAC8*

*ISG20*

*TGFB2*

*GSTA1*

*EPHA2*

*PGF*

*MIF*

*SHBG*

*EPHB4*

*PLA2G2A*

*PGR*

*CSNK1G2*

*PAK6*

*FABP3*

*CLEC4M*

*APOA2*

*UCK2*

*TPI1*

*NR1I2*

*CFD*

*CYP19A1*

*CA12*

*NR1H3*

*BMP7*

*ADH5*

*FABP7*

*AKR1B1*

*FDPS*

*ACP3*

*PDE5A*

*F10*

*FKBP1A*

*PPIA*

*CTSB*

*CYP2C8*

*PRKACA*

*CTSG*

*MMP13*

*PAH*

*MAPKAPK2*

*PLA2G10*

*HSD11B1*

*ALDOA*

*THRA*

*RARG*

*ME2*

*DHODH*

*TPH1*

*TREM1*

*PPARD*

*RORA*

*PDE4D*

*PYGL*

*F7*

*BACE1*

*MMP8*

*GPI*

*GLO1*

*CDK5R1*

*RAB5A*

*PPARA*

*FNTA*

*CHIT1*

*BST1*

*C8G*

*IMPDH2*

*CES1*

*TNK2*

*LCN2*

*CTNNA1*

*UMPS*

*ADK*

*GCK*

*NMNAT1*

*IMPDH1*

*HEXB*

*CBR1*

*ARG2*

*NQO2*

*FABP4*

*SULT2A1*

*ARHGAP1*

*TTPA*

*ABO*

*IGLV2-8*

| Table S4: The 10 hub genes, ranked by the MCC method. | | |
| --- | --- | --- |
| Rank | Name | Score |
| 1 | *MAPK1* | 3870 |
| 2 | *LCK* | 3368 |
| 3 | *PTPN11* | 3075 |
| 4 | *RHOA* | 2211 |
| 5 | *SRC* | 2090 |
| 6 | *IL2* | 1800 |
| 7 | *JAK3* | 1776 |
| 8 | *EGFR* | 1226 |
| 9 | *AKT1* | 1144 |
| 10 | *JAK2* | 1020 |
